# Supplementary material for: Cationic tetranuclear macrocyclic CaCo3 complexes as highly active catalysts for alternating copolymerization of propylene oxide and carbon dioxide
Source: Royal Society of Chemistry journal article supplement (doi:10.1039/d3sc00974b), 2023-01-01
Supplement: d3sc00974b1.pdf [file d3sc00974b1.pdf]

## Supplementary Information

### **Cationic Tetranuclear Macrocyclic $\text{CaCO}_3$ Complexes as Highly Active Catalysts for Alternating Copolymerization of Propylene Oxide and Carbon Dioxide**

Haruki Nagae,<sup>a</sup> Saki Matsushiro,<sup>a</sup> Jun Okuda,<sup>\*b</sup> and Kazushi Mashima<sup>\*a</sup>

<sup>a</sup> Department of Chemistry, Graduate School of Engineering Science, Osaka University, Toyonaka, Osaka 560-8531, Japan

<sup>b</sup> Institute of Inorganic Chemistry, RWTH Aachen University, Landoltweg 1, D-52062 Aachen, Germany

#### **Contents:**

- 1. General information**
- 2. Preparation of Complexes**
- 3. Optimization of Reaction Conditions**
- 4. X-Ray Crystallographic Analysis**
- 5. GPC Charts**
- 6. DFT Calculations**
- 7. References**

## 1. General information

All the manipulations were carried out under the protection of argon using standard Schlenk or glovebox techniques when we treated air and moisture sensitive compound. Solvents, such as Et<sub>2</sub>O and CH<sub>2</sub>Cl<sub>2</sub>, were dried and deoxygenated using a Grubbs column (Glass Counter Solvent Dispensing System, Nikko Hansen & Co, Ltd.).<sup>S1</sup> MeOH and DMF were used as purchased. Carbon dioxide (>99.99 vol%) was purchased from NIPPON EKITAN Corporation. Propylene oxide was dried over calcium hydride and distilled under argon twice. NMR spectra were recorded on Bruker Avance III-400 spectrometers. All <sup>1</sup>H NMR chemical shifts are reported in ppm (δ) relative to tetramethylsilane at δ 0.00 or referenced to the chemical shifts of residual solvent resonances (CDCl<sub>3</sub>: 7.26 ppm, acetonitrile-*d*<sub>3</sub>: 1.94 ppm). All <sup>13</sup>C{<sup>1</sup>H} NMR chemical shifts are reported in ppm (δ) relative to carbon resonances of CDCl<sub>3</sub>. Polymer selectivity was determined from the <sup>1</sup>H NMR spectrum by comparing normalized integrals for poly(propylene carbonate) (PPC) (4.92 ppm, 1H) and propylene carbonate (PC) (4.77 ppm, 1H), poly(propylene oxide) (PPO) (3.46-3.64 ppm, 3H) resonances using phenanthrene as an internal standard. Carbonate Linkage of polymer was determined from the <sup>1</sup>H NMR spectrum by comparing normalized integrals for PPC and PPO resonances. GPC analyses were carried out at 40 °C by using a Shimadzu LC-20AD liquid chromatograph system and a RID 10A refractive index detector, equipped with a Shodex KF806L column which was calibrated versus commercially available polystyrene standards (SHOWA DENKO). The molecular weight and PDI were calibrated against standard polystyrene samples. ESI-MS spectrometric data was obtained using BRUKER microTOF-II spectrometer. FAB mass spectra were recorded on a JEOL JMS-700 spectrometer. Flash column chromatography was performed using silica gel 60 (0.040-0.063 mm, 230-400 mesh ASTM). The elemental analyses were recorded by using Perkin Elmer 2400 at the Faculty of Engineering Science, Osaka University.

### General procedure for the alternating copolymerization

Before starting reaction, a 100 mL autoclave reactor was dried at 65 °C for 1 h under reduced pressure. In a typical experiment, macrocyclic complexes (0.0100 mmol), additives and epoxides (60.0 mmol) were added to the autoclave under an argon atmosphere. The reactor was then pressurized with CO<sub>2</sub> and heated by an oil-bath. After the reaction, the autoclave was cooled, and CO<sub>2</sub> pressure was released. The polymerization mixture was diluted with CH<sub>2</sub>Cl<sub>2</sub>, and phenanthrene was added as an internal standard. The yield of copolymer, cyclic carbonate, and carbonate linkage content were determined by the <sup>1</sup>H NMR analyses of the small portion of the mixture. The mixture was then passed through silica gel and dropped into MeOH to give white precipitation of copolymer. The molecular weight and molecular-weight distribution was determined by GPC analysis in THF using polystyrene standards as calibrates.

## Synthesis of 2,3-dihydroxybenzene-1,4-dicarbaldehyde<sup>S2</sup>

**Scheme S1.** Preparation of 2,3-dihydroxybenzene-1,4-dicarbaldehyde

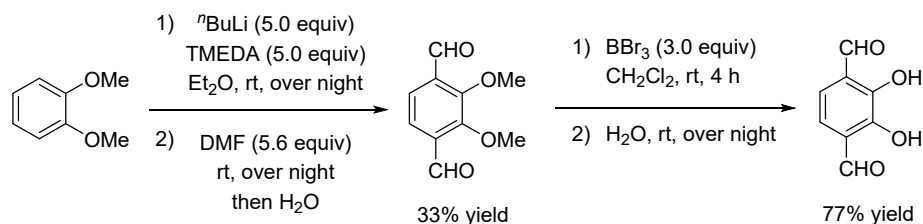

2,3-dihydroxybenzene-1,4-dicarbaldehyde was prepared from *o*-dimethoxybenzene (6.30 mL, 50.0 mmol) according to the literature to obtain the desired product. The product was recrystallized from CHCl<sub>3</sub>/hexane to give yellow crystal (1.92 g, 11.6 mmol, 23% yield). <sup>1</sup>H NMR (400 MHz, CDCl<sub>3</sub>, 30 °C): δ 10.85 (s, 2H, OH), 10.02 (s, 2H, CHO), 7.27 (s, 2H, Ar); <sup>13</sup>C{<sup>1</sup>H} NMR (100 MHz, CDCl<sub>3</sub>, 30 °C): δ 196.5 (CHO), 150.9 (Ar), 123.3 (Ar), 122.4 (Ar).

## 2. Preparation of complexes **1**<sub>CaM</sub>

**Scheme S2.** Preparation of **1**<sub>Ca</sub> and **1**<sub>CaM</sub>

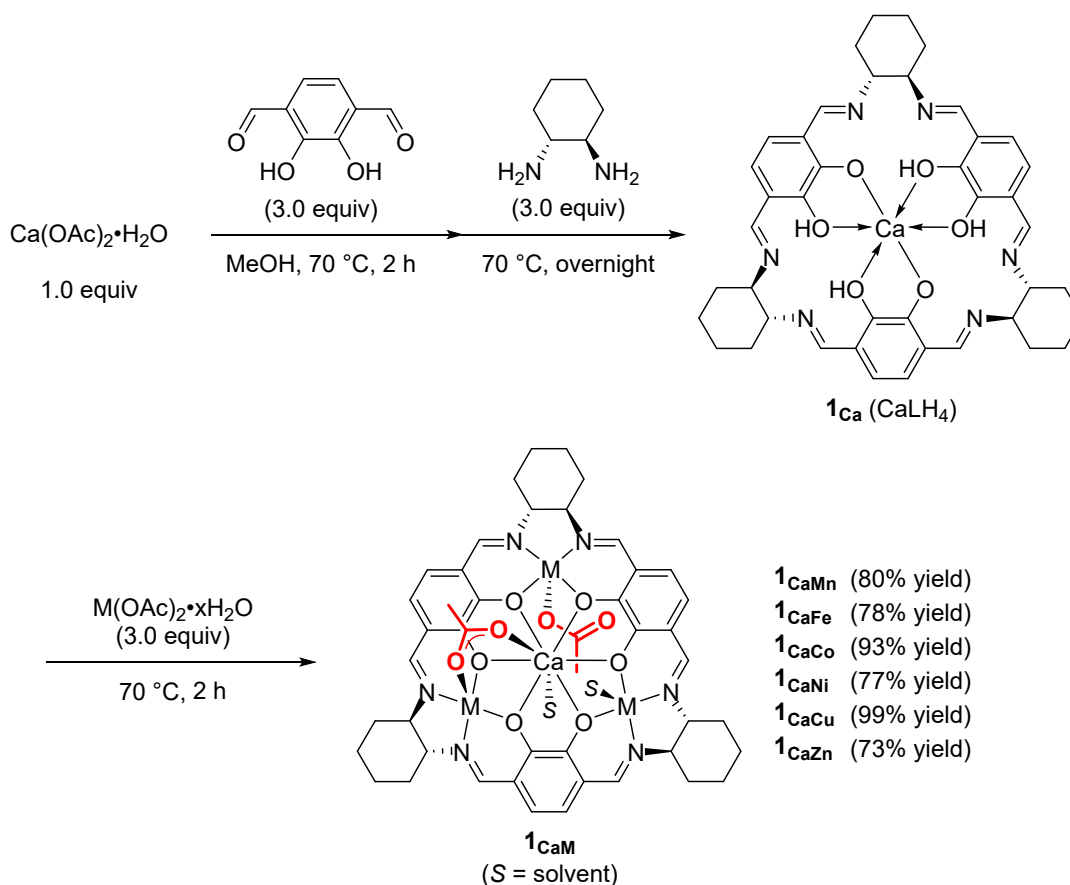

A solution of 2,3-dihydroxybenzene-1,4-dicarbaldehyde (3.0 equiv) in methanol were added to a solution of Ca(OAc)<sub>2</sub>·nH<sub>2</sub>O (1.0 equiv) in methanol. After stirring at 70 °C for 2 hours, a solution of (*R,R*)-1,2-cyclohexanediamine (3.3 equiv) in methanol was added and the resulting mixture was

stirred for 18 h at 70 °C, and then a solution of  $M(\text{OAc})_2 \cdot m\text{H}_2\text{O}$  (3.0 equiv) in methanol was added. After stirring at 70 °C for 2 hours, solvent was removed.

**1<sub>CaCo</sub>**: Reddish purple solid (93%yield): Calcd for  $\text{CaCo}_3\text{C}_{46}\text{H}_{62}\text{N}_6\text{O}_{14}$  (**1<sub>CaCo</sub>**•2MeOH•6H<sub>2</sub>O): C, 46.72; H, 4.99; N, 6.39. Found: C, 46.68; H, 5.27; N, 6.60; MS (ESI<sup>+</sup>) *m/z*: 471.54 ([M-2OAc]<sup>2+</sup>); m.p.: >300 °C.

**1<sub>CaMn</sub>**: Orange red solid (80%yield): Calcd for  $\text{CaMn}_3\text{C}_{44}\text{H}_{58}\text{N}_6\text{O}_{12}$  (**1<sub>CaMn</sub>**•2MeOH•4H<sub>2</sub>O): C, 48.61; H, 5.44; N, 7.09. Found: C, 48.58; H, 5.76; N, 7.04; m.p.: >300 °C.

**1<sub>CaFe</sub>**: Dark brown solid (78%yield): Calcd for  $\text{CaFe}_3\text{C}_{48}\text{H}_{60}\text{N}_6\text{O}_{15}$  (**1<sub>CaFe</sub>**•3AcOH•3H<sub>2</sub>O): C, 48.54; H, 5.17; N, 6.53. Found: C, 48.26; H, 5.22; N, 6.62; m.p. >300 °C.

**1<sub>CaNi</sub>**: Red brown solid (77%yield): Calcd for  $\text{CaNi}_3\text{C}_{43}\text{H}_{50}\text{N}_6\text{O}_9$  (**1<sub>CaNi</sub>**•MeOH•2H<sub>2</sub>O): C, 49.99; H, 5.00; N, 7.17. Found: C, 50.20; H, 5.19; N, 7.14; m.p.: >300 °C.

**1<sub>CaCu</sub>**: Red brown solid (>99%yield): Calcd for  $\text{CaCu}_3\text{C}_{44}\text{H}_{60}\text{N}_6\text{O}_{13}$  (**1<sub>CaCu</sub>**•MeOH•AcOH • 4H<sub>2</sub>O): C, 46.47; H, 5.20; N, 6.78. Found: C, 47.36; H, 5.48; N, 6.97; MS (ESI<sup>+</sup>) *m/z*: 478.53 ([M-2OAc]<sup>2+</sup>); m.p.: >300 °C.

**1<sub>CaZn</sub>**: Red solid (73%yield): Calcd for  $\text{CaCo}_3\text{C}_{54}\text{H}_{72}\text{N}_6\text{O}_{22}$  (**1<sub>CaZn</sub>**•4AcOH•4H<sub>2</sub>O): C, 46.55; H, 5.21; N, 6.03. Found: C, 46.68; H, 5.32; N, 5.99; m.p.: >300 °C.

**2<sub>CaCo</sub>**: Reddish purple solid (61%yield): Calcd for  $\text{CaCo}_3\text{C}_{74}\text{H}_{70}\text{N}_6\text{O}_{18}$  (**2<sub>CaCo</sub>**•2AcOH•4H<sub>2</sub>O): C, 57.41; H, 4.56; N, 5.43. Found: C, 57.38; H, 4.54; N, 5.24; MS (ESI<sup>+</sup>) *m/z*: 618.58 ([M-2OAc]<sup>2+</sup>), 1296.17 ([M-OAc]<sup>+</sup>); m.p.: >300 °C.

### Preparation of complex **1<sub>Ca</sub>**

A solution of 2,3-dihydroxybenzene-1,4-dicarbaldehyde (32.0 mg, 190 μmol) in methanol (5 mL) were added to a solution of Ca(OAc)<sub>2</sub>·nH<sub>2</sub>O (11.0 mg, 0.064 mmol) in methanol (5 mL). After stirring at 70 °C for 2 hours, a solution of (*R,R*)-1,2-cyclohexanediamine (22.0 mg, 0.19 mmol) in methanol was added and the resulting mixture was stirred for 18 h at 70 °C, then, the resulting suspension was filtrated and all volatiles were removed and residual solid was washed with acetonitrile (1 ml × 2) to obtain red solid (51.3 mg, 0.064 mmol, quant. yield). Two singlet signals assignable to imine and aromatic were observed though the resulting solid was less soluble to non-protic solvents, such as CD<sub>2</sub>Cl<sub>2</sub>, CD<sub>3</sub>CN, and DMSO. <sup>1</sup>H NMR spectrum using methanol-*d*<sub>4</sub> as solvent afforded broad signals. m.p.: >300 °C, <sup>1</sup>H NMR (400 MHz, acetonitrile-*d*<sub>3</sub>, 30 °C) (well-resolved signals): δ 8.43 (s, 6H, N=CH), 6.87 (s, 6H, Ar). HRMS-FAB (*m/z*): [M+H]<sup>+</sup> calcd for C<sub>42</sub>H<sub>47</sub>N<sub>6</sub>O<sub>6</sub>Ca ([**1<sub>Ca</sub>**+H]<sup>+</sup>), 771.3183; found, 771.3186; Calcd for CaCO<sub>3</sub>C<sub>42</sub>H<sub>60</sub>N<sub>6</sub>O<sub>13</sub> (**1<sub>Ca</sub>**·7H<sub>2</sub>O): C, 56.24; H, 6.74; N, 9.37. Found: C, 56.32; H, 6.23; N, 9.52.

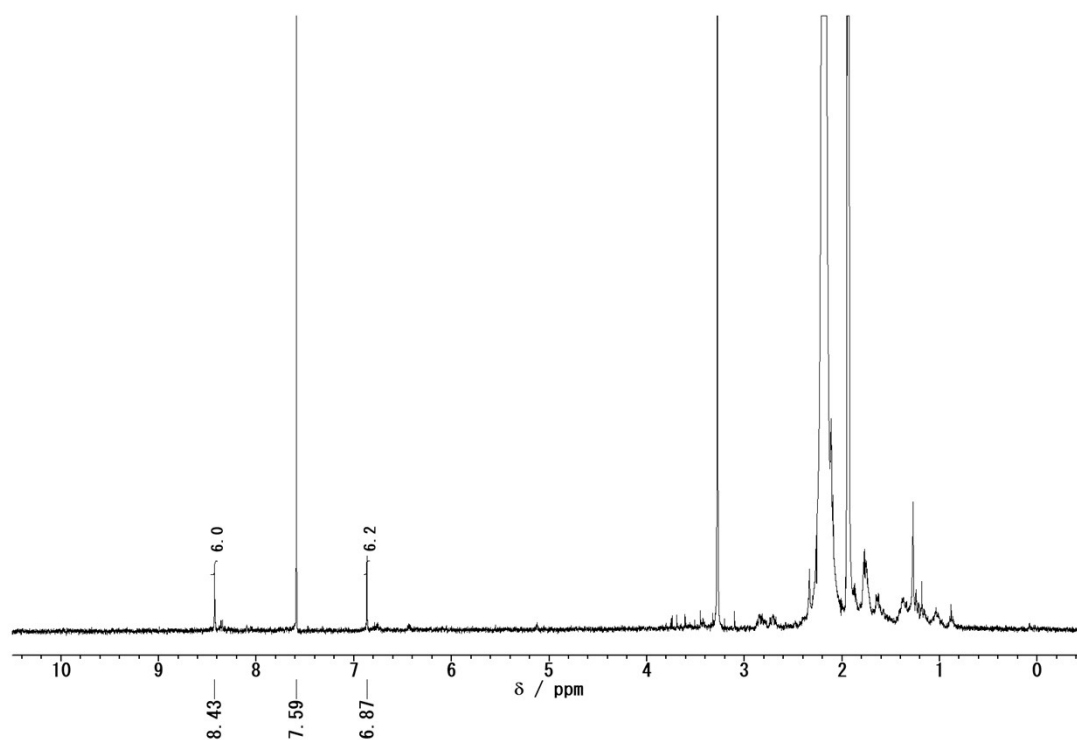

**Figure S1.** <sup>1</sup>H NMR spectrum of complex **1<sub>Ca</sub>**

### 3. Optimization of Reaction Conditions

**Table S1.** Optimization of reaction conditions for alternating copolymerization with **1**<sub>CaCo</sub>.

$\text{CO}_2$  +   $\xrightarrow[\text{neat, T } ^\circ\text{C, 16 h}]{\mathbf{1}_{\text{CaCo}} (\text{S/C} = 6000)}$  

x MPa      60 mmol

| entry | pressure [MPa] | temperature [°C] | TON <sup>a</sup> | polymer selectivity [%] <sup>a</sup> | carbonate linkage [%] <sup>a</sup> |
|-------|----------------|------------------|------------------|--------------------------------------|------------------------------------|
| 1     | 0.3            | 40               | 152              | 78                                   | >99                                |
| 2     | 0.5            | 40               | 224              | 90                                   | >99                                |
| 3     | 1.0            | 40               | 180              | 95                                   | >99                                |
| 4     | 2.0            | 40               | 164              | 93                                   | >99                                |
| 5     | 3.0            | 40               | 126              | 92                                   | >99                                |
| 6     | 0.5            | 50               | 236              | 73                                   | >99                                |
| 7     | 1.0            | 50               | 235              | 92                                   | >99                                |
| 8     | 1.0            | 60               | 167              | 65                                   | >99                                |
| 9     | 1.0            | 70               | 168              | 43                                   | >99                                |

<sup>a</sup> Determined by <sup>1</sup>H NMR analysis using phenanthrene as an internal standard.

#### 4. X-Ray Crystallographic Analysis

The crystal of  $\mathbf{1}_{\text{CaZn}}$  was mounted on the CryoLoop (Hampton Research Corp.) with a layer of light mineral oil and placed in a nitrogen stream at 113(2) K. Measurement was made on Rigaku XtaLAB P200 system with graphite-monochromated Mo-K $\alpha$  (0.71075 Å) radiation. The structures of complex  $\mathbf{1}_{\text{CaZn}}$  was solved by SHELXS-2013 in the CrystalClear program.<sup>S3</sup> The structure was refined on  $F^2$  by full-matrix least-squares method, using SHELXL-2013.<sup>S3</sup> The ORTEP-3 program was used to draw the molecule.<sup>S4</sup>

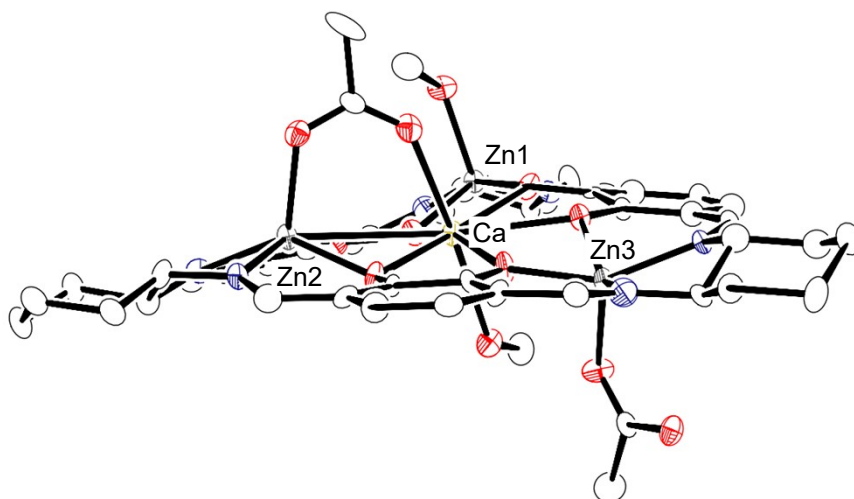

**Figure S2.** Preliminary crystal structure of  $\mathbf{1}_{\text{CaZn}}$ . All hydrogen atoms and solvent molecules are omitted for clarity.



## 5. GPC Charts

2022/12/15 13:18:33 1 / 2

### ==== Shimadzu LCsolution GPC Report ====

operator : Admin  
 sample name : MTS-5044  
 sample ID : MTS-5044  
 vial No : -1  
 Inj. Vol. : 20 uL  
 data file : MTS-5044.lcd  
 method file : mashima-lab 20211208.lcm  
 batch file :  
 report file : Default.lcr  
 acquisition data : 2021/12/08 16:00:57  
 modified data : 2021/12/09 13:46:02

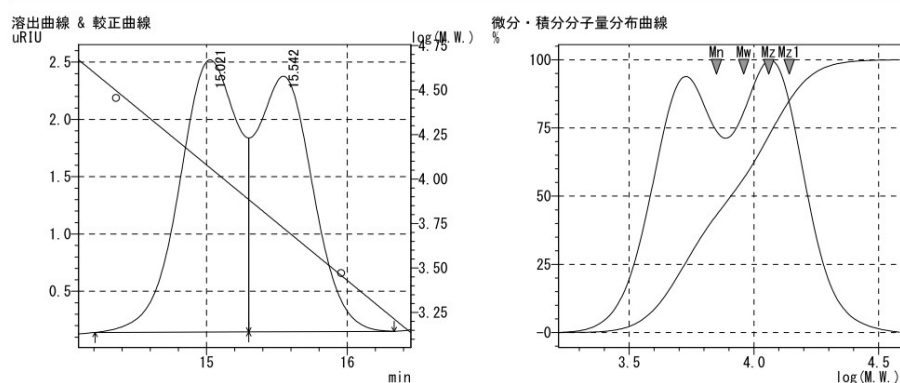

#### peak report

| 検出器A Ch1 | Peak# | retention tim | area   | height | area%   | height% |
|----------|-------|---------------|--------|--------|---------|---------|
|          | 1     | 15.021        | 69816  | 2375   | 53.063  | 51.577  |
|          | 2     | 15.542        | 61757  | 2230   | 46.937  | 48.423  |
| 合計       |       |               | 131573 | 4605   | 100.000 | 100.000 |

#### GPCAT 昇和系

Peak#:1 (検出器A Ch1)

| [t <sup>-</sup> 情報] | time(min) | tion amount | (ecular weig | height |
|---------------------|-----------|-------------|--------------|--------|
| 開始                  | 14.208    | 11.367      | 39236        | 141    |
| 頂点                  | 15.021    | 12.017      | 11634        | 2375   |
| 終了                  | 15.300    | 12.240      | 7668         | 146    |

area : 69816  
 area% : 53.0628

#### [平均分子量]

NAMW (Mn) 11605  
 WAMW (Mw) 12512  
 ZAMW (Mz) 13652  
 Z+1 AMW (Mz1) 15074  
 Mw/Mn 1.07816  
 Mv/Mn 0.00000  
 Mz/Mw 1.09112

Peak#:2 (検出器A Ch1)

| [t <sup>-</sup> 情報] | time(min) | tion amount | (ecular weig | height |
|---------------------|-----------|-------------|--------------|--------|
| 開始                  | 15.300    | 12.240      | 7668         | 146    |
| 頂点                  | 15.542    | 12.434      | 5340         | 2230   |
| 終了                  | 16.333    | 13.067      | 1635         | 151    |

area : 61757  
 area% : 46.9372

#### [平均分子量]

D:\DATA\matsushiro\MTS-5044.lcd

Figure S3. GPC chart of a sample for Table 1, entry 1.

### ==== Shimadzu LCsolution GPC Report ====

```

operator       : Admin
sample name    : MTS-5024_20211117
sample ID     : MTS-5024_20211117
vial No       : -1
Inj. Vol.     : 20 uL
data file     : MTS-5024_20211117.lcd
method file   : mashima-lab 20211117.lcm
batch file    :
report file   : Default.lcr
acquisition data : 2021/11/17 20:59:02
modified data  : 2021/11/18 13:20:35
  
```

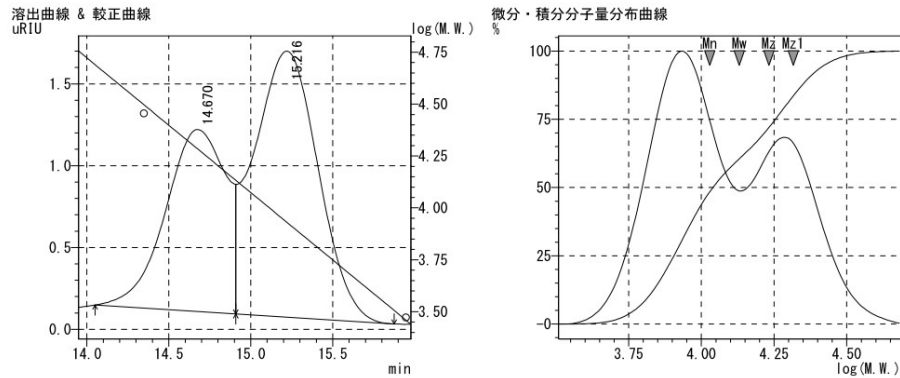

#### peak report

| 検出器A Ch1 | Peak# | retention tim | area  | height | area%   | height% |
|----------|-------|---------------|-------|--------|---------|---------|
|          | 1     | 14.670        | 28697 | 1112   | 39.471  | 40.628  |
|          | 2     | 15.216        | 44007 | 1625   | 60.529  | 59.372  |
|          | 合計    |               | 72704 | 2737   | 100.000 | 100.000 |

#### UPCAT 昇和系

Peak#:1 (検出器A Ch1)

[ピーク情報]

|    | time(min) | tion amount | (lecular weig | height |
|----|-----------|-------------|---------------|--------|
| 開始 | 14.050    | 11.240      | 48993         | 149    |
| 頂点 | 14.670    | 11.736      | 19401         | 1112   |
| 終了 | 14.908    | 11.927      | 13587         | 94     |

area : 28697  
area% : 39.4714

[平均分子量]

|               |         |
|---------------|---------|
| NAMW (Mn)     | 19577   |
| WAMW (Mw)     | 20732   |
| ZAMW (Mz)     | 22108   |
| Z+1 AMW (Mz1) | 23709   |
| Mw/Mn         | 1.05899 |
| Mv/Mn         | 0.00000 |
| Mz/Mw         | 1.06635 |

Peak#:2 (検出器A Ch1)

[ピーク情報]

|    | time(min) | tion amount | (lecular weig | height |
|----|-----------|-------------|---------------|--------|
| 開始 | 14.908    | 11.927      | 13587         | 94     |
| 頂点 | 15.216    | 12.172      | 8584          | 1625   |
| 終了 | 15.875    | 12.700      | 3205          | 33     |

area : 44007  
area% : 60.5286

[平均分子量]

D:\DATA\matsushiro\MTS-5024\_20211117.lcd

Figure S4. GPC chart of a sample for Table 1, entry 7.

==== Shimadzu LCsolution GPC Report ====

operator : Admin  
 sample name : MTS-5027\_20211117  
 sample ID : MTS-5027\_20211117  
 vial No : -1  
 Inj. Vol. : 20 uL  
 data file : MTS-5027\_20211117.lcd  
 method file : mashima-lab 20211117.lcm  
 batch file :  
 report file : Default.lcr  
 acquisition data : 2021/11/17 23:50:49  
 modified data : 2021/11/18 13:25:05

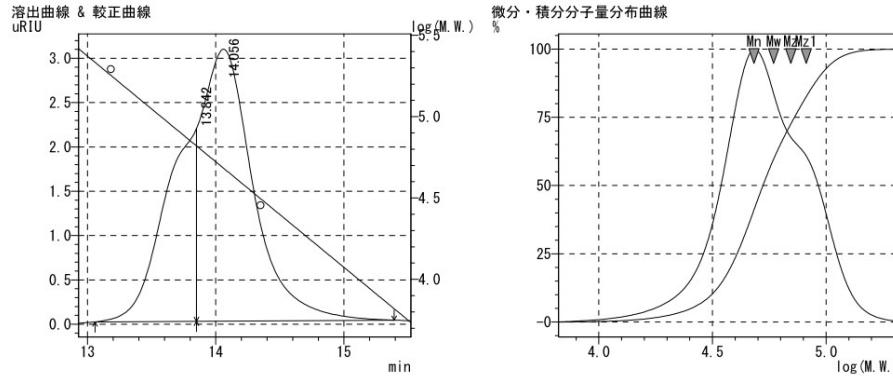

peak report

| 検出器A Ch1 | Peak# | retention tim | area   | height | area%   | height% |
|----------|-------|---------------|--------|--------|---------|---------|
|          | 1     | 13.842        | 39269  | 2148   | 31.838  | 41.186  |
|          | 2     | 14.056        | 84070  | 3068   | 68.162  | 58.814  |
| 合計       |       |               | 123340 | 5216   | 100.000 | 100.000 |

GC計算結果

Peak#:1 (検出器A Ch1)

[ピーク情報]

|    | time(min) | tion amount | (lecular weig | height |
|----|-----------|-------------|---------------|--------|
| 開始 | 13.058    | 10.447      | 215620        | 26     |
| 頂点 | 13.842    | 11.073      | 66886         | 2148   |
| 終了 | 13.850    | 11.080      | 66058         | 33     |

area : 39269  
 area% : 31.8382

[平均分子量]

|               |         |
|---------------|---------|
| NAMW (Mn)     | 85657   |
| WAMW (Mw)     | 89191   |
| ZAMW (Mz)     | 93563   |
| Z+1 AMW (Mz1) | 98927   |
| Mw/Mn         | 1.04126 |
| Mv/Mn         | 0.00000 |
| Mz/Mw         | 1.04902 |

Peak#:2 (検出器A Ch1)

[ピーク情報]

|    | time(min) | tion amount | (lecular weig | height |
|----|-----------|-------------|---------------|--------|
| 開始 | 13.850    | 11.080      | 66058         | 33     |
| 頂点 | 14.056    | 11.245      | 48541         | 3068   |
| 終了 | 15.392    | 12.313      | 6598          | 46     |

area : 84070  
 area% : 68.1618

[平均分子量]

D:\DATA\matsushiro\MTS-5027\_20211117.lcd

Figure S5. GPC chart of a sample for Table 2, entry 2.

## ==== Shimadzu LCsolution GPC Report ====

```

operator       : Admin
sample name    : NAG18155B
sample ID     : NAG18155B
vial No       : -1
Inj. Vol.     : 20 uL
data file     : NAG18155B-2.lcd
method file   : mashima-lab 解析用20220712-2.lcm
batch file    :
report file   : Default.lcr
acquisition data : 2022/07/13 13:33:36
modified data  : 2022/09/01 15:37:49
  
```

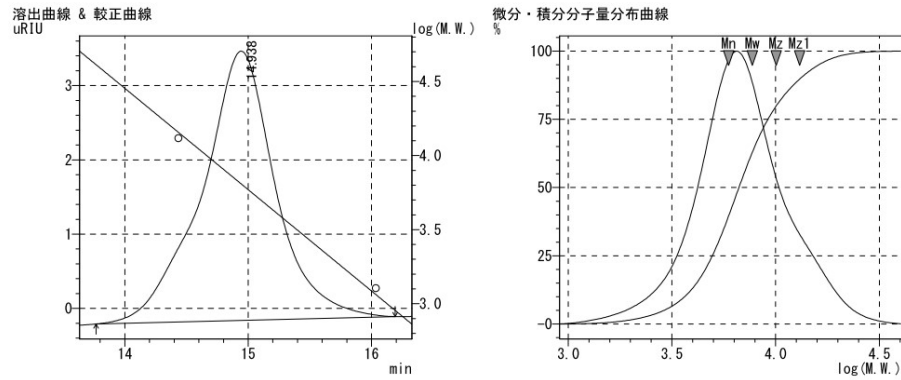

### peak report

| Peak# | retention tim | area   | height | area%   | height% |
|-------|---------------|--------|--------|---------|---------|
| 1     | 14.938        | 150433 | 3624   | 100.000 | 100.000 |
| 合計    |               | 150433 | 3624   | 100.000 | 100.000 |

### GPC計算結果

Peak#:1 (検出器A Ch1)

[ピーク情報]

|    | time (min) | tion   | amount (lecular weig | height |
|----|------------|--------|----------------------|--------|
| 開始 | 13.767     | 11.013 | 41069                | -208   |
| 頂点 | 14.938     | 11.951 | 6486                 | 3624   |
| 終了 | 16.192     | 12.953 | 901                  | -110   |

area : 150433  
area% : 100.0000

[平均分子量]

|               |         |
|---------------|---------|
| NAMW (Mn)     | 5941    |
| WAMW (Mw)     | 7725    |
| ZAMW (Mz)     | 10054   |
| Z+1 AMW (Mz1) | 13051   |
| Mw/Mn         | 1.30021 |
| Mv/Mn         | 0.00000 |
| Mz/Mw         | 1.30156 |

検出器A Ch1

[平均分子量(トータル)]

|               |         |
|---------------|---------|
| NAMW (Mn)     | 5941    |
| WAMW (Mw)     | 7725    |
| ZAMW (Mz)     | 10054   |
| Z+1 AMW (Mz1) | 13051   |
| Mw/Mn         | 1.30021 |
| Mv/Mn         | 0.00000 |
| Mz/Mw         | 1.30156 |

D:\DATA\nagae\NAG18155B-2.lcd

Figure S6. GPC chart of a sample for Table 2, entry 3.

==== Shimadzu LCsolution GPC Report ====

operator : Admin  
 sample name : MTS-5070  
 sample ID : MTS-5070  
 vial No : -1  
 Inj. Vol. : 20 uL  
 data file : MTS-5070.lcd  
 method file : mashima-lab 20220307.lcm  
 batch file :  
 report file : Default.lcr  
 acquisition data : 2022/03/07 18:49:55  
 modified data : 2022/03/08 12:56:45

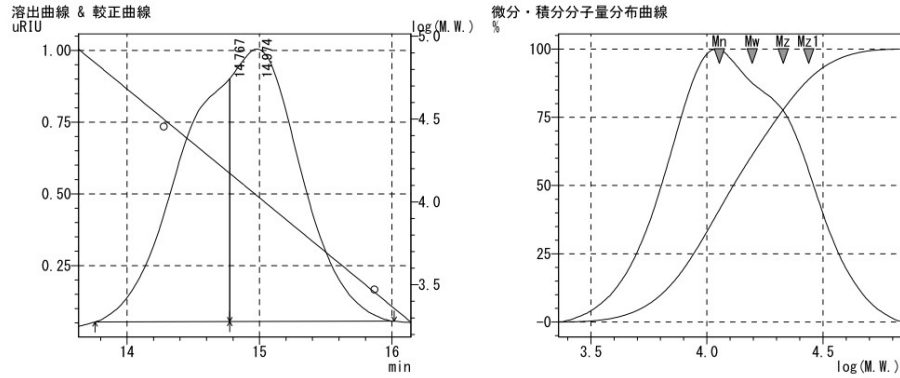

peak report

| 検出器A Ch1 | Peak# | retention tim | area  | height | area%   | height% |
|----------|-------|---------------|-------|--------|---------|---------|
|          | 1     | 14.767        | 24324 | 843    | 42.188  | 47.022  |
|          | 2     | 14.974        | 33331 | 950    | 57.812  | 52.978  |
|          | 合計    |               | 57655 | 1792   | 100.000 | 100.000 |

UPCAT 昇和系

Peak#:1 (検出器A Ch1)

[ピーク情報]

|    | time(min) | tion amount | (lecular weig | height |
|----|-----------|-------------|---------------|--------|
| 開始 | 13.758    | 11.007      | 69166         | 54     |
| 頂点 | 14.767    | 11.813      | 15069         | 843    |
| 終了 | 14.775    | 11.820      | 14880         | 55     |

area : 24324  
 area% : 42.1880

[平均分子量]

|               |         |
|---------------|---------|
| NAMW (Mn)     | 22056   |
| WAMW (Mw)     | 24237   |
| ZAMW (Mz)     | 27137   |
| Z+1 AMW (Mz1) | 30739   |
| Mw/Mn         | 1.09890 |
| Mv/Mn         | 0.00000 |
| Mz/Mw         | 1.11964 |

Peak#:2 (検出器A Ch1)

[ピーク情報]

|    | time(min) | tion amount | (lecular weig | height |
|----|-----------|-------------|---------------|--------|
| 開始 | 14.775    | 11.820      | 14880         | 55     |
| 頂点 | 14.974    | 11.979      | 11022         | 950    |
| 終了 | 16.017    | 12.813      | 2278          | 56     |

area : 33331  
 area% : 57.8120

[平均分子量]

D:\DATA\matsushiro\MTS-5070.lcd

Figure S7. GPC chart of a sample for Table 2, entry 5.

## ==== Shimadzu LCsolution GPC Report ====

```

operator       : Admin
sample name    : MTS-5062
sample ID     : MTS-5062
vial No       : -1
Inj. Vol.     : 20 uL
data file     : MTS-5062.lcd
method file   : mashima-lab 20220307.lcm
batch file    :
report file   : Default.lcr
acquisition data : 2022/03/07 21:54:36
modified data  : 2022/03/08 12:58:02
  
```

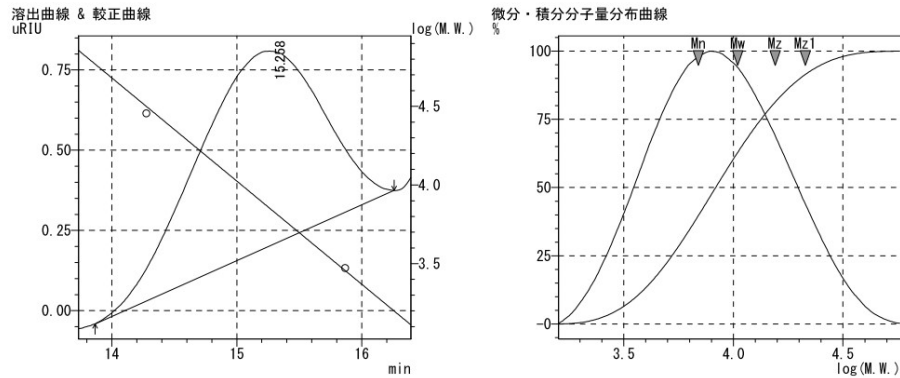

### peak report

| 検出器A Ch1 | Peak# | retention tim | area  | height | area%   | height% |
|----------|-------|---------------|-------|--------|---------|---------|
|          | 1     | 15.258        | 42823 | 608    | 100.000 | 100.000 |
|          | 合計    |               | 42823 | 608    | 100.000 | 100.000 |

### GPC計算結果

Peak#:1 (検出器A Ch1)

[ピーク情報]

|    | time(min) | tion amount | lecular weig | height |
|----|-----------|-------------|--------------|--------|
| 開始 | 13.867    | 11.093      | 58721        | -41    |
| 頂点 | 15.258    | 12.207      | 7169         | 608    |
| 終了 | 16.258    | 13.007      | 1581         | 375    |

area : 42823  
area% : 100.0000

[平均分子量]

|               |         |
|---------------|---------|
| NAMW (Mn)     | 6924    |
| WAMW (Mw)     | 10463   |
| ZAMW (Mz)     | 15531   |
| Z+1 AMW (Mz1) | 21302   |
| Mw/Mn         | 1.51107 |
| Mv/Mn         | 0.00000 |
| Mz/Mw         | 1.48438 |

検出器A Ch1

[平均分子量(トータル)]

|               |         |
|---------------|---------|
| NAMW (Mn)     | 6924    |
| WAMW (Mw)     | 10463   |
| ZAMW (Mz)     | 15531   |
| Z+1 AMW (Mz1) | 21302   |
| Mw/Mn         | 1.51107 |
| Mv/Mn         | 0.00000 |
| Mz/Mw         | 1.48438 |

D:\DATA\matsushiro\MTS-5062.lcd

Figure S8. GPC chart of a sample for Table 2, entry 7.

## ==== Shimadzu LCsolution GPC Report ====

```

operator       : Admin
sample name    : MTS-5029_20211117
sample ID     : MTS-5029_20211117
vial No       : -1
Inj. Vol.     : 20 uL
data file     : MTS-5029_20211117.lcd
method file   : mashima-lab 20211117.lcm
batch file    :
report file   : Default.lcr
acquisition data : 2021/11/17 23:09:26
modified data  : 2021/11/18 13:27:48
  
```

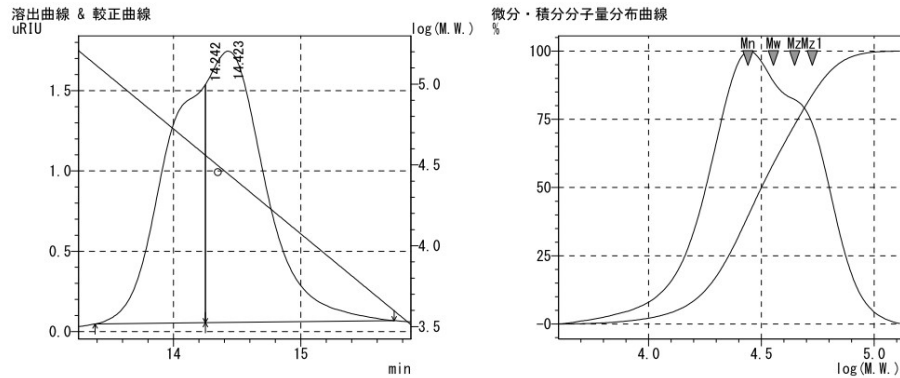

### peak report

| 検出器A Ch1 | Peak# | retention tim | area  | height | area%   | height% |
|----------|-------|---------------|-------|--------|---------|---------|
|          | 1     | 14.242        | 35455 | 1472   | 40.548  | 46.566  |
|          | 2     | 14.423        | 51984 | 1689   | 59.452  | 53.434  |
|          | 合計    |               | 87439 | 3161   | 100.000 | 100.000 |

### UPDT昇和系

Peak#:1 (検出器A Ch1)

[ピーク情報]

|    | time(min) | tion amount | (lecular weig | height |
|----|-----------|-------------|---------------|--------|
| 開始 | 13.383    | 10.707      | 132671        | 48     |
| 頂点 | 14.242    | 11.393      | 36792         | 1472   |
| 終了 | 14.250    | 11.400      | 36336         | 55     |

area : 35455  
area% : 40.5480

[平均分子量]

|               |         |
|---------------|---------|
| NAMW (Mn)     | 50075   |
| WAMW (Mw)     | 52997   |
| ZAMW (Mz)     | 56601   |
| Z+1 AMW (Mz1) | 60925   |
| Mw/Mn         | 1.05836 |
| Mv/Mn         | 0.00000 |
| Mz/Mw         | 1.06800 |

Peak#:2 (検出器A Ch1)

[ピーク情報]

|    | time(min) | tion amount | (lecular weig | height |
|----|-----------|-------------|---------------|--------|
| 開始 | 14.250    | 11.400      | 36336         | 55     |
| 頂点 | 14.423    | 11.539      | 28045         | 1689   |
| 終了 | 15.733    | 12.587      | 3960          | 68     |

area : 51984  
area% : 59.4520

[平均分子量]

D:\DATA\matsushiro\MTS-5029\_20211117.lcd

Figure S9. GPC chart of a sample for Table 2, entry 8.

==== Shimadzu LCsolution GPC Report ====

operator : Admin  
 sample name : MTS-6003  
 sample ID : MTS-6003  
 vial No : -1  
 Inj. Vol. : 20 uL  
 data file : MTS-6003.lcd  
 method file : mashima-lab 20220307.lcm  
 batch file :  
 report file : Default.lcr  
 acquisition data : 2022/03/07 19:43:21  
 modified data : 2022/03/08 12:57:13

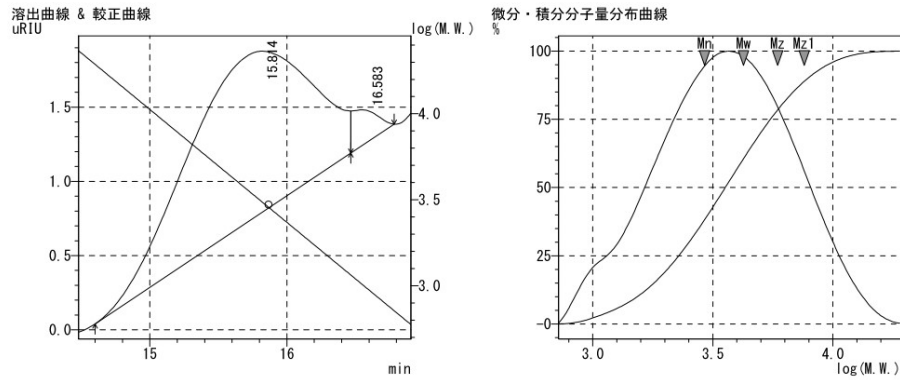

peak report

| 検出器A Ch1 | Peak# | retention tim | area  | height | area%   | height% |
|----------|-------|---------------|-------|--------|---------|---------|
|          | 1     | 15.814        | 70361 | 1089   | 95.901  | 83.454  |
|          | 2     | 16.583        | 3007  | 216    | 4.099   | 16.546  |
|          | 合計    |               | 73369 | 1304   | 100.000 | 100.000 |

UPCAT 昇和系

Peak#:1 (検出器A Ch1)

[ピーク情報]

|    | time(min) | tion amount | (ecular weig | height |
|----|-----------|-------------|--------------|--------|
| 開始 | 14.600    | 11.680      | 19385        | 40     |
| 頂点 | 15.814    | 12.651      | 3094         | 1089   |
| 終了 | 16.467    | 13.173      | 1154         | 1190   |

area : 70361  
 area% : 95.9009

[平均分子量]

|               |         |
|---------------|---------|
| NAMW (Mn)     | 3198    |
| WAMW (Mw)     | 4386    |
| ZAMW (Mz)     | 5938    |
| Z+1 AMW (Mz1) | 7612    |
| Mw/Mn         | 1.37147 |
| Mv/Mn         | 0.00000 |
| Mz/Mw         | 1.35370 |

Peak#:2 (検出器A Ch1)

[ピーク情報]

|    | time(min) | tion amount | (ecular weig | height |
|----|-----------|-------------|--------------|--------|
| 開始 | 16.467    | 13.173      | 1154         | 1190   |
| 頂点 | 16.583    | 13.267      | 968          | 216    |
| 終了 | 16.783    | 13.427      | 715          | 1385   |

area : 3007  
 area% : 4.0991

[平均分子量]

D:\DATA\matsushiro\MTS-6003.lcd

Figure S10. GPC chart of a sample for Table 2, entry 9.



## ==== Shimadzu LCsolution GPC Report ====

```

operator       : Admin
sample name    : MTS-5023-2
sample ID     : MTS-5023-2
vial No       : -1
Inj. Vol.     : 20 uL
data file     : MTS-5023-2.lcd
method file   : mashima-lab method.lcm
batch file    :
report file   : Default.lcr
acquisition data : 2022/01/25 0:40:12
modified data  : 2022/01/25 1:10:13
  
```

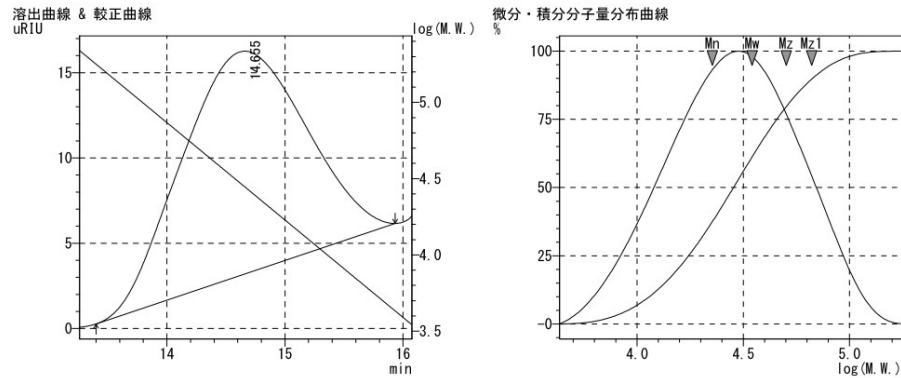

### peak report

| 検出器A Ch1 | Peak# | retention tim | area   | height | area%   | height% |
|----------|-------|---------------|--------|--------|---------|---------|
|          | 1     | 14.655        | 953778 | 13071  | 100.000 | 100.000 |
|          | 合計    |               | 953778 | 13071  | 100.000 | 100.000 |

### GPC計算結果

Peak#:1 (検出器A Ch1)

[ピーク情報]

|    | time (min) | tion amount | lecular weig | height |
|----|------------|-------------|--------------|--------|
| 開始 | 13.400     | 10.720      | 178090       | 270    |
| 頂点 | 14.655     | 11.724      | 28105        | 13071  |
| 終了 | 15.933     | 12.747      | 4291         | 6162   |

area : 953778  
area% : 100.0000

[平均分子量]

|               |         |
|---------------|---------|
| NAMW (Mn)     | 22590   |
| WAMW (Mw)     | 34811   |
| ZAMW (Mz)     | 50389   |
| Z+1 AMW (Mz1) | 66369   |
| Mw/Mn         | 1.54098 |
| Mv/Mn         | 0.00000 |
| Mz/Mw         | 1.44752 |

検出器A Ch1

[平均分子量(トータル)]

|               |         |
|---------------|---------|
| NAMW (Mn)     | 22590   |
| WAMW (Mw)     | 34811   |
| ZAMW (Mz)     | 50389   |
| Z+1 AMW (Mz1) | 66369   |
| Mw/Mn         | 1.54098 |
| Mv/Mn         | 0.00000 |
| Mz/Mw         | 1.44752 |

D:\DATA\matsushiro\MTS-5023-2.lcd

Figure S11. GPC chart of a sample for Table 2, entry 10.

## 6. DFT Calculations

The calculations were performed using the Gaussian 16<sup>S5</sup> program employing B3LYP functional, and using a standard double- $\xi$  polarized basis set, namely the LANL2DZ set for calcium and cobalt.<sup>S6</sup> The solvent effects, in our case  $\epsilon = 12.42$  for ethylene oxide, were taken into account during some the calculations for organic molecules and complexes by means of the IEFPCM model.<sup>S7</sup> All stationary points were fully characterized *via* analytical frequency calculations as either true minima (all positive eigenvalues) or transition states (one imaginary eigenvalue). Zero-point vibrational energy corrections (ZPVE) were estimated by a frequency calculation at the same level of theory, to be considered for the calculation of the total energy values. The multiplicity of all CaCo<sub>3</sub> complexes were determined as quartet because structures of quartet complexes showed the lowest energies among the doublet and sextet ones in the preliminary calculations.

## Cartesian coordinates

### PhMe<sub>2</sub>NH

Energy: -230105.7577880

|   |          |          |          |
|---|----------|----------|----------|
| H | 1.72006  | -1.39336 | -0.13122 |
| C | 2.23520  | 0.01849  | 1.26415  |
| H | 2.13118  | 1.09502  | 1.38579  |
| H | 1.73463  | -0.50609 | 2.07618  |
| H | 3.28790  | -0.25788 | 1.21495  |
| C | 2.24652  | 0.25356  | -1.22797 |
| H | 1.75643  | -0.11308 | -2.12831 |
| H | 2.14385  | 1.33406  | -1.15129 |
| H | 3.29904  | -0.02654 | -1.21809 |
| C | 0.10490  | -0.16853 | -0.01784 |
| C | -0.39921 | 1.12809  | 0.04917  |
| C | -0.72552 | -1.28362 | -0.06541 |
| C | -1.78266 | 1.30410  | 0.06284  |
| H | 0.25822  | 1.98925  | 0.08979  |
| C | -2.10823 | -1.09159 | -0.04967 |
| H | -0.31195 | -2.28690 | -0.11369 |
| C | -2.63560 | 0.19882  | 0.01284  |
| H | -2.19041 | 2.30786  | 0.11200  |
| H | -2.76640 | -1.95274 | -0.08722 |
| H | -3.71058 | 0.34456  | 0.02284  |
| N | 1.57652  | -0.38430 | -0.03435 |

### PhMe<sub>2</sub>N

Energy: -229824.4398274

|   |          |          |          |
|---|----------|----------|----------|
| C | 2.29321  | -1.24514 | 0.06394  |
| H | 2.10887  | -1.66991 | 1.06288  |
| H | 2.01590  | -1.99939 | -0.68026 |
| H | 3.36354  | -1.06367 | -0.03896 |
| C | 2.29334  | 1.24511  | 0.06399  |
| H | 2.01564  | 1.99954  | -0.67983 |
| H | 2.10970  | 1.66950  | 1.06321  |
| H | 3.36360  | 1.06356  | -0.03959 |
| C | 0.18570  | 0.00000  | -0.07492 |
| C | -0.55027 | 1.20907  | -0.03494 |
| C | -0.55018 | -1.20898 | -0.03493 |
| C | -1.94255 | 1.19902  | 0.01716  |
| H | -0.03815 | 2.16301  | -0.04382 |
| C | -1.94257 | -1.19899 | 0.01723  |
| H | -0.03818 | -2.16298 | -0.04392 |
| C | -2.65792 | -0.00005 | 0.04198  |
| H | -2.47153 | 2.14815  | 0.04438  |
| H | -2.47133 | -2.14824 | 0.04444  |
| H | -3.74242 | 0.00007  | 0.08564  |
| N | 1.57311  | 0.00002  | -0.16160 |

### Ethylene oxide

Energy: -96509.3187421

|   |          |          |          |
|---|----------|----------|----------|
| C | -0.66763 | -0.48411 | 0.00000  |
| C | 0.00000  | 0.82378  | 0.00000  |
| O | 0.76741  | -0.39087 | 0.00000  |
| H | -1.11145 | -0.86159 | 0.92071  |
| H | -1.11145 | -0.86159 | -0.92071 |

|   |         |         |          |
|---|---------|---------|----------|
| H | 0.04471 | 1.40607 | 0.92003  |
| H | 0.04471 | 1.40607 | -0.92003 |

### AcOH (dimer)

Energy: -287544.0304831

|   |          |          |          |
|---|----------|----------|----------|
| C | 1.91245  | 0.05626  | 0.00006  |
| O | 1.24206  | 1.09258  | 0.00007  |
| C | 3.41611  | 0.06192  | -0.00016 |
| H | 3.78724  | 1.08560  | 0.00000  |
| H | 3.78293  | -0.47186 | 0.88112  |
| H | 3.78262  | -0.47139 | -0.88187 |
| O | 1.39227  | -1.15690 | 0.00014  |
| H | 0.38612  | -1.10936 | 0.00018  |
| C | -1.91245 | -0.05626 | -0.00000 |
| O | -1.24208 | -1.09261 | -0.00002 |
| C | -3.41611 | -0.06188 | -0.00011 |
| H | -3.78281 | 0.47176  | 0.88132  |
| H | -3.78271 | 0.47159  | -0.88167 |
| H | -3.78726 | -1.08555 | -0.00003 |
| O | -1.39225 | 1.15688  | 0.00007  |
| H | -0.38611 | 1.10931  | 0.00016  |

### CO<sub>2</sub>

Energy: -118337.7952731

|   |         |         |          |
|---|---------|---------|----------|
| O | 0.00000 | 0.00000 | 1.16911  |
| C | 0.00000 | 0.00000 | 0.00000  |
| O | 0.00000 | 0.00000 | -1.16911 |

### A1

Energy: -1992007.5553814

|   |          |          |          |
|---|----------|----------|----------|
| O | 0.02115  | 2.45204  | -0.06951 |
| O | -2.21645 | 1.35369  | -0.41383 |
| O | -2.35039 | -1.17823 | -0.73653 |
| O | -0.24744 | -2.61133 | -0.34325 |
| O | 2.02918  | -1.48697 | -0.07463 |
| O | 2.07886  | 1.02472  | 0.40441  |
| O | 3.93737  | 0.13146  | -1.74268 |
| O | 6.18837  | 0.36996  | -1.84814 |
| O | -0.93449 | -0.73361 | 2.08653  |
| O | -2.30028 | -2.52846 | 1.89300  |
| N | -1.12573 | 4.96944  | -0.31047 |
| N | -3.47581 | 3.82732  | -0.50930 |
| N | -3.94144 | -3.44480 | -0.59998 |
| N | -1.83016 | -4.86405 | 0.03535  |
| N | 4.70303  | -1.69784 | 0.68151  |
| N | 4.74757  | 0.87813  | 1.14780  |
| C | -2.18838 | 5.87717  | -0.76563 |
| H | -2.14923 | 5.92911  | -1.86111 |
| C | -3.53633 | 5.28614  | -0.33015 |
| H | -3.69532 | 5.48969  | 0.73597  |
| C | -4.54583 | 3.11519  | -0.69657 |
| H | -5.50284 | 3.63525  | -0.79974 |
| C | -4.58687 | 1.67361  | -0.76728 |
| C | -5.84853 | 1.01530  | -0.94249 |
| H | -6.74384 | 1.62295  | -1.03986 |
| C | -5.93477 | -0.35171 | -0.96362 |
| H | -6.90143 | -0.83678 | -1.06787 |
| C | -4.76623 | -1.17218 | -0.84424 |

|    |          |          |          |                          |          |          |          |
|----|----------|----------|----------|--------------------------|----------|----------|----------|
| C  | -3.49758 | -0.55674 | -0.74966 | H                        | -5.15881 | -5.19139 | -0.43708 |
| C  | -3.41749 | 0.88958  | -0.64040 | H                        | -4.36386 | 5.73219  | -0.89280 |
| C  | -4.90392 | -2.61000 | -0.84267 | H                        | -2.05555 | 6.89066  | -0.37111 |
| H  | -5.90048 | -3.00860 | -1.05659 | O                        | -2.00692 | 3.36463  | 2.09171  |
| C  | -4.14086 | -4.89711 | -0.71635 | C                        | -3.10063 | 2.75939  | 2.81592  |
| H  | -3.97683 | -5.18594 | -1.76257 | C                        | -1.71644 | 2.36055  | 3.09713  |
| C  | -3.10051 | -5.58858 | 0.17213  | H                        | -3.73255 | 2.10511  | 2.22034  |
| H  | -3.41576 | -5.52287 | 1.22083  | H                        | -3.61972 | 3.43443  | 3.49285  |
| C  | 0.59752  | -4.80505 | 0.21932  | H                        | -1.34840 | 1.40991  | 2.71649  |
| C  | 1.76500  | -5.57249 | 0.53383  | H                        | -1.21997 | 2.75688  | 3.98051  |
| H  | 1.65845  | -6.64187 | 0.69411  | C                        | -0.68936 | -5.45938 | 0.19997  |
| C  | 2.99104  | -4.97325 | 0.65833  | H                        | -0.68837 | -6.54008 | 0.37295  |
| H  | 3.86501  | -5.56533 | 0.91616  |                          |          |          |          |
| C  | 3.14964  | -3.56146 | 0.47906  |                          |          |          |          |
| C  | 2.02695  | -2.78128 | 0.12130  |                          |          |          |          |
| C  | 0.72891  | -3.41773 | -0.01616 |                          |          |          |          |
| C  | 4.44745  | -2.96661 | 0.71661  |                          |          |          |          |
| H  | 5.26305  | -3.65535 | 0.95861  |                          |          |          |          |
| C  | 6.05034  | -1.15954 | 0.89472  |                          |          |          |          |
| H  | 6.45368  | -0.91462 | -0.09393 |                          |          |          |          |
| C  | 5.90846  | 0.15047  | 1.68220  |                          |          |          |          |
| H  | 5.71667  | -0.06855 | 2.74094  |                          |          |          |          |
| C  | 4.64387  | 2.16344  | 1.25639  |                          |          |          |          |
| H  | 5.48094  | 2.72194  | 1.68710  |                          |          |          |          |
| C  | 3.48133  | 2.93826  | 0.87431  |                          |          |          |          |
| C  | 3.53828  | 4.36673  | 0.94338  |                          |          |          |          |
| H  | 4.47593  | 4.83604  | 1.22838  |                          |          |          |          |
| C  | 2.44301  | 5.13786  | 0.65122  |                          |          |          |          |
| H  | 2.50826  | 6.22153  | 0.69387  |                          |          |          |          |
| C  | 1.19229  | 4.53862  | 0.29420  |                          |          |          |          |
| C  | 1.10019  | 3.12934  | 0.23557  |                          |          |          |          |
| C  | 2.26869  | 2.31474  | 0.50628  |                          |          |          |          |
| C  | 0.07321  | 5.38711  | -0.04394 |                          |          |          |          |
| H  | 0.27133  | 6.46224  | -0.08930 |                          |          |          |          |
| C  | 5.03425  | 0.45179  | -2.32118 |                          |          |          |          |
| C  | 4.87121  | 0.98339  | -3.75684 |                          |          |          |          |
| H  | 4.21209  | 1.85804  | -3.76242 |                          |          |          |          |
| H  | 4.39871  | 0.22146  | -4.38656 |                          |          |          |          |
| H  | 5.83624  | 1.25560  | -4.18964 |                          |          |          |          |
| C  | -1.72968 | -1.61154 | 2.54800  |                          |          |          |          |
| C  | -2.01840 | -1.53905 | 4.04954  |                          |          |          |          |
| H  | -1.08132 | -1.62325 | 4.60960  |                          |          |          |          |
| H  | -2.70306 | -2.32662 | 4.36876  |                          |          |          |          |
| H  | -2.45067 | -0.56291 | 4.29372  |                          |          |          |          |
| Ca | -0.13389 | -0.10849 | -0.09619 |                          |          |          |          |
| Co | 3.45321  | -0.29456 | 0.36346  |                          |          |          |          |
| Co | -2.10500 | -3.00101 | -0.27016 |                          |          |          |          |
| Co | -1.71527 | 3.16046  | -0.24499 |                          |          |          |          |
| O  | -0.02673 | -0.00080 | -2.61431 |                          |          |          |          |
| C  | 0.31123  | -1.16345 | -3.40741 |                          |          |          |          |
| H  | -0.39146 | -1.37268 | -4.21077 |                          |          |          |          |
| H  | 0.63761  | -2.02014 | -2.82414 |                          |          |          |          |
| C  | 1.15217  | 0.03744  | -3.46777 |                          |          |          |          |
| H  | 2.10099  | 0.06691  | -2.93189 |                          |          |          |          |
| H  | 1.04502  | 0.70746  | -4.31837 |                          |          |          |          |
| H  | 6.69934  | -1.87191 | 1.41772  |                          |          |          |          |
| H  | 6.82398  | 0.74892  | 1.61769  |                          |          |          |          |
| H  | -2.99882 | -6.64790 | -0.08994 |                          |          |          |          |
|    |          |          |          | <b>A2</b>                |          |          |          |
|    |          |          |          | Energy: -1992009.3268344 |          |          |          |
|    |          |          |          | O                        | -0.86651 | -2.29007 | 0.02693  |
|    |          |          |          | O                        | -2.43457 | -0.32374 | 0.16663  |
|    |          |          |          | O                        | -1.50039 | 2.04505  | 0.52558  |
|    |          |          |          | O                        | 1.06097  | 2.44774  | 0.39472  |
|    |          |          |          | O                        | 2.59640  | 0.44997  | -0.00519 |
|    |          |          |          | O                        | 1.60242  | -1.87969 | -0.46783 |
|    |          |          |          | O                        | 3.39959  | -1.69134 | 1.89766  |
|    |          |          |          | O                        | 1.35707  | -0.84227 | 2.38654  |
|    |          |          |          | O                        | -0.09255 | 0.83689  | -1.93025 |
|    |          |          |          | O                        | -0.54885 | 3.05604  | -2.03913 |
|    |          |          |          | N                        | -2.99685 | -4.05995 | 0.15352  |
|    |          |          |          | N                        | -4.63603 | -2.01669 | 0.12505  |
|    |          |          |          | N                        | -1.94916 | 4.76122  | 0.23856  |
|    |          |          |          | N                        | 0.61625  | 5.13486  | -0.14989 |
|    |          |          |          | N                        | 5.15534  | -0.54325 | -0.33064 |
|    |          |          |          | N                        | 4.15316  | -2.92483 | -0.77064 |
|    |          |          |          | C                        | -4.38063 | -4.40562 | 0.50743  |
|    |          |          |          | H                        | -4.46310 | -4.41966 | 1.60180  |
|    |          |          |          | C                        | -5.30071 | -3.31505 | -0.05919 |
|    |          |          |          | H                        | -5.43750 | -3.47838 | -1.13537 |
|    |          |          |          | C                        | -5.30684 | -0.90635 | 0.20660  |
|    |          |          |          | H                        | -6.39975 | -0.96214 | 0.21261  |
|    |          |          |          | C                        | -4.73111 | 0.41373  | 0.28174  |
|    |          |          |          | C                        | -5.60170 | 1.55379  | 0.33113  |
|    |          |          |          | H                        | -6.67569 | 1.38902  | 0.32754  |
|    |          |          |          | C                        | -5.09718 | 2.82549  | 0.35660  |
|    |          |          |          | H                        | -5.76795 | 3.68045  | 0.36357  |
|    |          |          |          | C                        | -3.68324 | 3.06442  | 0.37047  |
|    |          |          |          | C                        | -2.79258 | 1.96529  | 0.40618  |
|    |          |          |          | C                        | -3.33018 | 0.61607  | 0.28428  |
|    |          |          |          | C                        | -3.19480 | 4.42098  | 0.37245  |
|    |          |          |          | H                        | -3.94190 | 5.21250  | 0.48990  |
|    |          |          |          | C                        | -1.52608 | 6.16358  | 0.36324  |
|    |          |          |          | H                        | -1.36485 | 6.38487  | 1.42641  |
|    |          |          |          | C                        | -0.20586 | 6.32668  | -0.39688 |
|    |          |          |          | H                        | -0.41062 | 6.37812  | -1.47365 |
|    |          |          |          | C                        | 2.79238  | 4.04904  | -0.13659 |
|    |          |          |          | C                        | 4.19901  | 4.23086  | -0.35568 |
|    |          |          |          | H                        | 4.57693  | 5.24064  | -0.49169 |
|    |          |          |          | C                        | 5.05288  | 3.16131  | -0.40762 |
|    |          |          |          | H                        | 6.11636  | 3.31674  | -0.56891 |
|    |          |          |          | C                        | 4.56692  | 1.81810  | -0.27962 |
|    |          |          |          | C                        | 3.18413  | 1.60681  | -0.06752 |

|    |          |          |          |                          |          |          |          |
|----|----------|----------|----------|--------------------------|----------|----------|----------|
| C  | 2.29199  | 2.74653  | 0.08394  | <b>A1-EO</b>             |          |          |          |
| C  | 5.48710  | 0.71185  | -0.38004 | Energy: -1895496.0483908 |          |          |          |
| H  | 6.54587  | 0.96460  | -0.49621 | O                        | 1.79912  | 1.91117  | 0.13373  |
| C  | 6.15757  | -1.61296 | -0.35147 | O                        | -0.62827 | 2.49885  | -0.20395 |
| H  | 6.34551  | -1.92039 | 0.68458  | O                        | -2.34884 | 0.64074  | -0.55498 |
| C  | 5.57119  | -2.79613 | -1.13482 | O                        | -1.74056 | -1.78788 | 0.05514  |
| H  | 5.63499  | -2.58559 | -2.21031 | O                        | 0.70477  | -2.43318 | 0.38460  |
| C  | 3.52368  | -4.05323 | -0.88174 | O                        | 2.50782  | -0.55415 | 0.45840  |
| H  | 4.09107  | -4.94127 | -1.17829 | O                        | 2.29252  | -1.94737 | -2.09790 |
| C  | 2.11013  | -4.23672 | -0.64813 | O                        | 0.62615  | -0.41502 | -1.95706 |
| C  | 1.56063  | -5.55996 | -0.66568 | O                        | -1.57351 | 0.16101  | 2.31651  |
| H  | 2.23115  | -6.39835 | -0.83470 | O                        | -3.69853 | -0.47411 | 1.85613  |
| C  | 0.22261  | -5.77765 | -0.46905 | N                        | 2.52842  | 4.54015  | -0.33910 |
| H  | -0.17640 | -6.78819 | -0.48240 | N                        | 0.00580  | 5.18369  | -0.35657 |
| C  | -0.67834 | -4.68610 | -0.23897 | N                        | -5.01142 | -0.08807 | -0.85545 |
| C  | -0.16745 | -3.36843 | -0.21355 | N                        | -4.37591 | -2.55774 | -0.26992 |
| C  | 1.24787  | -3.13238 | -0.45024 | N                        | 2.67180  | -4.30626 | -0.21237 |
| C  | -2.07411 | -4.96102 | 0.00877  | N                        | 4.49307  | -2.45335 | 0.07815  |
| H  | -2.36000 | -6.01467 | 0.08500  | C                        | 2.28209  | 5.94628  | -0.69929 |
| C  | 2.45700  | -1.38990 | 2.68855  | H                        | 2.28823  | 6.02568  | -1.79372 |
| C  | 2.66988  | -1.72753 | 4.16970  | C                        | 0.89938  | 6.33501  | -0.16597 |
| H  | 3.64641  | -2.18261 | 4.34534  | H                        | 0.96520  | 6.54158  | 0.90983  |
| H  | 1.88689  | -2.41430 | 4.50858  | C                        | -1.27093 | 5.33188  | -0.55286 |
| H  | 2.58105  | -0.81813 | 4.77328  | H                        | -1.66376 | 6.34854  | -0.64361 |
| C  | -0.33986 | 1.91416  | -2.54776 | C                        | -2.22279 | 4.25851  | -0.66433 |
| C  | -0.39512 | 1.82329  | -4.07804 | C                        | -3.59561 | 4.56578  | -0.94255 |
| H  | 0.54566  | 1.41279  | -4.45934 | H                        | -3.88285 | 5.60650  | -1.06259 |
| H  | -0.57747 | 2.79704  | -4.53655 | C                        | -4.52893 | 3.57072  | -1.05296 |
| H  | -1.19019 | 1.13112  | -4.37574 | H                        | -5.56738 | 3.81621  | -1.25852 |
| Ca | 0.12431  | 0.06793  | 0.41485  | C                        | -4.16958 | 2.19235  | -0.90321 |
| Co | 3.38320  | -1.25078 | -0.24857 | C                        | -2.81911 | 1.84890  | -0.65340 |
| Co | -0.45078 | 3.56913  | 0.11117  | C                        | -1.83743 | 2.90965  | -0.49701 |
| Co | -2.74506 | -2.17531 | 0.03497  | C                        | -5.18600 | 1.17936  | -1.06517 |
| O  | -1.32482 | 0.26068  | 2.85731  | H                        | -6.16986 | 1.52379  | -1.39916 |
| C  | -0.72248 | 0.62355  | 4.11559  | C                        | -6.06735 | -1.06511 | -1.15876 |
| H  | -1.27237 | 1.37198  | 4.68326  | H                        | -5.99452 | -1.33545 | -2.22014 |
| H  | 0.35792  | 0.72779  | 4.07663  | C                        | -5.82035 | -2.31297 | -0.29977 |
| C  | -1.29749 | -0.71179 | 3.92133  | H                        | -6.15290 | -2.11985 | 0.72743  |
| H  | -0.62007 | -1.54220 | 3.74546  | C                        | -2.47675 | -4.07557 | -0.18822 |
| H  | -2.27200 | -0.94702 | 4.34578  | C                        | -2.05105 | -5.43941 | -0.30511 |
| H  | 7.10593  | -1.28107 | -0.79024 | H                        | -2.80507 | -6.21026 | -0.44024 |
| H  | 6.12810  | -3.71861 | -0.93461 | C                        | -0.72230 | -5.76900 | -0.28018 |
| H  | 0.30853  | 7.24871  | -0.10228 | H                        | -0.41063 | -6.80180 | -0.41095 |
| H  | -2.28853 | 6.85372  | -0.01590 | C                        | 0.28782  | -4.76581 | -0.10258 |
| H  | -6.28561 | -3.34140 | 0.42039  | C                        | -0.09947 | -3.42433 | 0.11253  |
| H  | -4.66275 | -5.39550 | 0.13158  | C                        | -1.50404 | -3.06469 | -0.00424 |
| O  | -2.86139 | -2.31721 | -2.30874 | C                        | 1.67599  | -5.13821 | -0.21255 |
| C  | -3.36967 | -1.24703 | -3.13648 | H                        | 1.88749  | -6.20231 | -0.35823 |
| C  | -1.95106 | -1.61873 | -3.19658 | C                        | 4.03676  | -4.75983 | -0.50856 |
| H  | -3.66176 | -0.35278 | -2.59178 | H                        | 4.18841  | -4.68840 | -1.59298 |
| H  | -4.05104 | -1.57135 | -3.92006 | C                        | 5.01454  | -3.82095 | 0.20367  |
| H  | -1.21772 | -0.98457 | -2.70315 | H                        | 5.05791  | -4.07920 | 1.26980  |
| H  | -1.59786 | -2.22695 | -4.02679 | C                        | 5.28200  | -1.42599 | 0.12546  |
| C  | 1.91233  | 5.18988  | -0.20046 | H                        | 6.36198  | -1.59730 | 0.17533  |
| H  | 2.38512  | 6.16549  | -0.35189 | C                        | 4.84403  | -0.05228 | 0.10423  |
|    |          |          |          | C                        | 5.82363  | 0.98162  | -0.04578 |
|    |          |          |          | H                        | 6.87059  | 0.69814  | -0.11124 |
|    |          |          |          | C                        | 5.45897  | 2.29696  | -0.12617 |

|    |          |          |          |   |          |          |          |
|----|----------|----------|----------|---|----------|----------|----------|
| H  | 6.20976  | 3.07174  | -0.25269 | C | -5.33646 | 0.24493  | -0.74327 |
| C  | 4.07743  | 2.67806  | -0.07943 | H | -6.41972 | 0.16010  | -0.87169 |
| C  | 3.08606  | 1.68471  | 0.10268  | C | -4.58386 | -0.98510 | -0.80018 |
| C  | 3.47527  | 0.28744  | 0.23890  | C | -5.27941 | -2.22304 | -0.99846 |
| C  | 3.73626  | 4.06055  | -0.27711 | H | -6.35973 | -2.20098 | -1.11153 |
| H  | 4.57170  | 4.75358  | -0.41206 | C | -4.60507 | -3.41492 | -1.02414 |
| C  | 1.45701  | -1.12794 | -2.58828 | H | -5.14848 | -4.34780 | -1.14703 |
| C  | 1.44847  | -0.99081 | -4.11667 | C | -3.17967 | -3.46525 | -0.88889 |
| H  | 0.46830  | -1.28803 | -4.50511 | C | -2.45350 | -2.25761 | -0.76975 |
| H  | 2.22049  | -1.60414 | -4.58537 | C | -3.17828 | -1.00351 | -0.64840 |
| H  | 1.59829  | 0.05740  | -4.39556 | C | -2.51076 | -4.74554 | -0.90840 |
| C  | -2.77914 | -0.06505 | 2.62609  | H | -3.12597 | -5.61690 | -1.15401 |
| C  | -3.17650 | 0.20251  | 4.08314  | C | -0.62426 | -6.24945 | -0.80506 |
| H  | -2.45416 | -0.25947 | 4.76279  | H | -0.33543 | -6.37683 | -1.85634 |
| H  | -4.17893 | -0.16975 | 4.30324  | C | 0.63238  | -6.28256 | 0.07452  |
| H  | -3.15266 | 1.28170  | 4.27309  | H | 0.34005  | -6.43042 | 1.12156  |
| Ca | -0.00022 | 0.02998  | 0.37791  | C | 3.31235  | -3.61508 | 0.05596  |
| Co | 2.57587  | -2.41040 | 0.03889  | C | 4.74394  | -3.60803 | 0.16210  |
| Co | -3.39214 | -0.92163 | -0.26029 | H | 5.26724  | -4.55978 | 0.19764  |
| Co | 0.92927  | 3.53736  | -0.18123 | C | 5.44778  | -2.43269 | 0.20680  |
| H  | 4.19764  | -5.80159 | -0.20819 | H | 6.53306  | -2.44766 | 0.25952  |
| H  | 6.02538  | -3.91096 | -0.21013 | C | 4.77880  | -1.16256 | 0.19347  |
| H  | -6.37661 | -3.17474 | -0.68703 | C | 3.36836  | -1.13935 | 0.15088  |
| H  | -7.06651 | -0.65200 | -0.98002 | C | 2.63160  | -2.38035 | -0.01104 |
| H  | 0.51880  | 7.23271  | -0.66516 | C | 5.54286  | 0.06146  | 0.19737  |
| H  | 3.05951  | 6.60833  | -0.30324 | H | 6.63251  | -0.04088 | 0.21503  |
| O  | 1.26430  | 0.66315  | 2.83153  | C | 5.88883  | 2.44638  | 0.01826  |
| C  | 0.69908  | 1.39433  | 3.93827  | H | 5.98141  | 2.68524  | -1.04850 |
| C  | 0.96719  | -0.04318 | 4.05264  | C | 5.19789  | 3.60896  | 0.74252  |
| H  | -0.32641 | 1.71393  | 3.78016  | H | 5.35068  | 3.50509  | 1.82454  |
| H  | 1.37782  | 2.10759  | 4.40254  | C | 2.99081  | 4.56775  | 0.52892  |
| H  | 0.12972  | -0.73088 | 3.97601  | H | 3.45234  | 5.54537  | 0.70030  |
| H  | 1.84099  | -0.38937 | 4.60156  | C | 1.55401  | 4.54663  | 0.38010  |
| C  | -3.88041 | -3.75789 | -0.28092 | C | 0.84527  | 5.78648  | 0.27237  |
| H  | -4.57011 | -4.60401 | -0.36280 | H | 1.41038  | 6.71357  | 0.31574  |

## A2-EO

Energy: -1895502.2646753

|   |          |          |          |    |          |          |          |
|---|----------|----------|----------|----|----------|----------|----------|
| O | -1.17061 | 2.18525  | 0.05305  | C  | -0.51279 | 5.81381  | 0.09980  |
| O | -2.43191 | 0.03922  | -0.39251 | H  | -1.03525 | 6.76183  | 0.00637  |
| O | -1.15391 | -2.15453 | -0.74555 | C  | -1.27159 | 4.60069  | 0.01486  |
| O | 1.35532  | -2.22363 | -0.20902 | C  | -0.60479 | 3.36022  | 0.14394  |
| O | 2.61985  | -0.07803 | 0.23644  | C  | 0.83254  | 3.33024  | 0.36287  |
| O | 1.34916  | 2.14200  | 0.52118  | C  | -2.68234 | 4.67982  | -0.27634 |
| O | 2.88659  | 1.86070  | -2.00161 | H  | -3.08948 | 5.68355  | -0.43203 |
| O | 0.94867  | 0.71092  | -2.25034 | C  | 1.94434  | 1.36289  | -2.68557 |
| O | -0.30947 | -1.03730 | 2.07430  | C  | 2.00300  | 1.57643  | -4.20273 |
| O | -0.45543 | -3.29146 | 1.88678  | H  | 1.92391  | 0.61332  | -4.71700 |
| N | -3.48449 | 3.66616  | -0.39697 | H  | 2.92386  | 2.07742  | -4.50690 |
| N | -4.83146 | 1.42518  | -0.54711 | H  | 1.14544  | 2.18009  | -4.51960 |
| N | -1.25203 | -4.92795 | -0.65399 | C  | -0.49415 | -2.20581 | 2.53457  |
| N | 1.29743  | -4.97838 | -0.02998 | C  | -0.80052 | -2.30089 | 4.03277  |
| N | 5.03664  | 1.25741  | 0.14404  | H  | -0.00254 | -1.81672 | 4.60496  |
| N | 3.75626  | 3.52311  | 0.46939  | H  | -0.90578 | -3.33677 | 4.36019  |
| C | -4.87381 | 3.83652  | -0.85265 | H  | -1.72626 | -1.75798 | 4.25218  |
| H | -4.87330 | 3.88301  | -1.94909 | Ca | 0.12664  | -0.03480 | -0.09332 |
| C | -5.67977 | 2.61574  | -0.39300 | Co | 3.18049  | 1.71936  | 0.19568  |
| H | -5.92495 | 2.72028  | 0.67108  | Co | 0.03349  | -3.56300 | -0.26377 |
|   |          |          |          | Co | -3.00148 | 1.83120  | -0.22637 |
|   |          |          |          | H  | 6.89462  | 2.27548  | 0.41918  |
|   |          |          |          | H  | 5.61459  | 4.57346  | 0.43094  |

|   |          |          |          |   |         |          |          |
|---|----------|----------|----------|---|---------|----------|----------|
| H | 1.29459  | -7.10617 | -0.21652 | C | 0.63066 | -5.42915 | -0.27754 |
| H | -1.31365 | -7.05924 | -0.54075 | H | 0.62230 | -6.52032 | -0.33716 |
| H | -6.61610 | 2.52554  | -0.95473 | C | 3.03717 | -5.58827 | -0.38859 |
| H | -5.31463 | 4.76473  | -0.47256 | H | 3.25643 | -5.67639 | -1.45934 |
| O | -3.42630 | 1.86001  | 2.08407  | C | 4.15275 | -4.80173 | 0.30243  |
| C | -4.01657 | 0.75255  | 2.80057  | H | 4.10998 | -4.96778 | 1.38544  |
| C | -2.63830 | 1.16822  | 3.08642  | C | 4.90161 | -2.51388 | 0.05759  |
| H | -4.18976 | -0.13598 | 2.19842  | H | 5.91620 | -2.90161 | 0.18116  |
| H | -4.82083 | 1.03280  | 3.47730  | C | 4.76630 | -1.09159 | -0.06331 |
| H | -1.81251 | 0.57245  | 2.70297  | C | 5.93990 | -0.26695 | -0.07255 |
| H | -2.43833 | 1.76537  | 3.97371  | H | 6.91340 | -0.74445 | -0.01333 |
| C | 2.59055  | -4.86439 | 0.03574  | C | 5.83908 | 1.09403  | -0.15402 |
| H | 3.18862  | -5.77806 | 0.10997  | H | 6.73438 | 1.70890  | -0.16462 |

### B1

Energy: -1848532.9274194

|   |          |          |          |                          |          |          |          |
|---|----------|----------|----------|--------------------------|----------|----------|----------|
| O | 2.16671  | 1.42903  | -0.27014 | C                        | 4.51562  | 3.18200  | -0.32725 |
| O | -0.08154 | 2.55889  | -0.09556 | H                        | 5.47687  | 3.69793  | -0.40074 |
| O | -2.16355 | 1.13674  | -0.45520 | C                        | -2.51829 | 0.00732  | 2.65471  |
| O | -1.98397 | -1.40885 | -0.32727 | C                        | -2.77227 | 0.09274  | 4.16234  |
| O | 0.29668  | -2.54383 | -0.23986 | H                        | -2.19169 | -0.67508 | 4.68315  |
| O | 2.35682  | -1.13133 | -0.14598 | H                        | -3.83068 | -0.02508 | 4.40091  |
| O | -1.30653 | 0.02731  | 2.28238  | H                        | -2.42861 | 1.06367  | 4.53574  |
| O | -3.53494 | -0.06669 | 1.90574  | Ca                       | 0.02387  | 0.03240  | 0.22589  |
| N | 3.43175  | 3.89721  | -0.35457 | Co                       | 2.08680  | -2.97235 | -0.15303 |
| N | 1.10074  | 5.05373  | -0.12137 | Co                       | -3.46684 | -0.22155 | -0.27913 |
| N | -4.92523 | 0.97791  | -0.60148 | Co                       | 1.65767  | 3.23901  | -0.21260 |
| N | -4.75501 | -1.62652 | -0.30603 | O                        | 0.15636  | 0.11129  | -2.35114 |
| N | 1.78447  | -4.82630 | -0.24166 | C                        | -0.21454 | -0.94225 | -3.26634 |
| N | 3.91693  | -3.37062 | 0.04714  | H                        | -0.89063 | -0.63212 | -4.05961 |
| C | 3.46817  | 5.35158  | -0.57904 | H                        | -0.43759 | -1.89301 | -2.79155 |
| H | 3.42233  | 5.53005  | -1.66046 | C                        | 1.15925  | -0.42670 | -3.23984 |
| C | 2.23483  | 5.96562  | 0.09481  | H                        | 1.93732  | -1.00113 | -2.74503 |
| H | 2.40880  | 6.04591  | 1.17505  | H                        | 1.48892  | 0.26238  | -4.01391 |
| C | -0.12590 | 5.48170  | -0.16755 | H                        | 2.94499  | -6.59675 | 0.02722  |
| H | -0.29811 | 6.56017  | -0.11296 | H                        | 5.13872  | -5.11735 | -0.05458 |
| C | -1.29317 | 4.64383  | -0.28584 | H                        | -6.86514 | -1.79044 | -0.59753 |
| C | -2.58790 | 5.24634  | -0.41554 | H                        | -7.05572 | 0.83087  | -0.58738 |
| H | -2.66013 | 6.33004  | -0.42763 | H                        | 2.02946  | 6.96835  | -0.29462 |
| C | -3.71614 | 4.47622  | -0.52167 | H                        | 4.39231  | 5.79737  | -0.19645 |
| H | -4.69072 | 4.94740  | -0.61484 | O                        | 1.60154  | 0.18627  | 2.38270  |
| C | -3.64529 | 3.04560  | -0.51652 | C                        | 1.31476  | 0.90769  | 3.60176  |
| C | -2.38222 | 2.41986  | -0.41168 | C                        | 1.40089  | -0.55592 | 3.60634  |
| C | -1.19319 | 3.23672  | -0.25636 | H                        | 0.32960  | 1.36354  | 3.62385  |
| C | -4.85593 | 2.27104  | -0.67315 | H                        | 2.14647  | 1.49876  | 3.97884  |
| H | -5.77253 | 2.83288  | -0.87736 | H                        | 0.47569  | -1.12394 | 3.63207  |
| C | -6.17397 | 0.25886  | -0.89685 | H                        | 2.29528  | -1.04404 | 3.98706  |
| H | -6.23295 | 0.10154  | -1.98148 | C                        | -4.51630 | -2.90028 | -0.33352 |
| C | -6.12075 | -1.09938 | -0.18608 | H                        | -5.36573 | -3.58984 | -0.34140 |
| H | -6.33044 | -0.95996 | 0.88111  |                          |          |          |          |
| C | -3.19949 | -3.49977 | -0.32963 | <b>B1'</b>               |          |          |          |
| C | -3.07802 | -4.92547 | -0.33003 | Energy: -1848528.2564962 |          |          |          |
| H | -3.98535 | -5.52292 | -0.34819 | O                        | 2.32567  | 1.52662  | -0.01606 |
| C | -1.85340 | -5.54127 | -0.30398 | O                        | 0.01081  | 2.49332  | -0.15154 |
| H | -1.78183 | -6.62487 | -0.30631 | O                        | -1.97154 | 0.92682  | -0.46468 |
| C | -0.64755 | -4.76898 | -0.27215 | O                        | -1.67336 | -1.57538 | -0.12793 |
| C | -0.73523 | -3.36358 | -0.26956 | O                        | 0.68297  | -2.53759 | -0.12121 |
| C | -2.02584 | -2.70954 | -0.31021 | O                        | 2.65069  | -0.99783 | 0.15745  |





|    |          |          |          |                          |          |          |          |
|----|----------|----------|----------|--------------------------|----------|----------|----------|
| C  | 5.04582  | -1.57628 | -0.95895 | <b>B1'-EO</b>            |          |          |          |
| H  | 6.02007  | -2.01372 | -1.19715 | Energy: -1752012.6512287 |          |          |          |
| C  | 6.09897  | 0.59311  | -1.11432 | O                        | 2.29241  | 1.54352  | -0.21616 |
| H  | 6.11176  | 0.82131  | -2.18776 | O                        | -0.04053 | 2.47198  | -0.28254 |
| C  | 5.89333  | 1.89011  | -0.32014 | O                        | -1.98757 | 0.87238  | -0.63993 |
| H  | 6.13038  | 1.71128  | 0.73520  | O                        | -1.64758 | -1.62203 | -0.30760 |
| C  | 2.69428  | 3.90833  | -0.44344 | O                        | 0.72515  | -2.54327 | -0.32789 |
| C  | 2.39001  | 5.30502  | -0.52902 | O                        | 2.66107  | -0.97354 | -0.04999 |
| H  | 3.21230  | 6.01236  | -0.59167 | O                        | -5.61300 | -0.16342 | 2.06085  |
| C  | 1.09537  | 5.75293  | -0.54197 | N                        | 3.36200  | 4.10264  | -0.30960 |
| H  | 0.88262  | 6.81500  | -0.62157 | N                        | 0.93122  | 5.06417  | -0.29013 |
| C  | -0.00300 | 4.83556  | -0.45776 | N                        | -4.70510 | 0.49164  | -1.06373 |
| C  | 0.26531  | 3.45510  | -0.34350 | N                        | -4.37456 | -2.07380 | -0.62526 |
| C  | 1.63340  | 2.97867  | -0.35997 | N                        | 2.42317  | -4.73121 | -0.32433 |
| C  | -1.35141 | 5.33640  | -0.53373 | N                        | 4.41954  | -3.11034 | 0.14705  |
| H  | -1.46650 | 6.41712  | -0.65373 | C                        | 3.29582  | 5.54992  | -0.57451 |
| C  | -3.75637 | 5.18724  | -0.74738 | H                        | 3.32428  | 5.69678  | -1.66118 |
| H  | -3.92900 | 5.19765  | -1.83084 | C                        | 1.96592  | 6.07467  | -0.02005 |
| C  | -4.79838 | 4.29103  | -0.07082 | H                        | 2.04482  | 6.19921  | 1.06701  |
| H  | -4.82449 | 4.50439  | 1.00508  | C                        | -0.31688 | 5.38459  | -0.45602 |
| C  | -5.23574 | 1.91805  | -0.26105 | H                        | -0.58036 | 6.44572  | -0.46595 |
| H  | -6.29971 | 2.16738  | -0.22641 | C                        | -1.40006 | 4.44685  | -0.62552 |
| C  | -4.90238 | 0.51670  | -0.30427 | C                        | -2.72149 | 4.93555  | -0.87924 |
| C  | -5.96077 | -0.44767 | -0.35291 | H                        | -2.87816 | 6.00826  | -0.94495 |
| H  | -6.98732 | -0.09309 | -0.36400 | C                        | -3.77333 | 4.07046  | -1.04195 |
| C  | -5.69236 | -1.78884 | -0.38836 | H                        | -4.76947 | 4.45613  | -1.23970 |
| H  | -6.50388 | -2.50938 | -0.43259 | C                        | -3.59265 | 2.65423  | -0.95746 |
| C  | -4.34396 | -2.27359 | -0.37418 | C                        | -2.30166 | 2.14104  | -0.70691 |
| C  | -3.27698 | -1.34913 | -0.31233 | C                        | -1.19454 | 3.05387  | -0.52919 |
| C  | -3.56070 | 0.07314  | -0.28399 | C                        | -4.72298 | 1.77828  | -1.19843 |
| C  | -4.11424 | -3.69457 | -0.45961 | H                        | -5.64767 | 2.25778  | -1.53349 |
| H  | -5.00191 | -4.32715 | -0.54489 | C                        | -5.85574 | -0.33924 | -1.45405 |
| C  | 2.62514  | 0.00487  | 2.51763  | H                        | -5.78089 | -0.53955 | -2.53088 |
| C  | 2.99421  | -0.26875 | 3.97765  | C                        | -5.78132 | -1.65541 | -0.66890 |
| H  | 2.33804  | 0.30087  | 4.64296  | H                        | -6.07693 | -1.44823 | 0.36485  |
| H  | 4.03528  | -0.01519 | 4.18468  | C                        | -2.66004 | -3.80474 | -0.55672 |
| H  | 2.83473  | -1.32957 | 4.20025  | C                        | -2.41232 | -5.21192 | -0.63003 |
| Ca | -0.03850 | -0.00195 | 0.25969  | H                        | -3.26036 | -5.88376 | -0.72848 |
| Co | -2.49153 | 2.71880  | -0.30292 | C                        | -1.13851 | -5.71672 | -0.57752 |
| Co | 3.36910  | 0.69425  | -0.41434 | H                        | -0.97093 | -6.78856 | -0.62805 |
| Co | -1.27489 | -3.38682 | -0.33215 | C                        | -0.00626 | -4.84710 | -0.46424 |
| H  | -3.82177 | 6.21681  | -0.38011 | C                        | -0.22036 | -3.45359 | -0.40110 |
| H  | -5.79897 | 4.46664  | -0.47971 | C                        | -1.56654 | -2.92338 | -0.41559 |
| H  | 6.54283  | 2.69040  | -0.69227 | C                        | 1.32113  | -5.41026 | -0.44175 |
| H  | 7.05090  | 0.11685  | -0.85513 | H                        | 1.39388  | -6.49673 | -0.54196 |
| H  | -1.15842 | -7.13174 | -0.46937 | C                        | 3.74355  | -5.37432 | -0.42461 |
| H  | -3.65070 | -6.27766 | -0.29463 | H                        | 4.03623  | -5.39001 | -1.48181 |
| O  | -1.52259 | -0.13498 | 2.39336  | C                        | 4.74387  | -4.52853 | 0.37210  |
| C  | -1.23209 | -0.92418 | 3.57132  | H                        | 4.62876  | -4.73538 | 1.44319  |
| C  | -1.24268 | 0.53978  | 3.64236  | C                        | 5.32239  | -2.18021 | 0.21801  |
| H  | -0.27068 | -1.42746 | 3.53793  | H                        | 6.36183  | -2.47911 | 0.37785  |
| H  | -2.08068 | -1.48949 | 3.94921  | C                        | 5.06646  | -0.76242 | 0.11471  |
| H  | -0.28966 | 1.06027  | 3.66034  | C                        | 6.16842  | 0.15086  | 0.15444  |
| H  | -2.09790 | 1.05498  | 4.07322  | H                        | 7.17303  | -0.24933 | 0.25394  |
| C  | 4.07642  | 3.48250  | -0.44311 | C                        | 5.97038  | 1.50341  | 0.06514  |
| H  | 4.83171  | 4.27363  | -0.47021 | H                        | 6.81714  | 2.18286  | 0.09023  |
|    |          |          |          | C                        | 4.65400  | 2.05136  | -0.06607 |
|    |          |          |          | C                        | 3.54609  | 1.17703  | -0.09691 |

|    |          |          |          |   |          |          |          |
|----|----------|----------|----------|---|----------|----------|----------|
| C  | 3.75570  | -0.25244 | -0.00578 | C | -2.17173 | -2.48978 | -0.51310 |
| C  | 4.49661  | 3.48052  | -0.20102 | C | 0.35560  | -5.33277 | -0.61395 |
| H  | 5.41560  | 4.07219  | -0.23073 | H | 0.28629  | -6.41616 | -0.75126 |
| C  | -4.42379 | -0.00175 | 2.40628  | C | 2.75432  | -5.60536 | -0.56567 |
| Ca | 0.28681  | -0.04303 | -0.15320 | H | 3.04400  | -5.65098 | -1.62324 |
| Co | 2.56193  | -2.84706 | -0.14116 | C | 3.85449  | -4.89903 | 0.23459  |
| Co | -3.22260 | -0.56485 | -0.47739 | H | 3.70055  | -5.07966 | 1.30523  |
| Co | 1.64017  | 3.30320  | -0.27026 | C | 4.71530  | -1.22702 | -0.03884 |
| O  | 0.59456  | 0.28297  | 2.27946  | C | 5.92579  | -0.48202 | 0.11553  |
| C  | -0.46148 | 0.12105  | 3.27243  | H | 6.85773  | -1.02675 | 0.23729  |
| H  | -1.45225 | -0.04502 | 2.84843  | C | 5.92531  | 0.88909  | 0.12808  |
| H  | -0.16956 | -0.49891 | 4.11667  | H | 6.85318  | 1.43941  | 0.25134  |
| C  | 0.19659  | 1.41892  | 3.08380  | C | 4.70072  | 1.61842  | 0.00405  |
| H  | 0.95521  | 1.74685  | 3.79013  | C | 3.49527  | 0.91121  | -0.16894 |
| H  | -0.31387 | 2.20411  | 2.53186  | C | 3.49656  | -0.53322 | -0.22323 |
| H  | 1.70983  | 7.04469  | -0.45865 | C | 4.71520  | 3.05752  | 0.05563  |
| H  | 4.14588  | 6.08086  | -0.13383 | H | 5.69422  | 3.54070  | 0.10495  |
| H  | -6.80447 | 0.17546  | -1.26781 | C | 3.77109  | 5.28116  | -0.00224 |
| H  | -6.42367 | -2.42347 | -1.11442 | H | 3.77273  | 5.58918  | -1.05461 |
| H  | 3.71999  | -6.40634 | -0.05985 | C | 2.54698  | 5.86788  | 0.70437  |
| H  | 5.77544  | -4.75875 | 0.08614  | H | 2.68755  | 5.82258  | 1.79080  |
| C  | -4.14265 | 0.48564  | 3.83856  | C | 0.17504  | 5.52059  | 0.38258  |
| H  | -3.49922 | 1.37128  | 3.82204  | H | 0.05647  | 6.58765  | 0.58840  |
| H  | -5.07174 | 0.72131  | 4.36181  | C | -1.02895 | 4.76682  | 0.18348  |
| H  | -3.60837 | -0.29057 | 4.39801  | C | -2.29587 | 5.43632  | 0.20423  |
| O  | -3.37881 | -0.21073 | 1.69207  | H | -2.31534 | 6.51309  | 0.34257  |
| C  | -4.02311 | -3.31944 | -0.65091 | C | -3.46091 | 4.73529  | 0.04785  |
| H  | -4.80340 | -4.07886 | -0.75888 | H | -4.41469 | 5.25491  | 0.05268  |

## B2

Energy: -1848536.2128708

|   |          |          |          |    |          |          |          |
|---|----------|----------|----------|----|----------|----------|----------|
| O | -2.08220 | 1.32706  | -0.25259 | C  | -0.99260 | 3.36626  | 0.00295  |
| O | -2.07164 | -1.18994 | -0.38540 | C  | -4.71912 | 2.63167  | -0.32966 |
| O | 0.14676  | -2.41279 | -0.70529 | H  | -5.60526 | 3.26628  | -0.42143 |
| O | 2.33176  | -1.08560 | -0.42436 | C  | 0.90526  | -1.86131 | 2.55760  |
| O | 2.30336  | 1.46923  | -0.27581 | C  | 0.78923  | -2.02467 | 4.07387  |
| O | 0.10075  | 2.64483  | -0.05558 | H  | 1.28438  | -1.18554 | 4.57341  |
| O | 0.41515  | -0.79342 | 2.06865  | H  | 1.23322  | -2.96143 | 4.41426  |
| O | 1.47263  | -2.78910 | 1.91583  | H  | -0.26539 | -1.99492 | 4.36696  |
| N | -4.86267 | 1.34880  | -0.43981 | Ca | 0.12089  | 0.04018  | -0.15657 |
| N | -4.84190 | -1.27171 | -0.38325 | Co | 1.86527  | 3.24180  | 0.00036  |
| N | 1.52760  | -4.80155 | -0.45591 | Co | 1.91277  | -2.93412 | -0.25760 |
| N | 3.73085  | -3.45315 | 0.00389  | Co | -3.47991 | 0.05048  | -0.27801 |
| N | 3.65722  | 3.81409  | 0.04136  | O  | 0.08124  | 0.35432  | -2.65257 |
| N | 1.38466  | 5.03254  | 0.35683  | C  | 1.20384  | 0.75100  | -3.47696 |
| C | -6.15610 | 0.73614  | -0.78233 | H  | 1.36291  | 0.11856  | -4.34640 |
| H | -6.22955 | 0.68667  | -1.87587 | H  | 2.09051  | 1.03635  | -2.91783 |
| C | -6.17808 | -0.68391 | -0.20260 | C  | 0.00356  | 1.59108  | -3.40009 |
| H | -6.38269 | -0.63523 | 0.87378  | H  | 0.01727  | 2.48848  | -2.78750 |
| C | -4.66448 | -2.55496 | -0.47386 | H  | -0.71719 | 1.57450  | -4.21356 |
| H | -5.54783 | -3.19983 | -0.49264 | H  | 4.70150  | 5.62709  | 0.45949  |
| C | -3.38234 | -3.21646 | -0.54127 | H  | 2.39058  | 6.91405  | 0.42142  |
| C | -3.33038 | -4.64663 | -0.61269 | H  | 4.84676  | -5.27429 | -0.03941 |
| H | -4.26367 | -5.20200 | -0.63264 | H  | 2.60220  | -6.62990 | -0.20893 |
| C | -2.13075 | -5.30929 | -0.63272 | H  | -6.95803 | -1.29085 | -0.67471 |
| H | -2.10727 | -6.39511 | -0.65727 | H  | -6.99837 | 1.32850  | -0.40907 |
| C | -0.88863 | -4.59711 | -0.61567 | O  | -3.73191 | 0.10824  | 2.05897  |
| C | -0.90452 | -3.18521 | -0.62098 | C  | -3.64862 | -1.06251 | 2.90260  |
|   |          |          |          | C  | -2.69836 | 0.04245  | 3.07452  |

|   |          |          |         |   |          |         |          |
|---|----------|----------|---------|---|----------|---------|----------|
| H | -3.32653 | -1.96677 | 2.39219 | H | -2.23916 | 6.26427 | 0.10736  |
| H | -4.47958 | -1.17696 | 3.59494 | C | -2.62025 | 4.15045 | -0.16878 |
| H | -1.68232 | -0.06862 | 2.70230 | C | -4.03688 | 4.33931 | -0.22077 |
| H | -2.84358 | 0.74460  | 3.89270 | H | -4.43284 | 5.34889 | -0.16765 |
| C | 4.76283  | -2.67064 | 0.04321 | C | -4.88295 | 3.26764 | -0.34091 |
| H | 5.75159  | -3.11753 | 0.18315 | H | -5.95666 | 3.42412 | -0.38929 |

### B2-EO

Energy: -1752021.6122334

|   |          |          |          |
|---|----------|----------|----------|
| O | -2.39946 | 0.54145  | -0.38139 |
| O | -1.50702 | -1.81336 | -0.50298 |
| O | 0.99900  | -2.18651 | -0.82578 |
| O | 2.57235  | -0.18698 | -0.51654 |
| O | 1.65585  | 2.18993  | -0.39619 |
| O | -0.81342 | 2.54411  | -0.20566 |
| O | 0.66134  | -0.65600 | 1.96016  |
| O | 2.39006  | -2.10705 | 1.79668  |
| N | -5.01012 | -0.41673 | -0.59993 |
| N | -4.07206 | -2.86228 | -0.49038 |
| N | 3.13123  | -3.94181 | -0.57464 |
| N | 4.72291  | -1.90422 | -0.13318 |
| N | 2.10137  | 4.88089  | -0.26703 |
| N | -0.45604 | 5.24608  | 0.00205  |
| C | -6.00779 | -1.45375 | -0.91371 |
| H | -6.06464 | -1.55125 | -2.00496 |
| C | -5.52777 | -2.77584 | -0.30334 |
| H | -5.72623 | -2.77333 | 0.77489  |
| C | -3.45628 | -4.00277 | -0.55410 |
| H | -4.05754 | -4.91651 | -0.55125 |
| C | -2.02366 | -4.17359 | -0.62016 |
| C | -1.47512 | -5.49539 | -0.67440 |
| H | -2.15476 | -6.34273 | -0.67715 |
| C | -0.11933 | -5.69663 | -0.70058 |
| H | 0.28274  | -6.70574 | -0.71426 |
| C | 0.79400  | -4.59457 | -0.70497 |
| C | 0.28406  | -3.27756 | -0.72233 |
| C | -1.14491 | -3.06858 | -0.61056 |
| C | 2.21722  | -4.85016 | -0.71260 |
| H | 2.52916  | -5.89141 | -0.83819 |
| C | 4.56105  | -4.26586 | -0.68845 |
| H | 4.84345  | -4.21476 | -1.74769 |
| C | 5.34821  | -3.21296 | 0.10117  |
| H | 5.27394  | -3.43032 | 1.17341  |
| C | 4.86283  | 0.52502  | -0.21538 |
| C | 5.73884  | 1.65512  | -0.12147 |
| H | 6.80599  | 1.47641  | -0.02465 |
| C | 5.25749  | 2.93673  | -0.14359 |
| H | 5.93653  | 3.78125  | -0.07480 |
| C | 3.84920  | 3.18917  | -0.23795 |
| C | 2.96152  | 2.09551  | -0.33469 |
| C | 3.47571  | 0.74094  | -0.36451 |
| C | 3.36043  | 4.53686  | -0.24942 |
| H | 4.10913  | 5.33350  | -0.25297 |
| C | 1.69970  | 6.29114  | -0.39652 |
| H | 1.60907  | 6.52493  | -1.46400 |
| C | 0.34037  | 6.45203  | 0.28739  |
| H | 0.47854  | 6.51511  | 1.37317  |
| C | -1.75534 | 5.29228  | -0.01672 |

|    |          |          |          |
|----|----------|----------|----------|
| C  | -2.98782 | 1.71059  | -0.34134 |
| C  | -2.09685 | 2.84354  | -0.23556 |
| C  | -5.32254 | 0.84043  | -0.57246 |
| H  | -6.37141 | 1.11969  | -0.70720 |
| C  | 1.51382  | -1.46821 | 2.44314  |
| C  | 1.45357  | -1.69394 | 3.95468  |
| H  | 1.45929  | -0.73226 | 4.47673  |
| H  | 2.28608  | -2.30667 | 4.30420  |
| H  | 0.51258  | -2.19328 | 4.21056  |
| Ca | 0.11436  | 0.10432  | -0.23259 |
| Co | 0.61751  | 3.71646  | -0.21096 |
| Co | 2.83695  | -2.06011 | -0.37607 |
| Co | -3.26081 | -1.14597 | -0.40193 |
| H  | 2.44445  | 6.96451  | 0.04013  |
| H  | -0.17106 | 7.35972  | -0.04850 |
| H  | 6.40720  | -3.21722 | -0.17991 |
| H  | 4.77829  | -5.27637 | -0.32556 |
| H  | -6.04856 | -3.62945 | -0.75041 |
| H  | -7.00197 | -1.18400 | -0.54198 |
| O  | -3.53841 | -1.24628 | 1.93221  |
| C  | -2.54323 | -1.18992 | 2.98552  |
| C  | -3.54413 | -0.12597 | 2.84458  |
| H  | -1.52027 | -1.01581 | 2.65675  |
| H  | -2.68044 | -1.94509 | 3.75672  |
| H  | -3.25522 | 0.82315  | 2.40056  |
| H  | -4.40181 | -0.09551 | 3.51277  |
| C  | 5.41529  | -0.80841 | -0.11860 |
| H  | 6.49989  | -0.87876 | 0.00563  |

### C1-EO

Energy: -1752015.9396356

|   |          |          |          |
|---|----------|----------|----------|
| O | 0.24922  | 2.52441  | -0.28435 |
| O | 2.47892  | 1.41316  | -0.02417 |
| O | 2.64289  | -1.14992 | 0.08966  |
| O | 0.58268  | -2.54321 | -0.26253 |
| O | -1.72826 | -1.43454 | -0.32871 |
| O | -1.84673 | 1.08006  | -0.57482 |
| O | -4.16003 | -0.04981 | 1.59515  |
| O | -3.40788 | 0.56922  | 3.64259  |
| N | 1.41178  | 4.99469  | -0.26412 |
| N | 3.73863  | 3.84974  | -0.18683 |
| N | 4.20278  | -3.39167 | 0.16926  |
| N | 2.11597  | -4.81388 | -0.42156 |
| N | -4.42866 | -1.66424 | -0.93757 |
| N | -4.53163 | 0.91862  | -1.30442 |
| C | 2.50956  | 5.92823  | 0.03613  |
| H | 2.55445  | 6.05676  | 1.12393  |
| C | 3.80987  | 5.29547  | -0.46247 |
| H | 3.89964  | 5.43330  | -1.54656 |
| C | 4.82499  | 3.14012  | -0.06307 |
| H | 5.78514  | 3.66183  | -0.09083 |



|    |          |          |          |   |          |          |          |
|----|----------|----------|----------|---|----------|----------|----------|
| H  | -0.34158 | 6.49243  | -0.65854 | C | -5.04337 | -0.40507 | -0.29073 |
| C  | -1.29417 | 4.54759  | -0.69517 | C | -6.13890 | 0.50192  | -0.12392 |
| C  | -2.58986 | 5.11060  | -0.92727 | H | -7.15007 | 0.10631  | -0.14640 |
| H  | -2.67811 | 6.18612  | -1.04954 | C | -5.92635 | 1.84314  | 0.05350  |
| C  | -3.70078 | 4.31077  | -1.00272 | H | -6.76734 | 2.51950  | 0.17462  |
| H  | -4.67595 | 4.75029  | -1.19294 | C | -4.60053 | 2.38347  | 0.07788  |
| C  | -3.61239 | 2.89285  | -0.83358 | C | -3.49914 | 1.51246  | -0.06359 |
| C  | -2.35135 | 2.30903  | -0.58268 | C | -3.72353 | 0.09543  | -0.25701 |
| C  | -1.17568 | 3.15064  | -0.53096 | C | -4.42078 | 3.80369  | 0.25705  |
| C  | -4.80916 | 2.08986  | -0.99037 | H | -5.32419 | 4.39493  | 0.42901  |
| H  | -5.71415 | 2.62561  | -1.29337 | C | -3.16870 | 5.85771  | 0.52906  |
| C  | 0.10916  | 0.34688  | 3.54373  | H | -3.00471 | 5.97053  | 1.60778  |
| C  | 1.13227  | 0.08991  | 4.61785  | C | -1.95795 | 6.40289  | -0.23541 |
| H  | 0.69927  | 0.16919  | 5.61427  | H | -2.22640 | 6.55675  | -1.28794 |
| H  | 1.94794  | 0.81057  | 4.50935  | C | 1.45955  | 4.78527  | -0.38716 |
| H  | 1.55544  | -0.90825 | 4.47438  | C | 2.78610  | 5.29585  | -0.55751 |
| Ca | 0.11617  | -0.03025 | -0.04379 | H | 2.93063  | 6.37164  | -0.59013 |
| Co | 1.67584  | 3.22255  | -0.38659 | C | 3.85427  | 4.44971  | -0.69248 |
| Co | 2.22554  | -2.96028 | -0.27576 | H | 4.85396  | 4.84931  | -0.83613 |
| Co | -3.43712 | -0.34087 | -0.27721 | C | 3.68244  | 3.02950  | -0.65660 |
| H  | 4.35566  | 5.83524  | -0.43677 | C | 2.39222  | 2.49270  | -0.44976 |
| H  | 1.97429  | 6.94468  | -0.71980 | C | 1.25882  | 3.38810  | -0.33739 |
| H  | 5.32340  | -5.04546 | -0.37255 | C | 4.83696  | 2.18097  | -0.84389 |
| H  | 3.16376  | -6.56667 | -0.49015 | H | 5.80469  | 2.68274  | -0.93222 |
| H  | -6.76576 | -1.99423 | -0.77859 | C | 6.02584  | 0.08070  | -1.02669 |
| H  | -6.99684 | 0.62270  | -0.86108 | H | 6.30925  | -0.22108 | -0.01265 |
| O  | -3.90144 | -0.14759 | 1.77034  | C | 5.69077  | -1.16504 | -1.85447 |
| C  | -2.92079 | -0.40919 | 2.69138  | H | 5.66084  | -0.90243 | -2.91940 |
| C  | -2.18692 | 0.88936  | 3.08518  | C | 3.97827  | -2.85554 | -1.64146 |
| H  | -2.14335 | -1.12016 | 2.33497  | H | 4.71441  | -3.56932 | -2.02199 |
| H  | -3.31410 | -0.85426 | 3.63340  | C | 2.64442  | -3.36554 | -1.42135 |
| H  | -1.79359 | 1.38659  | 2.19918  | C | 2.38457  | -4.75161 | -1.66858 |
| H  | -2.85018 | 1.56894  | 3.62370  | H | 3.21245  | -5.39232 | -1.95793 |
| C  | 5.03409  | -2.47472 | -0.11230 | C | 1.12174  | -5.26783 | -1.54987 |
| H  | 6.05769  | -2.84995 | -0.03961 | H | 0.94037  | -6.32240 | -1.73562 |
|    |          |          |          | C | 0.01519  | -4.43263 | -1.19311 |
|    |          |          |          | C | 0.23915  | -3.06094 | -0.94005 |
|    |          |          |          | C | 1.58033  | -2.52154 | -1.03457 |

## D1-EO

Energy: -1870358.5633142

|   |          |          |          |    |          |          |          |
|---|----------|----------|----------|----|----------|----------|----------|
| O | -0.68417 | -2.18724 | -0.61997 | C  | -1.29831 | -5.01800 | -1.07681 |
| O | -2.63408 | -0.61697 | -0.40471 | H  | -1.36427 | -6.10336 | -1.19314 |
| O | -2.23810 | 1.87114  | -0.04859 | C  | 4.19364  | -1.03679 | 2.70459  |
| O | 0.09654  | 2.79380  | -0.20775 | C  | 5.47842  | -0.97000 | 3.49406  |
| O | 2.10204  | 1.21744  | -0.36542 | H  | 5.45728  | -1.65234 | 4.34480  |
| O | 1.68147  | -1.24352 | -0.76266 | H  | 5.60395  | 0.04924  | 3.87551  |
| O | 4.12402  | -0.76931 | 1.51039  | H  | 6.32318  | -1.19666 | 2.84225  |
| O | 3.16159  | -1.40060 | 3.46532  | Ca | -0.24745 | 0.26639  | 0.06143  |
| N | -2.39007 | -4.35839 | -0.83522 | Co | 3.26098  | -0.21274 | -0.78948 |
| N | -4.41997 | -2.72229 | -0.70425 | Co | -1.57745 | 3.62554  | -0.04448 |
| N | -3.27844 | 4.42013  | 0.23441  | Co | -2.53752 | -2.47703 | -0.63540 |
| N | -0.89096 | 5.38912  | -0.17918 | O  | -0.07448 | -0.06397 | 2.32819  |
| N | 4.80417  | 0.88810  | -0.91922 | C  | 1.10152  | -0.06868 | 3.03646  |
| N | 4.34961  | -1.62725 | -1.45840 | H  | 0.96501  | 0.08982  | 4.13005  |
| C | -3.67602 | -5.03486 | -0.60767 | H  | 1.82645  | 0.71972  | 2.72343  |
| H | -3.77696 | -5.20762 | 0.47041  | C  | 1.83182  | -1.41483 | 2.86017  |
| C | -4.79080 | -4.09666 | -1.08261 | H  | 1.92780  | -1.64649 | 1.79895  |
| H | -4.86614 | -4.13937 | -2.17626 | H  | 1.30050  | -2.22286 | 3.36761  |
| C | -5.31815 | -1.80113 | -0.53091 | H  | 6.85115  | 0.64568  | -1.47311 |
| H | -6.37153 | -2.08831 | -0.58887 | H  | 6.44470  | -1.94723 | -1.71656 |

|   |          |          |          |   |          |         |          |
|---|----------|----------|----------|---|----------|---------|----------|
| H | -1.62703 | 7.36098  | 0.17860  | C | 0.15881  | 6.39247 | -0.21216 |
| H | -4.08325 | 6.39721  | 0.26172  | H | 0.06695  | 6.53307 | 0.87131  |
| H | -5.75896 | -4.38507 | -0.66056 | C | -1.70310 | 4.99525 | -0.85718 |
| H | -3.72375 | -6.00133 | -1.11996 | H | -2.28858 | 5.91541 | -0.92780 |
| C | 0.35960  | 5.71437  | -0.30808 | C | -2.40297 | 3.75921 | -1.09055 |
| H | 0.61127  | 6.77579  | -0.38260 | C | -3.78177 | 3.78111 | -1.46800 |
| O | -0.75702 | -4.10531 | 3.57403  | H | -4.27551 | 4.73948 | -1.59702 |
| C | -1.78490 | -3.77566 | 3.12595  | C | -4.46945 | 2.61076 | -1.66993 |
| O | -2.81732 | -3.45352 | 2.67885  | H | -5.51363 | 2.63935 | -1.96838 |

## D2-EO

Energy: -1870342.4605741

|   |          |          |          |    |          |          |          |
|---|----------|----------|----------|----|----------|----------|----------|
| O | -1.79938 | 0.19458  | -0.89346 | C  | -4.60757 | 0.13482  | -1.77077 |
| O | -0.62826 | -2.05077 | -0.65207 | H  | -5.61160 | 0.28160  | -2.17978 |
| O | 1.90847  | -2.13441 | -0.41106 | C  | -6.74247 | 0.29501  | 2.48590  |
| O | 3.15951  | -0.02228 | 0.05913  | C  | -7.41953 | 1.29544  | 3.39445  |
| O | 1.97774  | 2.24980  | -0.19445 | H  | -6.68372 | 1.99957  | 3.79318  |
| O | -0.48963 | 2.36741  | -0.58705 | H  | -7.87253 | 0.77945  | 4.24630  |
| O | -7.04760 | 0.10179  | 1.32223  | H  | -8.18740 | 1.83548  | 2.84116  |
| O | -5.76864 | -0.36234 | 3.13778  | Ca | 0.61184  | 0.07063  | -0.33269 |
| N | -4.17371 | -1.07339 | -1.60380 | Co | 0.78899  | 3.67805  | -0.39212 |
| N | -3.00793 | -3.38767 | -1.19620 | Co | 3.69092  | -1.79550 | -0.03072 |
| N | 4.21656  | -3.59369 | -0.25947 | Co | -2.47198 | -1.58984 | -0.89404 |
| N | 5.47797  | -1.42981 | 0.42465  | H  | 2.20952  | 7.11833  | -0.08003 |
| N | 2.13982  | 4.99495  | -0.28829 | H  | -0.35762 | 7.21847  | -0.71141 |
| N | -0.44200 | 5.09227  | -0.55320 | H  | 7.31564  | -2.51101 | 0.50808  |
| C | -4.96201 | -2.23160 | -2.05652 | H  | 5.96187  | -4.75254 | 0.14528  |
| H | -4.79112 | -2.36228 | -3.13269 | H  | -4.79237 | -4.39415 | -1.80086 |
| C | -4.46708 | -3.47311 | -1.30348 | H  | -6.03509 | -2.07724 | -1.89918 |
| H | -4.86438 | -3.45979 | -0.28303 | O  | -3.00514 | -1.72796 | 1.12916  |
| C | -2.25472 | -4.43948 | -1.21509 | C  | -3.73385 | -0.74725 | 1.75605  |
| H | -2.71964 | -5.41492 | -1.38751 | C  | -4.99814 | -1.35055 | 2.39326  |
| C | -0.81783 | -4.43452 | -1.02101 | H  | -4.07614 | 0.06587  | 1.08228  |
| C | -0.10132 | -5.67185 | -1.09453 | H  | -3.17980 | -0.22923 | 2.57609  |
| H | -0.66168 | -6.58275 | -1.28570 | H  | -5.63363 | -1.79469 | 1.62466  |
| C | 1.25698  | -5.72642 | -0.92597 | H  | -4.72809 | -2.11125 | 3.13053  |
| H | 1.78213  | -6.67525 | -0.97983 | C  | 6.01633  | -0.25726 | 0.57763  |
| C | 2.01065  | -4.53325 | -0.67691 | H  | 7.07427  | -0.20387 | 0.84542  |
| C | 1.33188  | -3.29695 | -0.61053 | C  | 1.33559  | -0.96389 | 4.19185  |
| C | -0.10628 | -3.24224 | -0.76489 | O  | 1.15802  | -1.65303 | 5.11789  |
| C | 3.43296  | -4.60501 | -0.52081 | O  | 1.51713  | -0.27226 | 3.26466  |
| H | 3.89147  | -5.59043 | -0.63828 |    |          |          |          |
| C | 5.67955  | -3.75951 | -0.21936 |    |          |          |          |
| H | 6.06906  | -3.64301 | -1.23768 |    |          |          |          |
| C | 6.24530  | -2.66028 | 0.68211  |    |          |          |          |
| H | 6.10049  | -2.93385 | 1.73382  |    |          |          |          |
| C | 5.31969  | 0.99614  | 0.42821  |    |          |          |          |
| C | 6.04880  | 2.22218  | 0.54339  |    |          |          |          |
| H | 7.11600  | 2.17814  | 0.73826  |    |          |          |          |
| C | 5.42086  | 3.42995  | 0.40043  |    |          |          |          |
| H | 5.98517  | 4.35431  | 0.47919  |    |          |          |          |
| C | 4.01545  | 3.50404  | 0.14010  |    |          |          |          |
| C | 3.26515  | 2.30947  | 0.04012  |    |          |          |          |
| C | 3.93333  | 1.03624  | 0.18207  |    |          |          |          |
| C | 3.40521  | 4.78853  | -0.05624 |    |          |          |          |
| H | 4.07062  | 5.65495  | -0.02330 |    |          |          |          |
| C | 1.63732  | 6.34422  | -0.60183 |    |          |          |          |
| H | 1.74425  | 6.50538  | -1.68103 |    |          |          |          |

## E1-EO

Energy: -1870377.5219692

|   |          |          |          |
|---|----------|----------|----------|
| O | -0.45404 | -2.32976 | -0.84289 |
| O | -2.59407 | -0.91118 | -0.83288 |
| O | -2.37308 | 1.60671  | -0.44572 |
| O | -0.10915 | 2.68817  | -0.44846 |
| O | 1.99993  | 1.25583  | -0.52118 |
| O | 1.82016  | -1.20992 | -0.99979 |
| O | 3.88923  | -0.42738 | 1.60779  |
| O | 2.87004  | -0.78605 | 3.59639  |
| N | -1.91532 | -4.62210 | -0.32132 |
| N | -4.11462 | -3.19963 | -0.40988 |
| N | -3.58203 | 4.04141  | 0.09821  |
| N | -1.26979 | 5.20081  | -0.25255 |
| N | 4.77411  | 1.13086  | -0.80422 |
| N | 4.55943  | -1.43626 | -1.27981 |

|    |          |          |          |   |          |          |          |
|----|----------|----------|----------|---|----------|----------|----------|
| C  | -3.12348 | -5.36254 | 0.06898  | H | 1.14868  | 0.57175  | 2.11242  |
| H  | -3.19413 | -5.33346 | 1.16278  | C | 1.71175  | -1.34332 | 2.93150  |
| C  | -4.33585 | -4.64710 | -0.53948 | H | 2.01444  | -1.81085 | 1.99339  |
| H  | -4.40549 | -4.89012 | -1.60735 | H | 1.30810  | -2.08781 | 3.61585  |
| C  | -5.09950 | -2.36249 | -0.33952 | H | 6.86805  | 1.02952  | -1.21040 |
| H  | -6.12002 | -2.75493 | -0.30680 | H | 6.68637  | -1.59221 | -1.38631 |
| C  | -4.95299 | -0.92410 | -0.28477 | H | -2.15120 | 7.09857  | 0.17450  |
| C  | -6.10180 | -0.11794 | -0.01057 | H | -4.52843 | 5.95317  | 0.19737  |
| H  | -7.06147 | -0.60874 | 0.12384  | H | -5.26669 | -4.96120 | -0.05513 |
| C  | -6.00370 | 1.24447  | 0.10081  | H | -3.08167 | -6.41042 | -0.24760 |
| H  | -6.88379 | 1.84281  | 0.31719  | C | -0.04116 | 5.61809  | -0.29713 |
| C  | -4.74058 | 1.90283  | -0.03920 | H | 0.13951  | 6.69619  | -0.28214 |
| C  | -3.59331 | 1.13208  | -0.32736 | O | -1.20607 | -1.74451 | 3.71417  |
| C  | -3.70362 | -0.30028 | -0.49717 | C | -1.31377 | -1.65307 | 2.49060  |
| C  | -4.66603 | 3.32832  | 0.16407  | O | -2.10540 | -2.19407 | 1.68809  |
| H  | -5.60218 | 3.83602  | 0.41146  |   |          |          |          |
| C  | -3.57877 | 5.47106  | 0.45145  |   |          |          |          |
| H  | -3.43067 | 5.55275  | 1.53536  |   |          |          |          |
| C  | -2.40702 | 6.13529  | -0.27866 |   |          |          |          |
| H  | -2.67762 | 6.30894  | -1.32750 |   |          |          |          |
| C  | 1.12381  | 4.77009  | -0.37813 |   |          |          |          |
| C  | 2.42140  | 5.37237  | -0.41303 |   |          |          |          |
| H  | 2.49581  | 6.45470  | -0.36417 |   |          |          |          |
| C  | 3.55204  | 4.60530  | -0.51496 |   |          |          |          |
| H  | 4.53025  | 5.07587  | -0.55122 |   |          |          |          |
| C  | 3.47673  | 3.17756  | -0.57469 |   |          |          |          |
| C  | 2.21221  | 2.55165  | -0.51226 |   |          |          |          |
| C  | 1.01687  | 3.36362  | -0.44251 |   |          |          |          |
| C  | 4.70343  | 2.41905  | -0.68828 |   |          |          |          |
| H  | 5.63431  | 2.99263  | -0.66975 |   |          |          |          |
| C  | 6.05876  | 0.41556  | -0.80124 |   |          |          |          |
| H  | 6.29580  | 0.16894  | 0.23959  |   |          |          |          |
| C  | 5.88264  | -0.88059 | -1.60312 |   |          |          |          |
| H  | 5.90495  | -0.65513 | -2.67657 |   |          |          |          |
| C  | 4.31511  | -2.70904 | -1.32817 |   |          |          |          |
| H  | 5.14227  | -3.38964 | -1.54840 |   |          |          |          |
| C  | 3.01533  | -3.31125 | -1.13022 |   |          |          |          |
| C  | 2.89186  | -4.73718 | -1.08989 |   |          |          |          |
| H  | 3.78859  | -5.34156 | -1.19151 |   |          |          |          |
| C  | 1.67199  | -5.33655 | -0.90443 |   |          |          |          |
| H  | 1.59928  | -6.41882 | -0.84604 |   |          |          |          |
| C  | 0.47574  | -4.56090 | -0.77734 |   |          |          |          |
| C  | 0.55897  | -3.15581 | -0.87643 |   |          |          |          |
| C  | 1.85254  | -2.52288 | -1.00770 |   |          |          |          |
| C  | -0.78107 | -5.22325 | -0.50801 |   |          |          |          |
| H  | -0.75118 | -6.31379 | -0.42900 |   |          |          |          |
| C  | 3.88998  | -0.37357 | 2.82810  |   |          |          |          |
| C  | 5.04657  | 0.11784  | 3.65843  |   |          |          |          |
| H  | 5.65929  | -0.74120 | 3.95254  |   |          |          |          |
| H  | 4.69538  | 0.60730  | 4.56822  |   |          |          |          |
| H  | 5.66049  | 0.79875  | 3.06884  |   |          |          |          |
| Ca | -0.30750 | 0.11762  | -0.53855 |   |          |          |          |
| Co | 3.30616  | -0.07277 | -0.83566 |   |          |          |          |
| Co | -1.83875 | 3.39193  | -0.26877 |   |          |          |          |
| Co | -2.25841 | -2.75134 | -0.47951 |   |          |          |          |
| O  | -0.36701 | -0.75283 | 1.82959  |   |          |          |          |
| C  | 0.68065  | -0.24655 | 2.66783  |   |          |          |          |
| H  | 0.26899  | 0.13257  | 3.60488  |   |          |          |          |

## E2-EO

Energy: -1870380.6057640

|   |          |          |          |
|---|----------|----------|----------|
| O | 0.43310  | 2.51496  | -0.36505 |
| O | 2.63930  | 1.31495  | -0.22717 |
| O | 2.69863  | -1.22605 | -0.03637 |
| O | 0.58855  | -2.54659 | -0.36608 |
| O | -1.63592 | -1.34181 | -0.70160 |
| O | -1.66076 | 1.16742  | -0.89248 |
| O | -5.23630 | 0.10434  | 1.57018  |
| O | -4.37905 | 0.35257  | 3.65041  |
| N | 1.70724  | 4.97189  | -0.25802 |
| N | 4.00294  | 3.73403  | -0.17714 |
| N | 4.18900  | -3.55416 | 0.14564  |
| N | 2.04115  | -4.91386 | -0.44620 |
| N | -4.30952 | -1.46754 | -1.42859 |
| N | -4.29426 | 1.11939  | -1.77629 |
| C | 2.83066  | 5.84342  | 0.11708  |
| H | 2.85671  | 5.91057  | 1.21154  |
| C | 4.12053  | 5.18676  | -0.38834 |
| H | 4.22694  | 5.36784  | -1.46508 |
| C | 5.05143  | 2.97944  | -0.04693 |
| H | 6.03386  | 3.45855  | -0.01993 |
| C | 5.03368  | 1.54061  | 0.04971  |
| C | 6.27187  | 0.84062  | 0.21638  |
| H | 7.18930  | 1.41734  | 0.28817  |
| C | 6.30806  | -0.52627 | 0.28058  |
| H | 7.25424  | -1.04490 | 0.40311  |
| C | 5.10729  | -1.30130 | 0.18879  |
| C | 3.86862  | -0.64020 | 0.04136  |
| C | 3.83165  | 0.80508  | -0.04698 |
| C | 5.19233  | -2.73890 | 0.26539  |
| H | 6.18419  | -3.16261 | 0.44427  |
| C | 4.34004  | -5.00413 | 0.34443  |
| H | 4.16374  | -5.22045 | 1.40528  |
| C | 3.27999  | -5.70888 | -0.50809 |
| H | 3.61021  | -5.73957 | -1.55378 |
| C | -0.36511 | -4.73364 | -0.77550 |
| C | -1.56073 | -5.46192 | -1.07458 |
| H | -1.50330 | -6.54257 | -1.16505 |
| C | -2.75361 | -4.81490 | -1.25850 |
| H | -3.65166 | -5.37838 | -1.49396 |
| C | -2.84351 | -3.39011 | -1.15988 |

|    |          |          |          |    |          |          |          |
|----|----------|----------|----------|----|----------|----------|----------|
| C  | -1.68871 | -2.64540 | -0.83444 | N  | -4.59256 | -0.62437 | -1.26075 |
| C  | -0.42777 | -3.32932 | -0.64038 | N  | -4.34050 | 1.95997  | -1.28071 |
| C  | -4.11634 | -2.74936 | -1.39478 | N  | 2.14863  | 4.94359  | 0.17110  |
| H  | -4.97468 | -3.40747 | -1.55525 | N  | 4.30993  | 3.48894  | 0.01455  |
| C  | -5.65282 | -0.88499 | -1.57472 | N  | 3.56521  | -3.75339 | 0.02077  |
| H  | -6.04664 | -0.71322 | -0.56742 | N  | 1.29919  | -4.85081 | -0.70403 |
| C  | -5.50213 | 0.45768  | -2.29806 | C  | -5.87005 | 0.08988  | -1.09263 |
| H  | -5.35864 | 0.28706  | -3.37229 | H  | -6.08109 | 0.13701  | -0.01870 |
| C  | -4.16743 | 2.41048  | -1.78906 | C  | -5.68892 | 1.49989  | -1.65577 |
| H  | -5.01342 | 3.01087  | -2.13443 | H  | -5.74459 | 1.47502  | -2.75052 |
| C  | -2.97812 | 3.13395  | -1.40725 | C  | -4.08764 | 3.22226  | -1.10652 |
| C  | -2.98073 | 4.56368  | -1.48116 | H  | -4.91407 | 3.93194  | -1.19256 |
| H  | -3.89449 | 5.06725  | -1.78268 | C  | -2.78774 | 3.77155  | -0.81179 |
| C  | -1.85665 | 5.28914  | -1.18712 | C  | -2.65223 | 5.17772  | -0.59217 |
| H  | -1.87210 | 6.37328  | -1.24919 | H  | -3.53772 | 5.80366  | -0.64710 |
| C  | -0.63912 | 4.64042  | -0.80582 | C  | -1.42940 | 5.72942  | -0.31259 |
| C  | -0.60999 | 3.23245  | -0.70703 | H  | -1.33843 | 6.79833  | -0.14361 |
| C  | -1.80040 | 2.46634  | -1.00670 | C  | -0.25285 | 4.92085  | -0.23234 |
| C  | 0.52635  | 5.44252  | -0.51764 | C  | -0.35681 | 3.52712  | -0.44537 |
| H  | 0.38835  | 6.52702  | -0.51902 | C  | -1.64537 | 2.94915  | -0.74705 |
| C  | -5.37171 | 0.07782  | 2.78085  | C  | 1.00395  | 5.54990  | 0.10033  |
| C  | -6.65143 | -0.25172 | 3.50566  | H  | 0.96971  | 6.61998  | 0.32122  |
| H  | -6.49072 | -1.09656 | 4.18124  | C  | 3.36398  | 5.63572  | 0.63217  |
| H  | -7.43159 | -0.49451 | 2.78519  | H  | 3.41446  | 5.54101  | 1.72377  |
| H  | -6.96213 | 0.60091  | 4.11641  | C  | 4.57325  | 4.93559  | 0.00067  |
| Ca | 0.43267  | -0.00584 | 0.09706  | H  | 4.67888  | 5.25394  | -1.04371 |
| Co | -2.98732 | -0.12800 | -1.18813 | C  | 5.08421  | 1.18375  | 0.08331  |
| Co | 2.38127  | -3.06702 | -0.16659 | C  | 6.19889  | 0.32614  | 0.35501  |
| Co | 2.20026  | 3.13676  | -0.24467 | H  | 7.16188  | 0.77694  | 0.57631  |
| O  | -1.02301 | -0.21594 | 2.22751  | C  | 6.05554  | -1.03694 | 0.36077  |
| C  | -2.27647 | -0.56417 | 2.81386  | H  | 6.90439  | -1.67378 | 0.59277  |
| H  | -2.11256 | -1.12053 | 3.73986  | C  | 4.79323  | -1.65132 | 0.08220  |
| H  | -2.79178 | -1.19508 | 2.08665  | C  | 3.68888  | -0.83350 | -0.24146 |
| C  | -3.08767 | 0.69810  | 3.09877  | C  | 3.83324  | 0.60643  | -0.22075 |
| H  | -3.21922 | 1.28709  | 2.18887  | C  | 4.66679  | -3.08866 | 0.18191  |
| H  | -2.59351 | 1.29459  | 3.86571  | H  | 5.57410  | -3.64107 | 0.44310  |
| H  | -6.32801 | -1.55522 | -2.11710 | C  | 3.49624  | -5.20078 | 0.26746  |
| H  | -6.39263 | 1.08074  | -2.16539 | H  | 3.19357  | -5.34781 | 1.31111  |
| H  | 3.11766  | -6.73708 | -0.16899 | C  | 2.42850  | -5.79116 | -0.66142 |
| H  | 5.34795  | -5.34615 | 0.08699  | H  | 2.83687  | -5.88343 | -1.67576 |
| H  | 4.99954  | 5.59881  | 0.11782  | C  | 0.09293  | -5.24524 | -0.95936 |
| H  | 2.71395  | 6.85431  | -0.28723 | H  | -0.09484 | -6.31677 | -1.07379 |
| C  | 0.88105  | -5.45235 | -0.66957 | C  | -1.04911 | -4.36779 | -1.09975 |
| H  | 0.83385  | -6.53429 | -0.81974 | C  | -2.35685 | -4.94128 | -1.20005 |
| O  | -0.17987 | 0.20641  | 4.32202  | H  | -2.45103 | -6.02337 | -1.18493 |
| C  | 0.04331  | 0.17694  | 3.11403  | C  | -3.47407 | -4.15556 | -1.29456 |
| O  | 1.07092  | 0.43056  | 2.42812  | H  | -4.46075 | -4.60463 | -1.35690 |
|    |          |          |          | C  | -3.36596 | -2.72730 | -1.28711 |
|    |          |          |          | C  | -2.08677 | -2.13311 | -1.21297 |
|    |          |          |          | C  | -0.90143 | -2.96411 | -1.14958 |
|    |          |          |          | C  | -4.55634 | -1.92735 | -1.28569 |
|    |          |          |          | H  | -5.50774 | -2.46567 | -1.28289 |
|    |          |          |          | C  | -4.49293 | 0.04680  | 3.18459  |
|    |          |          |          | C  | -5.21810 | 1.09805  | 3.98679  |
|    |          |          |          | H  | -5.25843 | 0.81420  | 5.04126  |
|    |          |          |          | H  | -6.22563 | 1.23016  | 3.59364  |
|    |          |          |          | H  | -4.67523 | 2.04645  | 3.92172  |
|    |          |          |          | Ca | 0.42810  | 0.13181  | -0.58460 |

### E1'-EO

Energy: -1870383.0126958

|   |          |          |          |    |          |          |          |
|---|----------|----------|----------|----|----------|----------|----------|
| O | -1.86397 | -0.84110 | -1.16802 | C  | -4.55634 | -1.92735 | -1.28569 |
| O | -1.64360 | 1.64603  | -0.94697 | H  | -5.50774 | -2.46567 | -1.28289 |
| O | 0.63857  | 2.67508  | -0.38817 | C  | -4.49293 | 0.04680  | 3.18459  |
| O | 2.72974  | 1.27019  | -0.48378 | C  | -5.21810 | 1.09805  | 3.98679  |
| O | 2.49319  | -1.25930 | -0.55111 | H  | -5.25843 | 0.81420  | 5.04126  |
| O | 0.23574  | -2.31752 | -1.13197 | H  | -6.22563 | 1.23016  | 3.59364  |
| O | -4.88931 | -0.44270 | 2.14249  | H  | -4.67523 | 2.04645  | 3.92172  |
| O | -3.32210 | -0.28581 | 3.76054  | Ca | 0.42810  | 0.13181  | -0.58460 |



|    |          |          |          |   |          |          |          |
|----|----------|----------|----------|---|----------|----------|----------|
| Co | 1.86648  | -3.04095 | -0.46871 | C | 3.59379  | -5.21494 | -0.27174 |
| Co | 2.46083  | 3.10175  | -0.18109 | H | 3.87937  | -5.12675 | -1.32738 |
| Co | -3.10933 | 0.53957  | -1.19064 | C | -0.14287 | -4.69549 | -0.25023 |
| O  | -0.32065 | -2.29512 | 3.22123  | C | -1.24385 | -5.54931 | -0.58003 |
| C  | -1.17404 | -1.30597 | 3.80065  | H | -1.05238 | -6.60689 | -0.73957 |
| H  | -0.70447 | -0.32014 | 3.76617  | C | -2.50841 | -5.04653 | -0.72328 |
| H  | -1.31319 | -1.60424 | 4.84325  | H | -3.33372 | -5.70015 | -0.99143 |
| C  | -2.51453 | -1.27075 | 3.07622  | C | -2.76564 | -3.64721 | -0.55917 |
| H  | -3.01349 | -2.24380 | 3.11819  | C | -1.71117 | -2.78329 | -0.18208 |
| H  | -2.38360 | -0.98306 | 2.03190  | C | -0.37278 | -3.32234 | 0.00079  |
| H  | 4.46583  | -5.68799 | 0.11681  | C | -4.09401 | -3.15098 | -0.81954 |
| H  | 2.11687  | -6.78629 | -0.32591 | H | -4.86859 | -3.89806 | -1.01650 |
| H  | 5.49770  | 5.18513  | 0.53178  | C | -5.80803 | -1.45741 | -1.06195 |
| H  | 3.34387  | 6.70098  | 0.38002  | H | -6.24452 | -1.25185 | -0.07835 |
| H  | -6.46212 | 2.18094  | -1.28581 | C | -5.75891 | -0.16080 | -1.87866 |
| H  | -6.69189 | -0.43340 | -1.59269 | H | -5.57279 | -0.39842 | -2.93369 |
| C  | 5.26287  | 2.61467  | 0.13208  | C | -4.59765 | 1.92930  | -1.55215 |
| H  | 6.28296  | 2.97839  | 0.28182  | H | -5.46615 | 2.41535  | -2.00637 |
| C  | 0.36087  | -1.95297 | 2.06150  | C | -3.48347 | 2.78585  | -1.22489 |
| O  | 1.07708  | -2.88306 | 1.62434  | C | -3.60480 | 4.19252  | -1.46540 |
| O  | 0.18871  | -0.79152 | 1.60355  | H | -4.55156 | 4.57666  | -1.83441 |

### F1-EO

Energy: -1895499.4318341

|   |          |          |          |    |          |          |          |
|---|----------|----------|----------|----|----------|----------|----------|
| O | -0.04023 | 2.58607  | -0.11242 | C  | -1.13941 | 3.16214  | -0.52764 |
| O | 2.25678  | 1.66750  | 0.45820  | C  | -2.26278 | 2.26544  | -0.73715 |
| O | 2.58262  | -0.87252 | 0.76649  | C  | -0.21435 | 5.47487  | -0.57148 |
| O | 0.53589  | -2.45912 | 0.36247  | H  | -0.44297 | 6.53393  | -0.72008 |
| O | -1.81781 | -1.49047 | -0.00311 | C  | -4.57224 | -0.03134 | 2.82866  |
| O | -2.02884 | 1.00874  | -0.46226 | C  | -5.78915 | -0.55366 | 3.55440  |
| O | -4.42363 | -0.12854 | 1.61580  | H  | -5.63337 | -1.61340 | 3.78394  |
| O | -3.69659 | 0.52496  | 3.66346  | H  | -6.66474 | -0.47137 | 2.90865  |
| O | 1.01896  | -0.39189 | -1.91868 | H  | -5.95363 | -0.02034 | 4.49150  |
| O | 2.47433  | -2.12941 | -1.89786 | C  | 1.81583  | -1.20843 | -2.46692 |
| N | 0.99325  | 5.15254  | -0.21931 | C  | 2.01142  | -1.05411 | -3.97986 |
| N | 3.38500  | 4.16500  | 0.05725  | H  | 1.03889  | -1.04507 | -4.48208 |
| N | 4.30106  | -3.02399 | 0.47688  | H  | 2.62900  | -1.85352 | -4.39340 |
| N | 2.28218  | -4.57581 | -0.10265 | H  | 2.48892  | -0.09031 | -4.18865 |
| N | -4.42582 | -1.89824 | -0.85112 | Ca | 0.25726  | 0.04273  | 0.35141  |
| N | -4.63122 | 0.64470  | -1.38166 | Co | -3.26018 | -0.42006 | -0.59006 |
| C | 2.01270  | 6.17079  | 0.07008  | Co | 2.42369  | -2.69930 | 0.23910  |
| H | 1.99138  | 6.37521  | 1.14785  | Co | 1.64919  | 3.39573  | 0.05913  |
| C | 3.37591  | 5.58958  | -0.31604 | O  | -0.16751 | 0.36616  | 2.62369  |
| H | 3.51017  | 5.65959  | -1.40282 | C  | -1.31691 | -0.07632 | 3.22383  |
| C | 4.50390  | 3.52487  | 0.22592  | H  | -1.19900 | -0.31706 | 4.30673  |
| H | 5.43532  | 4.09583  | 0.17343  | H  | -1.74132 | -1.00244 | 2.76923  |
| C | 4.63205  | 2.10791  | 0.43629  | C  | -2.42095 | 0.99472  | 3.12260  |
| C | 5.94447  | 1.53655  | 0.49793  | H  | -2.56026 | 1.28550  | 2.08118  |
| H | 6.80463  | 2.19817  | 0.45110  | H  | -2.17098 | 1.87239  | 3.72434  |
| C | 6.11360  | 0.18129  | 0.57991  | H  | -6.41026 | -2.22227 | -1.56477 |
| H | 7.11211  | -0.24667 | 0.59646  | H  | -6.70541 | 0.38663  | -1.81323 |
| C | 4.98933  | -0.70311 | 0.62038  | H  | 3.56716  | -6.27904 | -0.01111 |
| C | 3.67794  | -0.17318 | 0.64962  | H  | 5.63366  | -4.68051 | 0.29418  |
| C | 3.50043  | 1.26368  | 0.51834  | H  | 4.19145  | 6.13893  | 0.16600  |
| C | 5.22185  | -2.12715 | 0.63548  | H  | 1.81396  | 7.10755  | -0.46163 |
| H | 6.25529  | -2.45727 | 0.77990  | C  | 1.18682  | -5.25408 | -0.24593 |
| C | 4.60363  | -4.45633 | 0.59353  | H  | 1.26273  | -6.33133 | -0.42327 |
| H | 4.48018  | -4.75158 | 1.64345  |    |          |          |          |

**F2-EO**

Energy: -1895500.1338226

|   |          |          |          |
|---|----------|----------|----------|
| O | 2.02472  | -1.32514 | 0.00912  |
| O | 2.17349  | 1.22643  | -0.12783 |
| O | 0.03299  | 2.61930  | -0.25221 |
| O | -2.19972 | 1.56771  | 0.27415  |
| O | -2.37582 | -0.98202 | 0.38077  |
| O | -0.24271 | -2.46264 | 0.38489  |
| O | -1.79741 | -2.51034 | -2.14273 |
| O | -0.59175 | -0.59356 | -2.18548 |
| O | -0.06833 | 0.34097  | 2.52426  |
| O | 1.34754  | -0.14812 | 4.21729  |
| N | 4.71653  | -1.55212 | -0.69872 |
| N | 4.91505  | 1.05282  | -0.60660 |
| N | -1.18052 | 5.08344  | -0.66243 |
| N | -3.46333 | 4.01688  | 0.00071  |
| N | -3.94096 | -3.23432 | -0.10353 |
| N | -1.79944 | -4.72626 | 0.02302  |
| C | 6.01396  | -1.03382 | -1.15764 |
| H | 5.99228  | -0.95794 | -2.25271 |
| C | 6.20360  | 0.36125  | -0.54903 |
| H | 6.45580  | 0.25937  | 0.51204  |
| C | 4.82119  | 2.32571  | -0.81581 |
| H | 5.73358  | 2.89064  | -1.03132 |
| C | 3.58521  | 3.07946  | -0.79041 |
| C | 3.62464  | 4.47427  | -1.10787 |
| H | 4.58578  | 4.92514  | -1.33967 |
| C | 2.48625  | 5.23489  | -1.12522 |
| H | 2.53384  | 6.29279  | -1.36721 |
| C | 1.21028  | 4.65144  | -0.83526 |
| C | 1.13738  | 3.27545  | -0.51990 |
| C | 2.34688  | 2.47458  | -0.47100 |
| C | 0.03406  | 5.47783  | -0.90580 |
| H | 0.18664  | 6.51862  | -1.20534 |
| C | -2.33468 | 5.96911  | -0.88699 |
| H | -2.63346 | 5.88447  | -1.93942 |
| C | -3.48075 | 5.48602  | 0.00942  |
| H | -3.30976 | 5.82435  | 1.03909  |
| C | -4.59853 | 1.87340  | 0.16739  |
| C | -5.87198 | 1.21802  | 0.12731  |
| H | -6.77082 | 1.82647  | 0.08440  |
| C | -5.95758 | -0.14813 | 0.10901  |
| H | -6.92670 | -0.63486 | 0.04271  |
| C | -4.78261 | -0.96574 | 0.14927  |
| C | -3.51389 | -0.35403 | 0.27380  |
| C | -3.42169 | 1.09485  | 0.24696  |
| C | -4.92353 | -2.39474 | -0.00348 |
| H | -5.94579 | -2.77703 | -0.08314 |
| C | -4.17967 | -4.64963 | -0.41735 |
| H | -4.14708 | -4.76100 | -1.50815 |
| C | -3.04989 | -5.47211 | 0.21077  |
| H | -3.23197 | -5.58027 | 1.28784  |
| C | -0.65460 | -5.32828 | -0.05480 |
| H | -0.63843 | -6.42268 | -0.05596 |
| C | 0.61934  | -4.65890 | -0.15444 |
| C | 1.78816  | -5.42910 | -0.45215 |
| H | 1.68621  | -6.50358 | -0.57810 |
| C | 3.00916  | -4.82648 | -0.60193 |

|    |          |          |          |
|----|----------|----------|----------|
| H  | 3.88607  | -5.41934 | -0.84788 |
| C  | 3.15824  | -3.40977 | -0.46224 |
| C  | 2.02904  | -2.62514 | -0.13063 |
| C  | 0.73730  | -3.26432 | 0.04710  |
| C  | 4.44418  | -2.81684 | -0.75694 |
| H  | 5.22818  | -3.50653 | -1.08655 |
| C  | -1.18384 | -1.57381 | -2.73145 |
| C  | -1.15659 | -1.61452 | -4.26252 |
| H  | -1.61600 | -2.52473 | -4.65199 |
| H  | -0.12331 | -1.54568 | -4.61713 |
| H  | -1.69060 | -0.74484 | -4.66081 |
| C  | 0.22936  | 0.35490  | 3.71749  |
| C  | -0.66288 | 0.96192  | 4.76952  |
| H  | -0.67493 | 2.04833  | 4.63521  |
| H  | -0.31642 | 0.72844  | 5.77597  |
| H  | -1.68391 | 0.60059  | 4.62637  |
| Ca | -0.09318 | 0.05480  | 0.07249  |
| Co | -2.07777 | -2.83044 | 0.03518  |
| Co | -1.69955 | 3.32938  | -0.14844 |
| Co | 3.51655  | -0.15304 | -0.16279 |
| H  | -5.16108 | -4.98757 | -0.06572 |
| H  | -2.99694 | -6.47468 | -0.22865 |
| H  | -4.44409 | 5.88366  | -0.32755 |
| H  | -2.08699 | 7.01644  | -0.68426 |
| H  | 6.99800  | 0.91745  | -1.06078 |
| H  | 6.83882  | -1.69966 | -0.87923 |
| O  | 4.17741  | -0.16606 | 1.84792  |
| C  | 3.32230  | 0.36416  | 2.78001  |
| C  | 2.33615  | -0.70728 | 3.28737  |
| H  | 2.70391  | 1.20434  | 2.39507  |
| H  | 3.85019  | 0.76939  | 3.67357  |
| H  | 1.81720  | -1.16334 | 2.44551  |
| H  | 2.84926  | -1.47527 | 3.87027  |
| C  | -4.54917 | 3.31187  | 0.10399  |
| H  | -5.50667 | 3.83915  | 0.13980  |

**G1-EO**

Energy: -2013832.7717485

|   |          |          |          |
|---|----------|----------|----------|
| O | -1.49009 | 2.47852  | 0.11673  |
| O | 1.04149  | 2.56142  | 0.21503  |
| O | 2.40042  | 0.38109  | 0.04335  |
| O | 1.10376  | -1.84020 | -0.44097 |
| O | -1.46425 | -1.90381 | -0.41558 |
| O | -2.73395 | 0.26145  | -0.26229 |
| O | 3.60986  | -2.15612 | 2.68377  |
| O | 1.99165  | -2.08978 | 4.27540  |
| O | 0.35629  | 0.51918  | -2.33391 |
| O | 2.35389  | -0.46217 | -2.76860 |
| N | -1.60450 | 5.22945  | 0.42745  |
| N | 0.98504  | 5.32543  | 0.16854  |
| N | 4.74927  | -0.80834 | -0.80506 |
| N | 3.44102  | -2.99372 | -1.39964 |
| N | -3.77210 | -3.30591 | -0.74341 |
| N | -5.08893 | -1.07229 | -0.71097 |
| C | -1.03317 | 6.54347  | 0.75831  |
| H | -0.90702 | 6.59281  | 1.84703  |
| C | 0.33449  | 6.64335  | 0.07670  |
| H | 0.19860  | 6.88470  | -0.98506 |

|    |          |          |          |   |          |          |          |
|----|----------|----------|----------|---|----------|----------|----------|
| C  | 2.27566  | 5.20529  | 0.06277  | H | 0.44063  | 0.06753  | 4.28636  |
| H  | 2.87241  | 6.11929  | -0.00541 | H | 1.64568  | 0.23810  | 3.00482  |
| C  | 2.99591  | 3.96243  | -0.00970 | C | 0.95508  | -1.76498 | 3.29868  |
| C  | 4.41417  | 3.99350  | -0.21173 | H | 1.25566  | -2.13081 | 2.31568  |
| H  | 4.91528  | 4.95653  | -0.24769 | H | 0.06780  | -2.30661 | 3.63636  |
| C  | 5.12097  | 2.83463  | -0.38674 | H | -5.57196 | -4.38120 | -1.13831 |
| H  | 6.19196  | 2.86817  | -0.56658 | H | -6.93271 | -2.14483 | -0.75550 |
| C  | 4.47147  | 1.55956  | -0.36057 | H | 5.29180  | -4.00294 | -1.74225 |
| C  | 3.08658  | 1.48285  | -0.08362 | H | 6.57389  | -1.73111 | -1.41570 |
| C  | 2.33169  | 2.71638  | 0.05683  | H | 0.94667  | 7.42922  | 0.53140  |
| C  | 5.25022  | 0.37003  | -0.61112 | H | -1.69201 | 7.36266  | 0.45084  |
| H  | 6.33739  | 0.49001  | -0.64843 | C | 2.70492  | -4.05569 | -1.50353 |
| C  | 5.60847  | -1.98821 | -0.96545 | H | 3.17353  | -4.98248 | -1.84831 |
| H  | 5.79543  | -2.41566 | 0.02766  | C | -3.30275 | -3.15476 | 3.06957  |
| C  | 4.84778  | -3.00435 | -1.82276 | O | -4.27724 | -2.53881 | 2.86918  |
| H  | 4.88503  | -2.69467 | -2.87454 | O | -2.33511 | -3.77828 | 3.27292  |
| C  | 1.28421  | -4.10869 | -1.25262 |   |          |          |          |
| C  | 0.57464  | -5.32006 | -1.52936 |   |          |          |          |
| H  | 1.14048  | -6.18997 | -1.85149 |   |          |          |          |
| C  | -0.78826 | -5.39093 | -1.41214 |   |          |          |          |
| H  | -1.31394 | -6.31632 | -1.62844 |   |          |          |          |
| C  | -1.54707 | -4.23681 | -1.03457 |   |          |          |          |
| C  | -0.87406 | -3.03461 | -0.73501 |   |          |          |          |
| C  | 0.57264  | -2.97456 | -0.79466 |   |          |          |          |
| C  | -2.98110 | -4.31473 | -0.96892 |   |          |          |          |
| H  | -3.43150 | -5.29951 | -1.11774 |   |          |          |          |
| C  | -5.22457 | -3.49066 | -0.60410 |   |          |          |          |
| H  | -5.44910 | -3.61479 | 0.46166  |   |          |          |          |
| C  | -5.90593 | -2.22463 | -1.12772 |   |          |          |          |
| H  | -5.93777 | -2.24574 | -2.22373 |   |          |          |          |
| C  | -5.61927 | 0.11412  | -0.59627 |   |          |          |          |
| H  | -6.69904 | 0.20926  | -0.73964 |   |          |          |          |
| C  | -4.90041 | 1.32188  | -0.31900 |   |          |          |          |
| C  | -5.61875 | 2.55816  | -0.21284 |   |          |          |          |
| H  | -6.70016 | 2.54207  | -0.31090 |   |          |          |          |
| C  | -4.95902 | 3.73537  | 0.00282  |   |          |          |          |
| H  | -5.51154 | 4.66709  | 0.08257  |   |          |          |          |
| C  | -3.53078 | 3.77495  | 0.12238  |   |          |          |          |
| C  | -2.79040 | 2.57570  | 0.02890  |   |          |          |          |
| C  | -3.49192 | 1.32160  | -0.18877 |   |          |          |          |
| C  | -2.88697 | 5.04453  | 0.34503  |   |          |          |          |
| H  | -3.54275 | 5.91205  | 0.45853  |   |          |          |          |
| C  | 3.25414  | -2.23046 | 3.84860  |   |          |          |          |
| C  | 4.18746  | -2.50206 | 5.00699  |   |          |          |          |
| H  | 4.18760  | -1.64772 | 5.69063  |   |          |          |          |
| H  | 5.19757  | -2.67403 | 4.63605  |   |          |          |          |
| H  | 3.84421  | -3.37294 | 5.57244  |   |          |          |          |
| C  | 1.31685  | 0.19112  | -3.09095 |   |          |          |          |
| C  | 1.21910  | 0.65246  | -4.54992 |   |          |          |          |
| H  | 0.23166  | 0.41125  | -4.95475 |   |          |          |          |
| H  | 1.99298  | 0.19864  | -5.17185 |   |          |          |          |
| H  | 1.32635  | 1.74243  | -4.59152 |   |          |          |          |
| Ca | -0.12690 | 0.28401  | 0.04721  |   |          |          |          |
| Co | -3.26354 | -1.51004 | -0.50696 |   |          |          |          |
| Co | 2.89032  | -1.27264 | -0.77032 |   |          |          |          |
| Co | -0.26383 | 3.90091  | 0.24801  |   |          |          |          |
| O  | -0.33023 | 0.02292  | 2.34710  |   |          |          |          |
| C  | 0.67040  | -0.25155 | 3.24223  |   |          |          |          |

## G2-EO

Energy: -2013829.2247763

|   |          |          |          |
|---|----------|----------|----------|
| O | 1.47925  | -1.19964 | -0.53518 |
| O | 1.58638  | 1.34129  | -0.61559 |
| O | -0.52103 | 2.76135  | -0.29775 |
| O | -2.61740 | 1.66464  | 0.50851  |
| O | -2.76148 | -0.88955 | 0.53683  |
| O | -0.68510 | -2.35142 | 0.17098  |
| O | -2.65181 | -2.42806 | -2.07334 |
| O | -1.48185 | -0.51375 | -2.37564 |
| O | 7.84278  | 0.07244  | 1.14614  |
| O | 6.64651  | -0.09859 | 3.06581  |
| N | 4.09253  | -1.39501 | -1.46293 |
| N | 4.29063  | 1.21134  | -1.32786 |
| N | -1.70900 | 5.21690  | -0.22925 |
| N | -3.85685 | 4.09570  | 0.69971  |
| N | -4.39308 | -3.14214 | 0.31011  |
| N | -2.25408 | -4.63011 | 0.05960  |
| C | 5.29201  | -0.85391 | -2.12338 |
| H | 5.08544  | -0.77050 | -3.19828 |
| C | 5.57705  | 0.53763  | -1.54444 |
| H | 6.07948  | 0.43667  | -0.57615 |
| C | 4.16711  | 2.49353  | -1.45601 |
| H | 5.03780  | 3.07247  | -1.77930 |
| C | 2.95497  | 3.24661  | -1.20683 |
| C | 2.98092  | 4.66593  | -1.37755 |
| H | 3.91618  | 5.13382  | -1.67298 |
| C | 1.86466  | 5.43503  | -1.17396 |
| H | 1.90507  | 6.51253  | -1.30315 |
| C | 0.62530  | 4.83061  | -0.79117 |
| C | 0.56505  | 3.43161  | -0.62907 |
| C | 1.74671  | 2.61840  | -0.81964 |
| C | -0.54097 | 5.65051  | -0.60720 |
| H | -0.43147 | 6.71782  | -0.81607 |
| C | -2.87117 | 6.12064  | -0.18794 |
| H | -3.33107 | 6.13039  | -1.18339 |
| C | -3.86578 | 5.56061  | 0.83160  |
| H | -3.54101 | 5.81618  | 1.84733  |
| C | -4.97782 | 1.95141  | 0.93425  |
| C | -6.23456 | 1.28771  | 1.12029  |
| H | -7.12149 | 1.88824  | 1.29959  |

|    |          |          |          |                          |          |          |          |
|----|----------|----------|----------|--------------------------|----------|----------|----------|
| C  | -6.32219 | -0.07595 | 1.04353  | <b>H1-EO</b>             |          |          |          |
| H  | -7.28503 | -0.56729 | 1.15236  | Energy: -2013856.3347730 |          |          |          |
| C  | -5.16578 | -0.88688 | 0.80200  | O                        | 0.14858  | 2.54935  | -0.45276 |
| C  | -3.89976 | -0.27014 | 0.69250  | O                        | 2.39186  | 1.73509  | 0.39227  |
| C  | -3.81486 | 1.17775  | 0.71808  | O                        | 2.76000  | -0.76447 | 0.86475  |
| C  | -5.33711 | -2.31203 | 0.62374  | O                        | 0.87919  | -2.42273 | 0.17074  |
| H  | -6.35640 | -2.69582 | 0.72773  | O                        | -1.40211 | -1.56544 | -0.63355 |
| C  | -4.67912 | -4.55117 | 0.00850  | O                        | -1.72944 | 0.89195  | -1.02625 |
| H  | -4.82617 | -4.63724 | -1.07496 | O                        | -6.32992 | -1.02894 | 1.57157  |
| C  | -3.46106 | -5.38360 | 0.42589  | O                        | -5.68588 | 0.52643  | 3.08940  |
| H  | -3.46826 | -5.51948 | 1.51498  | O                        | 1.67532  | -0.47117 | -2.06618 |
| C  | -1.12563 | -5.22572 | -0.17155 | O                        | 3.18385  | -2.12590 | -1.71998 |
| H  | -1.10309 | -6.31992 | -0.17180 | N                        | 1.03622  | 5.17077  | -0.33089 |
| C  | 0.12062  | -4.54959 | -0.44194 | N                        | 3.43444  | 4.28676  | 0.18928  |
| C  | 1.25585  | -5.31013 | -0.87169 | N                        | 4.57689  | -2.85149 | 0.94944  |
| H  | 1.15362  | -6.38726 | -0.97120 | N                        | 2.71589  | -4.50605 | 0.14005  |
| C  | 2.44385  | -4.69705 | -1.17302 | N                        | -3.93970 | -2.08602 | -1.45181 |
| H  | 3.29187  | -5.28565 | -1.51266 | N                        | -4.25211 | 0.43502  | -1.96247 |
| C  | 2.59345  | -3.27621 | -1.07127 | C                        | 1.97614  | 6.22727  | 0.07446  |
| C  | 1.49663  | -2.50051 | -0.63012 | H                        | 1.83542  | 6.41180  | 1.14669  |
| C  | 0.24905  | -3.15293 | -0.27822 | C                        | 3.39696  | 5.71263  | -0.17632 |
| C  | 3.82147  | -2.66232 | -1.52259 | H                        | 3.63531  | 5.79830  | -1.24395 |
| H  | 4.55709  | -3.33207 | -1.97993 | C                        | 4.55076  | 3.70094  | 0.50789  |
| C  | -2.16558 | -1.50302 | -2.78447 | H                        | 5.45177  | 4.31658  | 0.57935  |
| C  | -2.41972 | -1.57137 | -4.29236 | C                        | 4.71485  | 2.29196  | 0.75120  |
| H  | -3.01798 | -2.44297 | -4.56308 | C                        | 6.02344  | 1.78048  | 1.03206  |
| H  | -1.46317 | -1.60855 | -4.82409 | H                        | 6.85314  | 2.47813  | 1.10085  |
| H  | -2.93307 | -0.66166 | -4.62080 | C                        | 6.23244  | 0.43601  | 1.18510  |
| C  | 7.74392  | -0.26728 | 2.31367  | H                        | 7.23292  | 0.05563  | 1.37160  |
| C  | 8.84844  | -0.92795 | 3.10588  | C                        | 5.15255  | -0.49825 | 1.08616  |
| H  | 8.53099  | -1.92578 | 3.42339  | C                        | 3.83556  | -0.02439 | 0.88771  |
| H  | 9.06271  | -0.35059 | 4.00962  | C                        | 3.62493  | 1.39595  | 0.67233  |
| H  | 9.74606  | -1.00658 | 2.49313  | C                        | 5.43035  | -1.91101 | 1.20419  |
| Ca | -0.61073 | 0.14752  | -0.26144 | H                        | 6.43966  | -2.19057 | 1.52149  |
| Co | -2.53712 | -2.73769 | 0.12647  | C                        | 4.90086  | -4.26626 | 1.17571  |
| Co | -2.16799 | 3.43804  | 0.17540  | H                        | 4.62770  | -4.52225 | 2.20739  |
| Co | 2.94498  | -0.01515 | -0.77788 | C                        | 4.05828  | -5.09920 | 0.20361  |
| H  | -5.58932 | -4.90054 | 0.50881  | H                        | 4.49813  | -5.04281 | -0.79963 |
| H  | -3.47997 | -6.37463 | -0.04127 | C                        | 0.33785  | -4.72360 | -0.32735 |
| H  | -4.86793 | 5.97409  | 0.67659  | C                        | -0.70518 | -5.63313 | -0.69754 |
| H  | -2.57527 | 7.14418  | 0.06436  | H                        | -0.47572 | -6.69431 | -0.73999 |
| H  | 6.22938  | 1.11282  | -2.21250 | C                        | -1.96384 | -5.18961 | -1.00329 |
| H  | 6.15678  | -1.51513 | -1.99562 | H                        | -2.74537 | -5.89202 | -1.27748 |
| O  | 3.44116  | 0.02807  | 1.25770  | C                        | -2.26639 | -3.78879 | -0.99462 |
| C  | 4.55243  | -0.56577 | 1.79403  | C                        | -1.26079 | -2.86871 | -0.63013 |
| C  | 5.47162  | 0.49211  | 2.43382  | C                        | 0.05040  | -3.34296 | -0.23030 |
| H  | 5.17210  | -1.12464 | 1.05756  | C                        | -3.58163 | -3.33503 | -1.34460 |
| H  | 4.32121  | -1.30855 | 2.59531  | H                        | -4.33918 | -4.10246 | -1.52388 |
| H  | 5.79562  | 1.21947  | 1.68647  | C                        | -5.34242 | -1.71475 | -1.69838 |
| H  | 4.95030  | 1.00935  | 3.24333  | H                        | -5.82387 | -1.55803 | -0.72706 |
| C  | -4.91823 | 3.38336  | 0.96078  | C                        | -5.33827 | -0.40803 | -2.49259 |
| H  | -5.84028 | 3.91118  | 1.21902  | H                        | -5.12507 | -0.61263 | -3.54865 |
| C  | -1.58564 | -1.33777 | 3.46679  | C                        | -4.29841 | 1.73124  | -2.08639 |
| O  | -2.18353 | -2.33900 | 3.55414  | H                        | -5.19858 | 2.17402  | -2.52038 |
| O  | -0.98518 | -0.33589 | 3.40578  | C                        | -3.24629 | 2.63647  | -1.71801 |
|    |          |          |          | C                        | -3.43462 | 4.04622  | -1.88823 |
|    |          |          |          | H                        | -4.38647 | 4.40335  | -2.27001 |
|    |          |          |          | C                        | -2.43626 | 4.92877  | -1.57793 |

|    |          |          |          |   |          |          |          |
|----|----------|----------|----------|---|----------|----------|----------|
| H  | -2.58950 | 5.99615  | -1.70802 | H | 6.14164  | -1.14926 | -0.19720 |
| C  | -1.17245 | 4.47502  | -1.07944 | C | 5.33402  | -2.51337 | -1.66792 |
| C  | -0.95486 | 3.09029  | -0.89815 | H | 5.27095  | -2.56970 | -2.76199 |
| C  | -2.01540 | 2.15640  | -1.22163 | C | 3.48416  | -3.87160 | -0.89883 |
| C  | -0.15737 | 5.44765  | -0.76034 | H | 4.13224  | -4.73839 | -1.05688 |
| H  | -0.43063 | 6.49897  | -0.88540 | C | 2.13363  | -4.14686 | -0.47958 |
| C  | -6.57178 | -0.32661 | 2.53604  | C | 1.71431  | -5.50854 | -0.32670 |
| C  | -7.89092 | -0.28272 | 3.26636  | H | 2.43944  | -6.29975 | -0.49421 |
| H  | -7.74248 | -0.53068 | 4.32114  | C | 0.41976  | -5.81221 | 0.00130  |
| H  | -8.58578 | -0.98886 | 2.81317  | H | 0.10809  | -6.84908 | 0.09268  |
| H  | -8.30706 | 0.72805  | 3.22348  | C | -0.55321 | -4.78433 | 0.21518  |
| C  | 2.60241  | -1.25254 | -2.43040 | C | -0.15940 | -3.42781 | 0.13847  |
| C  | 3.07126  | -1.11759 | -3.88346 | C | 1.20205  | -3.10919 | -0.25340 |
| H  | 2.21628  | -1.22033 | -4.55938 | C | -1.91357 | -5.15740 | 0.53205  |
| H  | 3.82785  | -1.86183 | -4.13837 | H | -2.09716 | -6.21727 | 0.73401  |
| H  | 3.48563  | -0.11593 | -4.04162 | C | -4.24740 | -4.76902 | 1.02134  |
| Ca | 0.52095  | 0.03982  | 0.00631  | H | -4.29317 | -4.70163 | 2.11591  |
| Co | -2.83523 | -0.57823 | -1.25532 | C | -5.28033 | -3.81316 | 0.40994  |
| Co | 2.75722  | -2.61141 | 0.39694  | H | -5.43090 | -4.06731 | -0.64653 |
| Co | 1.75344  | 3.43948  | -0.04127 | C | -5.06628 | -0.04258 | 0.59804  |
| O  | -2.15481 | -0.39653 | 2.54482  | C | -6.01302 | 1.02449  | 0.75680  |
| C  | -3.42466 | -0.39200 | 3.19042  | H | -7.05340 | 0.77241  | 0.94360  |
| H  | -3.32088 | -0.13286 | 4.24741  | C | -5.62448 | 2.33709  | 0.68525  |
| H  | -3.81893 | -1.40807 | 3.09732  | H | -6.35201 | 3.13086  | 0.83150  |
| C  | -4.36510 | 0.59515  | 2.50029  | C | -4.26315 | 2.69621  | 0.40559  |
| H  | -4.42678 | 0.38195  | 1.43168  | C | -3.32051 | 1.66746  | 0.19565  |
| H  | -4.02198 | 1.61667  | 2.66434  | C | -3.71052 | 0.28133  | 0.37874  |
| H  | -5.87827 | -2.50446 | -2.23591 | C | -3.87191 | 4.08420  | 0.35904  |
| H  | -6.30595 | 0.10038  | -2.42896 | H | -4.65580 | 4.82215  | 0.55540  |
| H  | 4.02726  | -6.15165 | 0.50737  | C | -2.32563 | 5.93863  | 0.21801  |
| H  | 5.97055  | -4.46540 | 1.04594  | H | -1.94221 | 6.13679  | 1.22652  |
| H  | 4.13368  | 6.29444  | 0.38750  | C | -1.22558 | 6.22771  | -0.81207 |
| H  | 1.79117  | 7.16322  | -0.46324 | H | -1.67337 | 6.29850  | -1.81163 |
| C  | 1.67102  | -5.23308 | -0.10734 | C | 0.94287  | 5.23005  | -1.18918 |
| H  | 1.80018  | -6.31581 | -0.19885 | H | 1.30584  | 6.23092  | -1.44247 |
| C  | -1.26732 | 0.64981  | 2.88372  | C | 1.89397  | 4.14776  | -1.30636 |
| O  | -0.19419 | 0.58830  | 2.21827  | C | 3.26700  | 4.45258  | -1.57152 |
| O  | -1.61470 | 1.46458  | 3.74790  | H | 3.55481  | 5.49385  | -1.68745 |

### HI'-EO

Energy: -2013864.9567907

|   |          |          |          |    |          |          |          |
|---|----------|----------|----------|----|----------|----------|----------|
| O | 2.05488  | 0.54208  | -1.00859 | C  | 2.50296  | 1.75444  | -1.23221 |
| O | 1.45433  | -1.82938 | -0.38333 | C  | 1.49367  | 2.79617  | -1.18926 |
| O | -0.92737 | -2.40188 | 0.38310  | C  | 4.88392  | 1.08249  | -1.52413 |
| O | -2.72472 | -0.56609 | 0.31128  | H  | 5.90409  | 1.43635  | -1.69781 |
| O | -2.07848 | 1.83140  | -0.15993 | C  | 4.66476  | -0.72410 | 3.13517  |
| O | 0.26643  | 2.38100  | -1.03045 | C  | 5.20453  | -1.85667 | 3.97244  |
| O | 5.06900  | -0.41217 | 2.02916  | H  | 5.42528  | -1.51023 | 4.98524  |
| O | 3.65576  | -0.09209 | 3.76176  | H  | 6.10420  | -2.26027 | 3.50892  |
| O | -1.22710 | -0.96474 | -2.38867 | H  | 4.44961  | -2.64524 | 4.05183  |
| O | -2.79827 | -2.52886 | -1.91756 | C  | -2.08777 | -1.83921 | -2.70666 |
| N | 4.69976  | -0.19125 | -1.34928 | C  | -2.28268 | -2.08435 | -4.20686 |
| N | 3.97783  | -2.69000 | -1.12168 | H  | -2.55839 | -1.14677 | -4.70068 |
| N | -2.91193 | -4.33311 | 0.58797  | H  | -3.05171 | -2.83471 | -4.39911 |
| N | -4.73669 | -2.45122 | 0.47478  | H  | -1.33756 | -2.41422 | -4.65119 |
| N | -2.66534 | 4.51259  | 0.13461  | Ca | -0.36972 | -0.01066 | -0.34007 |
| N | -0.28769 | 5.09543  | -0.80607 | Co | -1.14583 | 3.45370  | -0.33474 |
| C | 5.83123  | -1.12680 | -1.24815 | Co | -2.83261 | -2.44456 | 0.29212  |

|    |          |          |          |   |         |          |          |
|----|----------|----------|----------|---|---------|----------|----------|
| Co | 3.05441  | -1.04200 | -0.96137 | C | 1.07610 | 4.69658  | -0.28187 |
| O  | 1.12962  | 2.49493  | 3.25214  | C | 2.30817 | 5.32589  | -0.65005 |
| C  | 1.78116  | 1.37362  | 3.84834  | H | 2.31177 | 6.39719  | -0.83149 |
| H  | 1.10755  | 0.51492  | 3.90008  | C | 3.45593 | 4.59517  | -0.80318 |
| H  | 2.05091  | 1.68436  | 4.86176  | H | 4.38010 | 5.08118  | -1.10352 |
| C  | 3.03079  | 1.00612  | 3.05708  | C | 3.46121 | 3.17755  | -0.60062 |
| H  | 3.72871  | 1.84775  | 3.00608  | C | 2.27531 | 2.53145  | -0.18136 |
| H  | 2.76987  | 0.69763  | 2.04391  | C | 1.05822 | 3.30855  | -0.01029 |
| H  | -3.19922 | 6.57900  | 0.05063  | C | 4.67533 | 2.44245  | -0.86984 |
| H  | -0.71984 | 7.17559  | -0.59672 | H | 5.55974 | 3.03395  | -1.12553 |
| H  | -6.24500 | -3.89582 | 0.92375  | C | 6.05814 | 0.46251  | -1.06439 |
| H  | -4.44946 | -5.80724 | 0.73482  | H | 6.47132 | 0.22210  | -0.07932 |
| H  | 6.01450  | -3.29907 | -1.32251 | C | 5.75757 | -0.84129 | -1.81577 |
| H  | 6.67979  | -0.80622 | -1.86223 | H | 5.57264 | -0.61995 | -2.87477 |
| C  | -5.50599 | -1.41684 | 0.63890  | C | 4.28873 | -2.69005 | -1.30543 |
| H  | -6.57664 | -1.58480 | 0.79179  | H | 5.05183 | -3.34779 | -1.73269 |
| C  | 0.30652  | 2.24592  | 2.15354  | C | 3.05843 | -3.32370 | -0.88443 |
| O  | -0.20913 | 3.29388  | 1.69663  | C | 2.94522 | -4.74841 | -0.97068 |
| O  | 0.18606  | 1.05357  | 1.77628  | H | 3.81322 | -5.32030 | -1.28655 |

### TS<sub>AF1</sub>

Energy: -1991989.7902181

|   |          |          |          |    |          |          |          |
|---|----------|----------|----------|----|----------|----------|----------|
| O | -0.31178 | -2.44212 | 0.09796  | C  | 0.60900  | -4.64860 | -0.27564 |
| O | -2.41086 | -1.09745 | 0.48477  | C  | 0.68306  | -3.23822 | -0.20017 |
| O | -2.26645 | 1.44212  | 0.76141  | C  | 1.94313  | -2.56799 | -0.46059 |
| O | 0.00949  | 2.62933  | 0.36935  | C  | -0.60115 | -5.36423 | 0.06011  |
| O | 2.15023  | 1.24694  | 0.04751  | H  | -0.52841 | -6.45531 | 0.09732  |
| O | 1.92084  | -1.26831 | -0.29932 | C  | 4.66215  | -0.53201 | 2.80963  |
| O | 4.47576  | -0.52807 | 1.56298  | C  | 6.11236  | -0.41557 | 3.29376  |
| O | 3.77649  | -0.62468 | 3.71763  | H  | 6.51821  | 0.55561  | 2.99046  |
| O | -0.80239 | 0.79316  | -2.00458 | H  | 6.72516  | -1.18669 | 2.81668  |
| O | -1.95376 | 2.74017  | -1.89595 | H  | 6.18422  | -0.51056 | 4.37875  |
| N | -1.74210 | -4.81214 | 0.33497  | C  | -1.41759 | 1.77927  | -2.51747 |
| N | -3.94475 | -3.40950 | 0.56699  | C  | -1.54566 | 1.78342  | -4.04361 |
| N | -3.58613 | 3.86511  | 0.55857  | H  | -0.60280 | 1.47794  | -4.50562 |
| N | -1.32611 | 5.03213  | -0.06993 | H  | -1.84325 | 2.76433  | -4.41911 |
| N | 4.78367  | 1.15196  | -0.84487 | H  | -2.30591 | 1.05251  | -4.34305 |
| N | 4.53146  | -1.41966 | -1.24539 | Ca | -0.18546 | 0.12242  | 0.24106  |
| C | -2.89889 | -5.59562 | 0.79392  | Co | 3.39930  | -0.09252 | -0.46087 |
| H | -2.85380 | -5.66056 | 1.88835  | Co | -1.80345 | 3.21521  | 0.26746  |
| C | -4.17275 | -4.84977 | 0.37626  | Co | -2.12120 | -2.94669 | 0.29533  |
| H | -4.36115 | -5.02127 | -0.69042 | O  | 0.13516  | -0.10474 | 2.63587  |
| C | -4.92914 | -2.57879 | 0.73053  | C  | 1.19478  | 0.60208  | 3.24580  |
| H | -5.94077 | -2.98595 | 0.82011  | H  | 1.01041  | 0.90425  | 4.28460  |
| C | -4.80860 | -1.14160 | 0.78714  | H  | 1.60228  | 1.43703  | 2.66402  |
| C | -5.99144 | -0.34384 | 0.92709  | C  | 1.82895  | -0.69428 | 3.04588  |
| H | -6.95108 | -0.84594 | 1.01287  | H  | 2.19450  | -0.94702 | 2.06556  |
| C | -5.92431 | 1.02435  | 0.92752  | H  | 1.62651  | -1.48068 | 3.75743  |
| H | -6.83201 | 1.61659  | 1.00495  | H  | 6.77360  | 1.08403  | -1.61474 |
| C | -4.66862 | 1.70558  | 0.82031  | H  | 6.60109  | -1.53770 | -1.75464 |
| C | -3.47549 | 0.95097  | 0.76084  | H  | -2.28740 | 6.93720  | 0.03220  |
| C | -3.55622 | -0.49691 | 0.67598  | H  | -4.60035 | 5.73418  | 0.36829  |
| C | -4.64099 | 3.14853  | 0.79656  | H  | -5.04113 | -5.20436 | 0.94236  |
| H | -5.58816 | 3.66169  | 0.99002  | H  | -2.88671 | -6.61418 | 0.39046  |
| C | -3.62404 | 5.33148  | 0.66066  | O  | -2.57727 | -3.08455 | -2.03309 |
| H | -3.43914 | 5.61017  | 1.70607  | C  | -2.38079 | -2.03257 | -3.01142 |
| C | -2.50600 | 5.89394  | -0.22265 | C  | -1.60789 | -3.27739 | -3.08699 |
| H | -2.81762 | 5.85563  | -1.27386 | H  | -1.90708 | -1.12993 | -2.63134 |
|   |          |          |          | H  | -3.22685 | -1.89312 | -3.68137 |

|   |          |          |          |
|---|----------|----------|----------|
| H | -0.57239 | -3.28430 | -2.75737 |
| H | -1.88014 | -4.04110 | -3.81233 |
| C | -0.12841 | 5.49195  | -0.25637 |
| H | -0.00782 | 6.56182  | -0.45270 |

### TS<sub>AF2</sub>

Energy: -1991986.6214020

|   |          |          |          |
|---|----------|----------|----------|
| O | -2.54584 | -0.06523 | -0.19803 |
| O | -1.16944 | -2.18931 | 0.02665  |
| O | 1.38551  | -2.05982 | -0.08115 |
| O | 2.52665  | 0.20924  | 0.03277  |
| O | 1.12407  | 2.34604  | -0.04995 |
| O | -1.41391 | 2.20451  | 0.01025  |
| O | -0.29524 | 1.84748  | -3.46130 |
| O | -0.10933 | -0.19874 | -2.52281 |
| O | 0.15897  | 0.22676  | 2.26615  |
| O | -1.10578 | 0.40111  | 4.12770  |
| N | -4.86782 | -1.54970 | -0.51916 |
| N | -3.46925 | -3.73969 | -0.11701 |
| N | 3.81719  | -3.34546 | 0.26121  |
| N | 4.95692  | -1.00482 | 0.59993  |
| N | 1.00502  | 5.10300  | -0.03066 |
| N | -1.60654 | 4.95839  | 0.03489  |
| C | -5.59190 | -2.79126 | -0.83105 |
| H | -5.50867 | -2.97544 | -1.90980 |
| C | -4.92250 | -3.93982 | -0.06302 |
| H | -5.22144 | -3.89270 | 0.99052  |
| C | -2.63391 | -4.73037 | -0.07103 |
| H | -3.03421 | -5.74891 | -0.07173 |
| C | -1.19355 | -4.60545 | -0.01138 |
| C | -0.38905 | -5.78996 | 0.04178  |
| H | -0.88592 | -6.75623 | 0.03506  |
| C | 0.97710  | -5.71848 | 0.11768  |
| H | 1.57042  | -6.62643 | 0.18111  |
| C | 1.65422  | -4.45505 | 0.10907  |
| C | 0.89349  | -3.26909 | 0.00285  |
| C | -0.55819 | -3.34321 | 0.00512  |
| C | 3.09319  | -4.42207 | 0.21742  |
| H | 3.60122  | -5.38969 | 0.26980  |
| C | 5.28559  | -3.39529 | 0.26593  |
| H | 5.62429  | -3.37797 | -0.77680 |
| C | 5.80246  | -2.14565 | 0.99014  |
| H | 5.70819  | -2.28502 | 2.07448  |
| C | 4.58054  | 1.40115  | 0.48098  |
| C | 5.18820  | 2.69321  | 0.60935  |
| H | 6.25502  | 2.74814  | 0.80718  |
| C | 4.45019  | 3.84050  | 0.48784  |
| H | 4.92845  | 4.81170  | 0.57736  |
| C | 3.03658  | 3.78947  | 0.25530  |
| C | 2.40428  | 2.53228  | 0.13590  |
| C | 3.19595  | 1.31587  | 0.21220  |
| C | 2.29326  | 5.01802  | 0.11852  |
| H | 2.87356  | 5.94501  | 0.12853  |
| C | 0.33484  | 6.38786  | -0.28320 |
| H | 0.27449  | 6.53171  | -1.36912 |
| C | -1.08088 | 6.30643  | 0.30181  |
| H | -1.03586 | 6.44679  | 1.38914  |
| C | -2.88115 | 4.73148  | -0.08405 |

|    |          |          |          |
|----|----------|----------|----------|
| H  | -3.56167 | 5.58726  | -0.05885 |
| C  | -3.48423 | 3.43070  | -0.23142 |
| C  | -4.90193 | 3.32247  | -0.41405 |
| H  | -5.49173 | 4.23337  | -0.46414 |
| C  | -5.50862 | 2.09889  | -0.52792 |
| H  | -6.58352 | 2.03486  | -0.67278 |
| C  | -4.75377 | 0.88333  | -0.45611 |
| C  | -3.35551 | 0.95622  | -0.27447 |
| C  | -2.71081 | 2.25148  | -0.16373 |
| C  | -5.42932 | -0.38633 | -0.62662 |
| H  | -6.49211 | -0.34068 | -0.88419 |
| C  | -0.31872 | 0.59934  | -3.50555 |
| C  | -0.61327 | -0.08314 | -4.85011 |
| H  | -0.81533 | 0.65042  | -5.63354 |
| H  | -1.47343 | -0.75364 | -4.75028 |
| H  | 0.23948  | -0.70230 | -5.15006 |
| C  | -0.02211 | 0.53369  | 3.47450  |
| C  | 1.17150  | 1.09696  | 4.24729  |
| H  | 1.88682  | 0.28880  | 4.43784  |
| H  | 0.86660  | 1.52716  | 5.20292  |
| H  | 1.68471  | 1.84957  | 3.64223  |
| Ca | -0.01188 | 0.07176  | -0.13753 |
| Co | -0.22416 | 3.65484  | -0.01955 |
| Co | 3.19632  | -1.55466 | 0.11296  |
| Co | -3.04472 | -1.88849 | -0.05875 |
| H  | 0.89232  | 7.22810  | 0.14453  |
| H  | -1.72728 | 7.08479  | -0.11767 |
| H  | 6.85828  | -1.96516 | 0.76005  |
| H  | 5.66231  | -4.30930 | 0.73841  |
| H  | -5.21956 | -4.91327 | -0.46975 |
| H  | -6.65568 | -2.71659 | -0.57890 |
| O  | -3.51545 | -1.84838 | 2.10883  |
| C  | -2.40403 | -1.93190 | 2.97331  |
| C  | -2.58636 | -0.48486 | 3.00735  |
| H  | -1.47526 | -2.28228 | 2.51254  |
| H  | -2.59824 | -2.46466 | 3.91456  |
| H  | -2.26939 | 0.07939  | 2.14976  |
| H  | -3.34454 | -0.07407 | 3.65879  |
| C  | 5.38317  | 0.21773  | 0.69156  |
| H  | 6.42481  | 0.38340  | 0.98256  |
| O  | 3.80958  | -1.64835 | -2.14266 |
| C  | 3.93234  | -0.48968 | -2.99891 |
| C  | 2.86999  | -1.47346 | -3.23592 |
| H  | 4.82185  | -0.48934 | -3.62504 |
| H  | 3.68459  | 0.45403  | -2.52090 |
| H  | 2.99182  | -2.20111 | -4.03572 |
| H  | 1.85153  | -1.23742 | -2.93363 |

### TS<sub>AF1-EO</sub>

Energy: -1895474.6753932

|   |          |          |          |
|---|----------|----------|----------|
| O | -0.29545 | -2.45539 | 0.41873  |
| O | -2.48241 | -1.04715 | 0.56444  |
| O | -2.41652 | 1.51918  | 0.43560  |
| O | -0.24494 | 2.65364  | -0.14411 |
| O | 1.95482  | 1.31427  | -0.21783 |
| O | 1.90491  | -1.23472 | -0.10699 |
| O | 4.36155  | -0.07075 | 1.61932  |
| O | 3.61754  | -0.28610 | 3.75199  |

|   |          |          |          |                            |          |          |          |
|---|----------|----------|----------|----------------------------|----------|----------|----------|
| O | -0.85134 | -0.60840 | -2.07217 | H                          | 6.54185  | -0.94204 | 2.89350  |
| O | -2.01775 | -2.54864 | -1.98787 | C                          | -1.45924 | -1.58957 | -2.59651 |
| N | -1.79319 | -4.76936 | 0.16181  | C                          | -1.51485 | -1.61150 | -4.12751 |
| N | -3.99210 | -3.35661 | 0.19494  | H                          | -1.95947 | -0.68109 | -4.49526 |
| N | -3.75212 | 3.88987  | 0.32893  | H                          | -2.08923 | -2.46091 | -4.50159 |
| N | -1.56347 | 5.04530  | -0.43738 | H                          | -0.49695 | -1.66010 | -4.52904 |
| N | 4.64114  | 1.24424  | -0.96151 | Ca                         | -0.27820 | 0.06584  | 0.17086  |
| N | 4.51408  | -1.36021 | -1.07905 | Co                         | 3.30901  | -0.01341 | -0.45238 |
| C | -2.99808 | -5.55924 | 0.44475  | Co                         | -1.99027 | 3.27907  | 0.07433  |
| H | -3.09313 | -5.66781 | 1.53276  | Co                         | -2.13859 | -2.88551 | 0.19864  |
| C | -4.20139 | -4.78132 | -0.09745 | O                          | 0.02987  | 0.36807  | 2.55355  |
| H | -4.24829 | -4.89653 | -1.18728 | C                          | 1.13402  | 1.07465  | 3.07768  |
| C | -4.99537 | -2.55474 | 0.36761  | H                          | 0.96521  | 1.52592  | 4.06361  |
| H | -6.00556 | -2.97526 | 0.36425  | H                          | 1.60518  | 1.79297  | 2.39710  |
| C | -4.89784 | -1.12099 | 0.51147  | C                          | 1.66931  | -0.28020 | 3.06389  |
| C | -6.10107 | -0.34962 | 0.56601  | H                          | 2.01738  | -0.69153 | 2.13185  |
| H | -7.05284 | -0.87366 | 0.57118  | H                          | 1.40783  | -0.94496 | 3.87338  |
| C | -6.06952 | 1.01970  | 0.59003  | H                          | 6.65973  | 1.18856  | -1.65280 |
| H | -6.99127 | 1.59287  | 0.62415  | H                          | 6.60932  | -1.43910 | -1.48022 |
| C | -4.82219 | 1.71924  | 0.53607  | H                          | -2.52148 | 6.94956  | -0.34607 |
| C | -3.61820 | 0.98651  | 0.51185  | H                          | -4.82199 | 5.72056  | 0.09805  |
| C | -3.64601 | -0.46133 | 0.54146  | H                          | -5.13990 | -5.15326 | 0.32869  |
| C | -4.81384 | 3.15679  | 0.49284  | H                          | -2.94161 | -6.56143 | 0.00503  |
| H | -5.77670 | 3.66157  | 0.60560  | C                          | -0.38105 | 5.49259  | -0.76064 |
| C | -3.82594 | 5.35807  | 0.37278  | H                          | -0.29425 | 6.54172  | -1.05603 |
| H | -3.61217 | 5.67890  | 1.39930  |                            |          |          |          |
| C | -2.75315 | 5.90330  | -0.57164 |                            |          |          |          |
| H | -3.10640 | 5.84477  | -1.60820 |                            |          |          |          |
| C | 0.82403  | 4.71988  | -0.78432 |                            |          |          |          |
| C | 2.05135  | 5.35256  | -1.16690 |                            |          |          |          |
| H | 2.04310  | 6.41437  | -1.39445 |                            |          |          |          |
| C | 3.20823  | 4.62993  | -1.25819 |                            |          |          |          |
| H | 4.13222  | 5.11316  | -1.56299 |                            |          |          |          |
| C | 3.23687  | 3.22825  | -0.96505 |                            |          |          |          |
| C | 2.05431  | 2.57627  | -0.54787 |                            |          |          |          |
| C | 0.81822  | 3.33768  | -0.48069 |                            |          |          |          |
| C | 4.48592  | 2.51805  | -1.12397 |                            |          |          |          |
| H | 5.35557  | 3.11735  | -1.40924 |                            |          |          |          |
| C | 5.95349  | 0.59796  | -1.05859 |                            |          |          |          |
| H | 6.33519  | 0.49603  | -0.03759 |                            |          |          |          |
| C | 5.74212  | -0.79488 | -1.66196 |                            |          |          |          |
| H | 5.60231  | -0.70904 | -2.74715 |                            |          |          |          |
| C | 4.28595  | -2.63523 | -1.10881 |                            |          |          |          |
| H | 5.06618  | -3.29306 | -1.50376 |                            |          |          |          |
| C | 3.05719  | -3.27656 | -0.70438 |                            |          |          |          |
| C | 2.94957  | -4.69743 | -0.84303 |                            |          |          |          |
| H | 3.82289  | -5.25632 | -1.16741 |                            |          |          |          |
| C | 1.76673  | -5.34180 | -0.59653 |                            |          |          |          |
| H | 1.69154  | -6.41845 | -0.72160 |                            |          |          |          |
| C | 0.60081  | -4.61455 | -0.19965 |                            |          |          |          |
| C | 0.68349  | -3.21736 | 0.00465  |                            |          |          |          |
| C | 1.93649  | -2.53555 | -0.26610 |                            |          |          |          |
| C | -0.63760 | -5.33017 | -0.00488 |                            |          |          |          |
| H | -0.58179 | -6.42309 | -0.00971 |                            |          |          |          |
| C | 4.52159  | -0.17010 | 2.86591  |                            |          |          |          |
| C | 5.96680  | -0.14703 | 3.37899  |                            |          |          |          |
| H | 6.01241  | -0.27433 | 4.46208  |                            |          |          |          |
| H | 6.43563  | 0.80462  | 3.10720  |                            |          |          |          |
|   |          |          |          | <b>TS<sub>AF</sub>2-EO</b> |          |          |          |
|   |          |          |          | Energy: -1895477.9721146   |          |          |          |
|   |          |          |          | O                          | 1.99581  | -1.37136 | 0.00423  |
|   |          |          |          | O                          | 2.20699  | 1.16986  | -0.12334 |
|   |          |          |          | O                          | 0.09848  | 2.64373  | -0.19638 |
|   |          |          |          | O                          | -2.17245 | 1.64369  | 0.22931  |
|   |          |          |          | O                          | -2.40498 | -0.91583 | 0.35029  |
|   |          |          |          | O                          | -0.30173 | -2.45782 | 0.38551  |
|   |          |          |          | O                          | -1.82646 | -2.42858 | -2.16134 |
|   |          |          |          | O                          | -0.57191 | -0.54289 | -2.11682 |
|   |          |          |          | O                          | -0.04281 | 0.26999  | 2.55269  |
|   |          |          |          | O                          | 1.19769  | -0.26469 | 4.36071  |
|   |          |          |          | N                          | 4.67910  | -1.66351 | -0.70043 |
|   |          |          |          | N                          | 4.94225  | 0.93394  | -0.60919 |
|   |          |          |          | N                          | -1.04701 | 5.10487  | -0.60047 |
|   |          |          |          | N                          | -3.35158 | 4.08974  | 0.00880  |
|   |          |          |          | N                          | -4.01290 | -3.12922 | -0.16798 |
|   |          |          |          | N                          | -1.91085 | -4.67444 | -0.01008 |
|   |          |          |          | C                          | 5.98728  | -1.17914 | -1.16993 |
|   |          |          |          | H                          | 5.95858  | -1.10807 | -2.26478 |
|   |          |          |          | C                          | 6.21835  | 0.21347  | -0.57150 |
|   |          |          |          | H                          | 6.50108  | 0.11331  | 0.48238  |
|   |          |          |          | C                          | 4.87593  | 2.21154  | -0.80367 |
|   |          |          |          | H                          | 5.80088  | 2.75626  | -1.01554 |
|   |          |          |          | C                          | 3.66044  | 2.99494  | -0.76567 |
|   |          |          |          | C                          | 3.73860  | 4.39272  | -1.06906 |
|   |          |          |          | H                          | 4.71120  | 4.81722  | -1.30181 |
|   |          |          |          | C                          | 2.62401  | 5.18471  | -1.07369 |
|   |          |          |          | H                          | 2.69856  | 6.24242  | -1.30830 |
|   |          |          |          | C                          | 1.33435  | 4.63282  | -0.77925 |
|   |          |          |          | C                          | 1.22168  | 3.25696  | -0.46856 |
|   |          |          |          | C                          | 2.40941  | 2.41956  | -0.44565 |



|    |          |          |          |                          |          |          |          |
|----|----------|----------|----------|--------------------------|----------|----------|----------|
| C  | 0.18018  | 5.47696  | -0.84409 | H                        | 3.16519  | -1.33895 | 3.75120  |
| H  | 0.34969  | 6.51595  | -1.13969 | C                        | -4.46488 | 3.42171  | 0.08218  |
| C  | -2.16999 | 6.03173  | -0.82315 | H                        | -5.40214 | 3.98314  | 0.11391  |
| H  | -2.45148 | 5.98634  | -1.88214 |                          |          |          |          |
| C  | -3.33880 | 5.55961  | 0.04394  | <b>TS<sub>BC1</sub></b>  |          |          |          |
| H  | -3.17869 | 5.87363  | 1.08227  | Energy: -1848511.2864062 |          |          |          |
| C  | -4.56173 | 1.98717  | 0.12180  | O                        | 0.14329  | 2.53636  | -0.01079 |
| C  | -5.84895 | 1.36418  | 0.06481  | O                        | 2.43114  | 1.48446  | 0.17458  |
| H  | -6.73386 | 1.99203  | 0.01905  | O                        | 2.66553  | -1.05258 | 0.34587  |
| C  | -5.96078 | -0.00068 | 0.03388  | O                        | 0.63755  | -2.50663 | -0.06457 |
| H  | -6.93918 | -0.46630 | -0.04680 | O                        | -1.70523 | -1.47627 | -0.12247 |
| C  | -4.80598 | -0.84317 | 0.08253  | O                        | -1.91831 | 1.05002  | -0.28254 |
| C  | -3.52359 | -0.26043 | 0.22520  | O                        | -4.20706 | -0.23686 | 1.64815  |
| C  | -3.40584 | 1.18359  | 0.20052  | O                        | -3.61177 | 0.45280  | 3.72346  |
| C  | -4.97725 | -2.26830 | -0.07640 | N                        | 1.27198  | 5.06611  | -0.09953 |
| H  | -6.00686 | -2.62714 | -0.16850 | N                        | 3.64023  | 3.96949  | -0.06541 |
| C  | -4.28127 | -4.53831 | -0.48553 | N                        | 4.31097  | -3.27885 | 0.35639  |
| H  | -4.23356 | -4.65105 | -1.57561 | N                        | 2.24940  | -4.76170 | -0.24855 |
| C  | -3.18269 | -5.38763 | 0.16143  | N                        | -4.39354 | -1.78008 | -0.78400 |
| H  | -3.38267 | -5.48685 | 1.23608  | N                        | -4.57508 | 0.81247  | -1.09578 |
| C  | -0.78189 | -5.30680 | -0.07211 | C                        | 2.35803  | 6.02427  | 0.15642  |
| H  | -0.79431 | -6.40116 | -0.07129 | H                        | 2.43296  | 6.16954  | 1.24110  |
| C  | 0.51031  | -4.67017 | -0.15829 | C                        | 3.65949  | 5.41050  | -0.37117 |
| C  | 1.66092  | -5.46914 | -0.44946 | H                        | 3.70474  | 5.52586  | -1.46116 |
| H  | 1.53271  | -6.54069 | -0.57563 | C                        | 4.73965  | 3.28776  | 0.04740  |
| C  | 2.89738  | -4.89837 | -0.59343 | H                        | 5.68919  | 3.82663  | -0.00989 |
| H  | 3.76076  | -5.51237 | -0.83437 | C                        | 4.82116  | 1.85670  | 0.21200  |
| C  | 3.07818  | -3.48461 | -0.45649 | C                        | 6.10989  | 1.23834  | 0.29563  |
| C  | 1.96741  | -2.67311 | -0.12921 | H                        | 6.99269  | 1.87053  | 0.27985  |
| C  | 0.65959  | -3.27926 | 0.04841  | C                        | 6.23637  | -0.12261 | 0.38052  |
| C  | 4.37645  | -2.92293 | -0.74832 | H                        | 7.22028  | -0.57896 | 0.43539  |
| H  | 5.14769  | -3.63087 | -1.06764 | C                        | 5.08401  | -0.97211 | 0.38506  |
| C  | -1.19511 | -1.47556 | -2.70602 | C                        | 3.79829  | -0.39161 | 0.33415  |
| C  | -1.17271 | -1.44353 | -4.23790 | C                        | 3.66470  | 1.04746  | 0.24319  |
| H  | -1.77122 | -2.24710 | -4.67066 | C                        | 5.26496  | -2.40307 | 0.44054  |
| H  | -0.13961 | -1.53516 | -4.59019 | H                        | 6.28974  | -2.76444 | 0.56055  |
| H  | -1.54735 | -0.47814 | -4.59336 | C                        | 4.56097  | -4.72052 | 0.50381  |
| C  | 0.13150  | 0.13057  | 3.79570  | H                        | 4.40925  | -4.98460 | 1.55764  |
| C  | -1.04622 | 0.46254  | 4.71159  | C                        | 3.53948  | -5.46321 | -0.36469 |
| H  | -1.37175 | 1.49209  | 4.53171  | H                        | 3.85471  | -5.42670 | -1.41473 |
| H  | -0.78471 | 0.34047  | 5.76390  | C                        | -0.17493 | -4.74601 | -0.49068 |
| H  | -1.89053 | -0.19068 | 4.46810  | C                        | -1.32578 | -5.55134 | -0.76336 |
| Ca | -0.10200 | 0.06103  | 0.17444  | H                        | -1.19318 | -6.61934 | -0.90844 |
| Co | -2.14207 | -2.77155 | 0.00107  | C                        | -2.57161 | -4.98945 | -0.85721 |
| Co | -1.61567 | 3.37290  | -0.10819 | H                        | -3.43460 | -5.60930 | -1.08228 |
| Co | 3.50281  | -0.23901 | -0.20480 | C                        | -2.76695 | -3.58482 | -0.67151 |
| H  | -5.27627 | -4.85162 | -0.14986 | C                        | -1.65939 | -2.76795 | -0.35306 |
| H  | -3.14874 | -6.39264 | -0.27408 | C                        | -0.33700 | -3.35653 | -0.29295 |
| H  | -4.28905 | 5.98014  | -0.30127 | C                        | -4.09703 | -3.03809 | -0.83873 |
| H  | -1.89193 | 7.06388  | -0.58536 | H                        | -4.89942 | -3.75525 | -1.03471 |
| H  | 7.01132  | 0.75087  | -1.10400 | C                        | -5.77432 | -1.29387 | -0.87833 |
| H  | 6.79567  | -1.86517 | -0.89399 | H                        | -6.13342 | -1.15746 | 0.14646  |
| O  | 4.15182  | -0.28307 | 1.90437  | C                        | -5.74472 | 0.06515  | -1.58794 |
| C  | 3.45598  | 0.59423  | 2.76425  | H                        | -5.62470 | -0.08475 | -2.66840 |
| C  | 2.73242  | -0.63770 | 3.05219  | C                        | -4.51808 | 2.10280  | -1.17668 |
| H  | 2.88507  | 1.38412  | 2.26643  | H                        | -5.39346 | 2.64131  | -1.55148 |
| H  | 4.06144  | 1.00451  | 3.58361  | C                        | -3.36008 | 2.91046  | -0.85491 |
| H  | 2.02455  | -0.99120 | 2.32476  | C                        | -3.44635 | 4.32986  | -1.01041 |

|    |          |          |          |   |          |          |          |
|----|----------|----------|----------|---|----------|----------|----------|
| H  | -4.40088 | 4.76537  | -1.29112 | C | -6.12126 | -0.94859 | -0.37118 |
| C  | -2.35171 | 5.13207  | -0.82099 | H | -6.37653 | -0.77213 | 0.67948  |
| H  | -2.43300 | 6.20837  | -0.94105 | C | -4.55824 | -2.79415 | -0.45121 |
| C  | -1.07976 | 4.57235  | -0.48171 | H | -5.41888 | -3.46301 | -0.54350 |
| C  | -0.96497 | 3.17491  | -0.30882 | C | -3.25340 | -3.42103 | -0.39941 |
| C  | -2.12996 | 2.33195  | -0.47421 | C | -3.15854 | -4.84107 | -0.54406 |
| C  | 0.05220  | 5.45187  | -0.31812 | H | -4.07344 | -5.41267 | -0.67166 |
| H  | -0.14717 | 6.52501  | -0.38163 | C | -1.94592 | -5.47961 | -0.52710 |
| C  | -4.44822 | 0.06767  | 2.84924  | H | -1.89196 | -6.55861 | -0.63821 |
| C  | -5.90732 | -0.03925 | 3.30758  | C | -0.72857 | -4.74114 | -0.37736 |
| H  | -6.26465 | -1.06361 | 3.16001  | C | -0.79092 | -3.33821 | -0.23572 |
| H  | -6.53338 | 0.61460  | 2.69152  | C | -2.07283 | -2.66645 | -0.21874 |
| H  | -6.02062 | 0.23577  | 4.35769  | C | 0.52936  | -5.44544 | -0.40613 |
| Ca | 0.35337  | 0.00248  | 0.24452  | H | 0.47876  | -6.52769 | -0.55263 |
| Co | -3.20150 | -0.34086 | -0.43293 | C | 2.93757  | -5.68153 | -0.45778 |
| Co | 2.46471  | -2.90855 | 0.10962  | H | 3.18018  | -5.71159 | -1.52723 |
| Co | 1.87519  | 3.27041  | 0.00919  | C | 4.05933  | -4.96644 | 0.30313  |
| O  | 0.04357  | -0.01686 | 2.63292  | H | 3.96977  | -5.17779 | 1.37569  |
| C  | -0.99113 | -0.75867 | 3.25499  | C | 4.78936  | -1.25979 | 0.03085  |
| H  | -0.78280 | -1.05210 | 4.28974  | C | 5.99030  | -0.47950 | -0.02099 |
| H  | -1.38408 | -1.60135 | 2.67628  | H | 6.94581  | -0.99444 | 0.01213  |
| C  | -1.63316 | 0.53096  | 3.05139  | C | 5.94540  | 0.88467  | -0.11881 |
| H  | -2.02917 | 0.76836  | 2.07937  | H | 6.86339  | 1.46259  | -0.16732 |
| H  | -1.45586 | 1.32021  | 3.76589  | C | 4.69271  | 1.57865  | -0.16685 |
| H  | -6.42541 | -2.00282 | -1.40148 | C | 3.49063  | 0.83960  | -0.09633 |
| H  | -6.67563 | 0.61771  | -1.42169 | C | 3.54051  | -0.60504 | 0.00142  |
| H  | 3.45607  | -6.51348 | -0.06713 | C | 4.67758  | 3.00426  | -0.33034 |
| H  | 5.58670  | -4.98514 | 0.22685  | H | 5.64861  | 3.49596  | -0.43160 |
| H  | 4.53520  | 5.90386  | 0.06299  | C | 3.69996  | 5.18573  | -0.68709 |
| H  | 2.16007  | 6.99591  | -0.30792 | H | 3.70714  | 5.30966  | -1.77654 |
| O  | 0.69173  | -0.00763 | -2.25006 | C | 2.46359  | 5.86521  | -0.09486 |
| C  | 0.01753  | -0.83511 | -3.22763 | H | 2.59953  | 6.00262  | 0.98436  |
| C  | -0.12302 | 0.62464  | -3.26633 | C | 0.11025  | 5.43517  | -0.43450 |
| H  | -0.79127 | -1.44039 | -2.82739 | H | -0.02007 | 6.51952  | -0.47175 |
| H  | 0.68465  | -1.32969 | -3.92867 | C | -1.08148 | 4.63318  | -0.52999 |
| H  | -1.03376 | 1.08385  | -2.89203 | C | -2.34436 | 5.26384  | -0.75827 |
| H  | 0.44154  | 1.19917  | -3.99590 | H | -2.37916 | 6.34356  | -0.86789 |
| C  | 1.12413  | -5.37199 | -0.46652 | C | -3.49081 | 4.51784  | -0.85057 |
| H  | 1.15114  | -6.44649 | -0.66773 | H | -4.44288 | 5.00439  | -1.04274 |

## TS<sub>BC2</sub>

Energy: -1848512.6152328

|   |          |          |          |    |          |          |          |
|---|----------|----------|----------|----|----------|----------|----------|
| O | -2.08408 | 1.16084  | -0.26009 | C  | -3.46987 | 3.09628  | -0.69984 |
| O | -2.01567 | -1.37063 | -0.03963 | C  | -2.24050 | 2.44775  | -0.43986 |
| O | 0.24871  | -2.54102 | -0.12175 | C  | -1.02835 | 3.23295  | -0.37899 |
| O | 2.37083  | -1.19664 | 0.04203  | C  | -4.70104 | 2.35728  | -0.88869 |
| O | 2.28850  | 1.35412  | -0.13105 | H  | -5.57482 | 2.94376  | -1.18809 |
| O | 0.07689  | 2.54234  | -0.17832 | C  | 0.05610  | 0.54111  | 3.71064  |
| O | 0.25857  | 0.33808  | 2.47811  | C  | 1.26368  | 0.46471  | 4.64128  |
| O | -1.06256 | 0.80603  | 4.24593  | H  | 0.98462  | 0.65996  | 5.67761  |
| N | -4.82810 | 1.07487  | -0.76658 | H  | 2.01771  | 1.19096  | 4.32170  |
| N | -4.76968 | -1.51815 | -0.40011 | H  | 1.71841  | -0.52844 | 4.56681  |
| N | 1.70169  | -4.89723 | -0.29032 | Ca | 0.11971  | -0.00681 | 0.15149  |
| N | 3.88267  | -3.51823 | 0.11099  | Co | 1.81801  | 3.15534  | -0.23153 |
| N | 3.60647  | 3.74576  | -0.38874 | Co | 2.05216  | -3.04768 | -0.05188 |
| N | 1.31548  | 4.96642  | -0.29596 | Co | -3.46481 | -0.14666 | -0.21987 |
| C | -6.08350 | 0.39116  | -1.11779 | H  | 4.62104  | 5.62037  | -0.28531 |
| H | -6.08263 | 0.20818  | -2.19978 | H  | 2.29210  | 6.84684  | -0.54820 |
|   |          |          |          | H  | 5.04545  | -5.30314 | -0.03330 |
|   |          |          |          | H  | 2.81450  | -6.71050 | -0.10481 |
|   |          |          |          | H  | -6.86315 | -1.62639 | -0.80795 |

|   |          |          |          |   |         |          |          |
|---|----------|----------|----------|---|---------|----------|----------|
| H | -6.95961 | 1.00229  | -0.87555 | H | 3.98062 | 5.21326  | -1.24039 |
| O | -4.00963 | 0.09306  | 1.89630  | C | 3.10720 | 3.26784  | -0.83584 |
| C | -3.16901 | -0.55928 | 2.82287  | C | 1.91992 | 2.56834  | -0.52697 |
| C | -2.64336 | 0.79435  | 2.95611  | C | 0.66586 | 3.28897  | -0.47168 |
| H | -2.48831 | -1.30297 | 2.39589  | C | 4.37713 | 2.58981  | -0.99256 |
| H | -3.68710 | -0.96427 | 3.70225  | H | 5.24816 | 3.22289  | -1.18540 |
| H | -2.01473 | 1.17539  | 2.17234  | C | 5.87195 | 0.68722  | -1.02198 |
| H | -3.17399 | 1.49335  | 3.58635  | H | 6.22194 | 0.52378  | 0.00215  |
| C | 4.88836  | -2.69772 | 0.11948  | C | 5.70801 | -0.66706 | -1.72261 |
| H | 5.89537  | -3.11445 | 0.20393  | H | 5.60320 | -0.51175 | -2.80388 |
| O | 0.19764  | 0.00804  | -2.36812 | C | 4.28773 | -2.57166 | -1.29215 |
| C | 0.05900  | -1.10597 | -3.28149 | H | 5.10804 | -3.19904 | -1.65314 |
| C | 1.31289  | -0.34680 | -3.21836 | C | 3.05469 | -3.25598 | -0.96712 |
| H | -0.63589 | -0.92843 | -4.09815 | C | 3.00327 | -4.68082 | -1.08806 |
| H | -0.00278 | -2.07814 | -2.80040 | H | 3.91347 | -5.21264 | -1.34974 |
| H | 1.53744  | 0.38601  | -3.98897 | C | 1.83635 | -5.36980 | -0.88562 |
| H | 2.16612  | -0.76535 | -2.69148 | H | 1.81470 | -6.45190 | -0.97499 |

### TS<sub>BC1</sub>-EO

Energy: -1751996.0816843

|   |          |          |          |
|---|----------|----------|----------|
| O | -0.40384 | -2.52366 | -0.18336 |
| O | -2.57297 | -1.24845 | -0.06178 |
| O | -2.55710 | 1.29699  | 0.06723  |
| O | -0.39248 | 2.54308  | -0.25066 |
| O | 1.83160  | 1.27836  | -0.29615 |
| O | 1.79619  | -1.25425 | -0.44456 |
| O | 4.13950  | -0.23705 | 1.51436  |
| O | 3.52070  | 0.37847  | 3.60567  |
| N | -1.76608 | -4.93402 | -0.17227 |
| N | -4.02018 | -3.61371 | -0.16250 |
| N | -3.97205 | 3.67528  | 0.13763  |
| N | -1.76320 | 4.95171  | -0.42429 |
| N | 4.54617  | 1.30883  | -0.93050 |
| N | 4.47074  | -1.29191 | -1.22693 |
| C | -2.93700 | -5.77423 | 0.12144  |
| H | -3.01565 | -5.87783 | 1.21063  |
| C | -4.17897 | -5.05590 | -0.41816 |
| H | -4.24489 | -5.20203 | -1.50337 |
| C | -5.04718 | -2.82622 | -0.06031 |
| H | -6.04550 | -3.27139 | -0.08585 |
| C | -4.98639 | -1.38898 | 0.05809  |
| C | -6.20614 | -0.64636 | 0.15877  |
| H | -7.14593 | -1.19007 | 0.18136  |
| C | -6.19822 | 0.72213  | 0.21777  |
| H | -7.13153 | 1.27255  | 0.28901  |
| C | -4.96955 | 1.45564  | 0.17941  |
| C | -3.74949 | 0.75083  | 0.10023  |
| C | -3.75774 | -0.69462 | 0.03420  |
| C | -5.00725 | 2.89786  | 0.23109  |
| H | -5.99010 | 3.35819  | 0.36364  |
| C | -4.07835 | 5.13403  | 0.29878  |
| H | -3.91980 | 5.36918  | 1.35840  |
| C | -2.97420 | 5.78204  | -0.54348 |
| H | -3.27643 | 5.79452  | -1.59799 |
| C | 0.64758  | 4.68863  | -0.66141 |
| C | 1.87573  | 5.37249  | -0.92779 |
| H | 1.85374  | 6.44889  | -1.06996 |
| C | 3.05745  | 4.68531  | -1.01964 |

|    |          |          |          |
|----|----------|----------|----------|
| H  | 3.98062  | 5.21326  | -1.24039 |
| C  | 3.10720  | 3.26784  | -0.83584 |
| C  | 1.91992  | 2.56834  | -0.52697 |
| C  | 0.66586  | 3.28897  | -0.47168 |
| C  | 4.37713  | 2.58981  | -0.99256 |
| H  | 5.24816  | 3.22289  | -1.18540 |
| C  | 5.87195  | 0.68722  | -1.02198 |
| H  | 6.22194  | 0.52378  | 0.00215  |
| C  | 5.70801  | -0.66706 | -1.72261 |
| H  | 5.60320  | -0.51175 | -2.80388 |
| C  | 4.28773  | -2.57166 | -1.29215 |
| H  | 5.10804  | -3.19904 | -1.65314 |
| C  | 3.05469  | -3.25598 | -0.96712 |
| C  | 3.00327  | -4.68082 | -1.08806 |
| H  | 3.91347  | -5.21264 | -1.34974 |
| C  | 1.83635  | -5.36980 | -0.88562 |
| H  | 1.81470  | -6.45190 | -0.97499 |
| C  | 0.62156  | -4.68124 | -0.57189 |
| C  | 0.64094  | -3.27507 | -0.44481 |
| C  | 1.88352  | -2.55107 | -0.61295 |
| C  | -0.58900 | -5.44178 | -0.37859 |
| H  | -0.49244 | -6.53066 | -0.40235 |
| C  | 4.36822  | 0.02943  | 2.72665  |
| C  | 5.82570  | -0.06305 | 3.19406  |
| H  | 5.90324  | -0.00057 | 4.28108  |
| H  | 6.39838  | 0.76021  | 2.75196  |
| H  | 6.27455  | -0.99715 | 2.84388  |
| Ca | -0.35850 | 0.01189  | 0.05770  |
| Co | 3.21078  | -0.00278 | -0.58843 |
| Co | -2.17103 | 3.12526  | -0.10744 |
| Co | -2.19423 | -3.08607 | -0.13688 |
| O  | -0.08433 | -0.22703 | 2.42240  |
| C  | 1.54213  | 0.39175  | 2.92443  |
| H  | 1.30352  | 1.07563  | 3.72479  |
| H  | 1.92293  | 0.77214  | 1.99250  |
| C  | 1.00014  | -0.95759 | 2.96736  |
| H  | 1.46079  | -1.69367 | 2.30074  |
| H  | 0.80931  | -1.38485 | 3.95823  |
| H  | 6.58868  | 1.32503  | -1.55076 |
| H  | 6.58087  | -1.30664 | -1.55329 |
| H  | -2.78973 | 6.81375  | -0.22703 |
| H  | -5.06731 | 5.50362  | 0.00846  |
| H  | -5.09358 | -5.44921 | 0.03717  |
| H  | -2.83839 | -6.77456 | -0.31285 |
| C  | -0.57988 | 5.44508  | -0.63158 |
| H  | -0.49409 | 6.51891  | -0.81865 |

### TS<sub>BC2</sub>-EO

Energy: -1751998.0579250

|   |          |          |          |
|---|----------|----------|----------|
| O | 2.04919  | -1.11104 | -0.41242 |
| O | 1.97952  | 1.41458  | -0.13377 |
| O | -0.29310 | 2.57596  | -0.22246 |
| O | -2.41224 | 1.22258  | -0.06506 |
| O | -2.31269 | -1.32767 | -0.26980 |
| O | -0.10203 | -2.50233 | -0.33430 |
| O | -0.25576 | -0.33306 | 2.42449  |
| O | 1.10056  | -0.86521 | 4.14644  |
| N | 4.79598  | -1.01429 | -0.91887 |

|   |          |          |          |    |          |          |          |
|---|----------|----------|----------|----|----------|----------|----------|
| N | 4.73114  | 1.57110  | -0.53121 | C  | -0.12099 | -5.39788 | -0.59922 |
| N | -1.75825 | 4.91279  | -0.54274 | H  | 0.01569  | -6.48122 | -0.64080 |
| N | -3.93752 | 3.53784  | -0.14005 | C  | 1.06565  | -4.58799 | -0.69549 |
| N | -3.62109 | -3.72705 | -0.55826 | C  | 2.33003  | -5.21155 | -0.93035 |
| N | -1.32755 | -4.93603 | -0.45517 | H  | 2.36967  | -6.29054 | -1.04497 |
| C | 6.04923  | -0.32476 | -1.26638 | C  | 3.47260  | -4.45934 | -1.02246 |
| H | 6.04520  | -0.13089 | -2.34646 | H  | 4.42656  | -4.93997 | -1.21986 |
| C | 6.08452  | 1.00750  | -0.50666 | C  | 3.44475  | -3.03934 | -0.86402 |
| H | 6.34029  | 0.82158  | 0.54218  | C  | 2.21306  | -2.39781 | -0.59794 |
| C | 4.51173  | 2.84439  | -0.60090 | C  | 1.00634  | -3.18859 | -0.53861 |
| H | 5.36755  | 3.51739  | -0.70628 | C  | 4.67321  | -2.29547 | -1.05158 |
| C | 3.20276  | 3.46224  | -0.55933 | H  | 5.54756  | -2.87693 | -1.35877 |
| C | 3.10111  | 4.87587  | -0.75201 | C  | -0.02828 | -0.58013 | 3.64519  |
| H | 4.01310  | 5.44718  | -0.89994 | C  | -1.21560 | -0.53468 | 4.60266  |
| C | 1.88485  | 5.50640  | -0.76116 | H  | -0.91433 | -0.76555 | 5.62529  |
| H | 1.82347  | 6.57981  | -0.91484 | H  | -1.97716 | -1.24918 | 4.27456  |
| C | 0.67264  | 4.76606  | -0.58499 | H  | -1.67057 | 0.46062  | 4.57206  |
| C | 0.74160  | 3.37035  | -0.38142 | Ca | -0.15139 | 0.04251  | 0.11581  |
| C | 2.02749  | 2.70651  | -0.34935 | Co | -1.83804 | -3.12700 | -0.38386 |
| C | -0.58715 | 5.46233  | -0.65900 | Co | -2.10010 | 3.07091  | -0.23163 |
| H | -0.53888 | 6.53797  | -0.84857 | Co | 3.43020  | 0.19617  | -0.35015 |
| C | -2.99390 | 5.68350  | -0.76406 | H  | -4.62875 | -5.60529 | -0.45649 |
| H | -3.21556 | 5.67197  | -1.83839 | H  | -2.29270 | -6.82219 | -0.70819 |
| C | -4.12585 | 4.98994  | 0.00082  | H  | -5.10760 | 5.30919  | -0.36410 |
| H | -4.05629 | 5.23807  | 1.06704  | H  | -2.88293 | 6.72556  | -0.44727 |
| C | -4.82866 | 1.27487  | -0.18754 | H  | 6.82381  | 1.69187  | -0.93753 |
| C | -6.02449 | 0.49039  | -0.27111 | H  | 6.92683  | -0.93680 | -1.03233 |
| H | -6.98201 | 1.00267  | -0.27495 | O  | 3.99169  | -0.07121 | 1.75499  |
| C | -5.97195 | -0.87399 | -0.35453 | C  | 3.15126  | 0.55618  | 2.69846  |
| H | -6.88549 | -1.45653 | -0.42558 | C  | 2.65639  | -0.80927 | 2.83014  |
| C | -4.71515 | -1.56170 | -0.36313 | H  | 2.44937  | 1.28846  | 2.28651  |
| C | -3.51806 | -0.81764 | -0.26036 | H  | 3.67330  | 0.96547  | 3.57349  |
| C | -3.57579 | 0.62634  | -0.16012 | H  | 2.02527  | -1.20077 | 2.05334  |
| C | -4.69399 | -2.98711 | -0.52293 | H  | 3.21199  | -1.50132 | 3.44631  |
| H | -5.66204 | -3.48048 | -0.64282 | C  | -4.93885 | 2.71308  | -0.13426 |
| C | -3.70792 | -5.16776 | -0.85552 | H  | -5.94997 | 3.12586  | -0.08835 |
| H | -3.71048 | -5.29364 | -1.94475 |    |          |          |          |
| C | -2.47131 | -5.84080 | -0.25718 |    |          |          |          |
| H | -2.61056 | -5.97685 | 0.82176  |    |          |          |          |

## 7. References

- S1. A. B. Pangborn, M. A. Giardello, R. H. Grubbs, R. K. Rosen, F. J. Timmers, Safe and Convenient Procedure for Solvent Purification. *Organometallics* 1996, **15**, 1518-1520.
- S2. S. Akine, T. Taniguchi, T. Nabeshima, *J. Am. Chem. Soc.* 2006, **128**, 15765.
- S3. (a) M. C. Burla, R. Caliandro, M. Camalli, B. Carrozzini, G. L. Casciaro, L. De Caro, C. Giacovazzo, G. Polidori, D. Siliqi, R. Spagna, IL MILIONE: A Suite of Computer Programs for Crystal Structure Solution of Proteins. *J. Appl. Cryst.* 2007, **40**, 609–613; (b) G. M. Sheldrick, A Short History of SHELX. *Acta Crystallogr. Sect. A* 2008, **64**, 112–122; (c) CrystalClear: Data Collection and Processing Software, Rigaku Corporation (1998-2015). Tokyo 196-8666, Japan.
- S4. L. J. Farrugia, ORTEP-3 for Windows - A Version of ORTEP-III with a Graphical User Interface (GUI). *J. Appl. Crystallogr.* 1997, **30**, 565.
- S5. All the structures were optimized by using Gaussian16, Revision B.01: M. J. Frisch, G. W. Trucks, H. B. Schlegel, G. E. Scuseria, M. A. Robb, J. R. Cheeseman, G. Scalmani, V. Barone, B. Mennucci, G. A. Petersson, H. Nakatsuji, M. Caricato, X. Li, H. P. Hratchian, A. F. Izmaylov, J. Bloino, G. Zheng, J. L. Sonnenberg, M. Hada, M. Ehara, K. Toyota, R. Fukuda, J. Hasegawa, M. Ishida, T. Nakajima, Y. Honda, O. Kitao, H. Nakai, T. Vreven, J. A. Montgomery, Jr., J. E. Peralta, F. Ogliaro, M. Bearpark, J. J. Heyd, E. Brothers, K. N. Kudin, V. N. Staroverov, T. Keith, R. Kobayashi, J. Normand, K. Raghavachari, A. Rendell, J. C. Burant, S. S. Iyengar, J. Tomasi, M. Cossi, N. Rega, J. M. Millam, M. Klene, J. E. Knox, J. B. Cross, V. Bakken, C. Adamo, J. Jaramillo, R. Gomperts, R. E. Stratmann, O. Yazyev, A. J. Austin, R. Cammi, C. Pomelli, J. W. Ochterski, R. L. Martin, K. Morokuma, V. G. Zakrzewski, G. A. Voth, P. Salvador, J. J. Dannenberg, S. Dapprich, A. D. Daniels, O. Farkas, J. B. Foresman, J. V. Ortiz, J. Cioslowski, and D. J. Fox, Gaussian, Inc., Wallingford CT, 2010.
- S6. P. J. Hay, W. R. Wadt, *J. Chem. Phys.* 1985, **82**, 299.
- S7. (a) M. T. Cancès, B. Mennucci, and J. Tomasi, *J. Chem. Phys.* 1997, **107**, 3032; (b) B. Mennucci, J. Tomasi, *J. Chem. Phys.* 1997, **106**, 5151; (c) B. Mennucci, E. Cancès, J. Tomasi, *J. Phys. Chem. B* 1997, **101**, 10506; (d) J. Tomasi, B. Mennucci, E. Cancès, *J. Mol. Struct. (Theochem)* 1999, **464**, 211.
